# Supplementary material for: Experimental and computational investigation of the α-amylase catalyzed Friedel–Crafts reaction of isatin to access symmetrical and unsymmetrical 3,3′,3′′-trisindoles
Source: Royal Society of Chemistry journal article supplement (doi:10.1039/d3ob01928d), 2024-01-01
Supplement: d3ob01928d1.pdf [file d3ob01928d1.pdf]

# Experimental and computational investigation of $\alpha$ -amylase catalysed Friedel–Crafts reaction on isatin to access symmetrical and unsymmetrical 3,3',3''-trisindoles

Priya Kamboj,<sup>a</sup> Abinash Mohapatra,<sup>a</sup> Debasish Mandal<sup>a</sup> and Vikas Tyagi<sup>a\*</sup>

<sup>a</sup>School of Chemistry and Biochemistry

Thapar Institute of Engineering and Technology (TIET), Patiala, Punjab

E-mail: vikas.tyagi@thapar.edu

## Table of Contents:

|                                                     |         |
|-----------------------------------------------------|---------|
| Procedure for control experiments.....              | S2      |
| Procedure for Hammett Studies.....                  | S2      |
| Procedure for Scale up Reaction.....                | S3      |
| <sup>1</sup> H and <sup>13</sup> C NMR Spectra..... | S4-S36  |
| Computational Methods and details.....              | S37-S76 |
| References.....                                     | S77-S78 |

## **General Procedures:**

### **Procedure for control experiments:**

To investigate the role of enzyme in the reaction, five distinct control reactions were set up. Five teflon tubes were taken for the experiments, and each tube was equipped with magnetic beads. Subsequently, a volume of 4.25 ml of water was added to each tube, following this, the catalyst ( $\alpha$ -amylase, denatured amylase, and BSA) with the concentration of 3 mg/ml were added into the different reaction tubes. Next, additives like starch (0.032 mmol, 0.3 equiv.) and urea (0.75 mmol, 1 equiv.) were added into two reaction tubes. Then, the reactants, isatin (0.68 mmol, 1 equivalent), indole (0.675 mmol, 1 equivalent), and 5-methoxyindole (0.680 mmol, 1 equivalent), were subsequently dissolved in 0.75 ml of DMSO and added to the reaction vials. The resultant reaction mixture was subjected to gentle stirring at a temperature of 50°C for a duration of 12 hours. The mixture was extracted using ethyl acetate and the volatiles were evaporated under high vacuum conditions. The resulting crude mixture was then subjected to purification via column chromatography, utilizing silica (mesh size 60-120) as the stationary phase and a mobile phase consisting of a mixture of ethyl acetate and hexane. This purification process aimed to obtain both 3,3',3''-trisindoles or 3-hydroxy bisindoles.

### **Procedure for hammett studies:**

In a Teflon tube having a stirrer, 4.25 ml of deionized water, 3 mg/ml of the enzyme ( $\alpha$ -amylase from *Aspergillus oryzae*) were added. Afterwards, the reactants, isatin (0.68 mmol, 1.0 equiv.), substituted isatin (0.68 mmol, 1.0 equiv.) and indole (1.35 mmol, 2.0 equiv.) were dissolved in 0.75 ml of dimethyl sulfoxide (DMSO) and subsequently introduced into the reaction tube. The resulting reaction mixture was subjected to gentle stirring at a temperature of 50°C for a duration of 12 hours. Then the mixture underwent extraction using ethyl acetate (3x10 ml) followed by the evaporation of volatiles under high vacuum conditions. The resulting crude mixture was then subjected to purification via column chromatography, utilizing silica (mesh size 60-120) as the stationary phase and a mobile phase consisting of a mixture of ethyl acetate and hexane. This process allowed for the separate isolation of substituted and unsubstituted 3,3',3''-trisindoles, and the yields of these isolated compounds were determined.

**Procedure for scale-up reactions:**

In the context of scaling up a reaction, a round-bottom flask with a volume of 100 mL was taken. In this experimental setup, a stirrer bar was placed inside the flask and then filled with 42.5 ml of deionized water and enzyme ( $\alpha$ -amylase from *Aspergillus oryzae*) with a concentration of 3 mg/ml. Furthermore, the reactants, isatin (6.80 mmol, 1.0 equiv.) and indole (13.5 mmol, 2.0 equiv.), were solubilized in 7.5 ml of dimethyl sulfoxide (DMSO) and introduced into a round-bottom flask, which was properly sealed using a rubber septum and paraffin film. The reaction mixture obtained was subjected to continuous stirring at a temperature of 50°C for a period of 12 hours. After the completion of the reaction, the mixture was subjected to extraction using ethyl acetate. Following this, the volatile substances underwent evaporation under conditions of high vacuum. The crude mixture obtained was subsequently purified using column chromatography, employing silica (mesh size 60-120) as the stationary phase and a mobile phase of ethyl acetate and hexane. The purification procedure thus acquired 3,3',3''-trisindoles product.

**<sup>1</sup>H and <sup>13</sup>C-NMR Spectra of Synthesized compounds (3a-3o) and (4a-4s):**

# <sup>1</sup>H and <sup>13</sup>C-NMR spectra of 3a

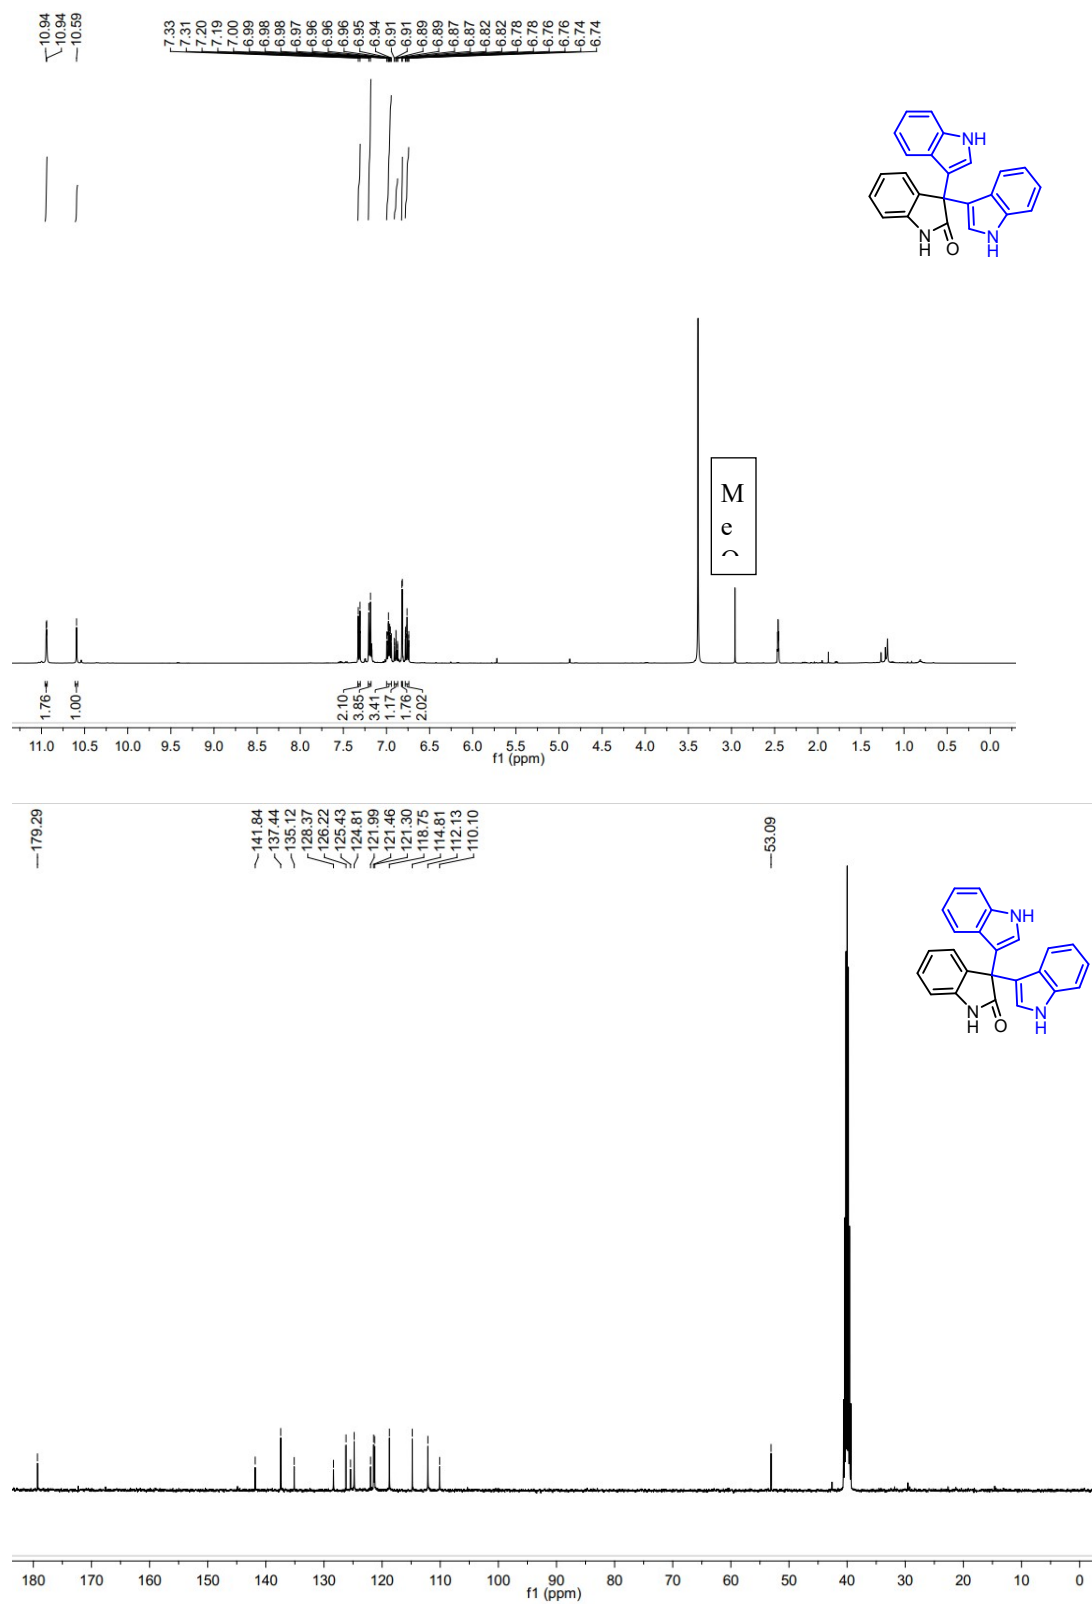

# <sup>1</sup>H and <sup>13</sup>C-NMR spectra of 3b

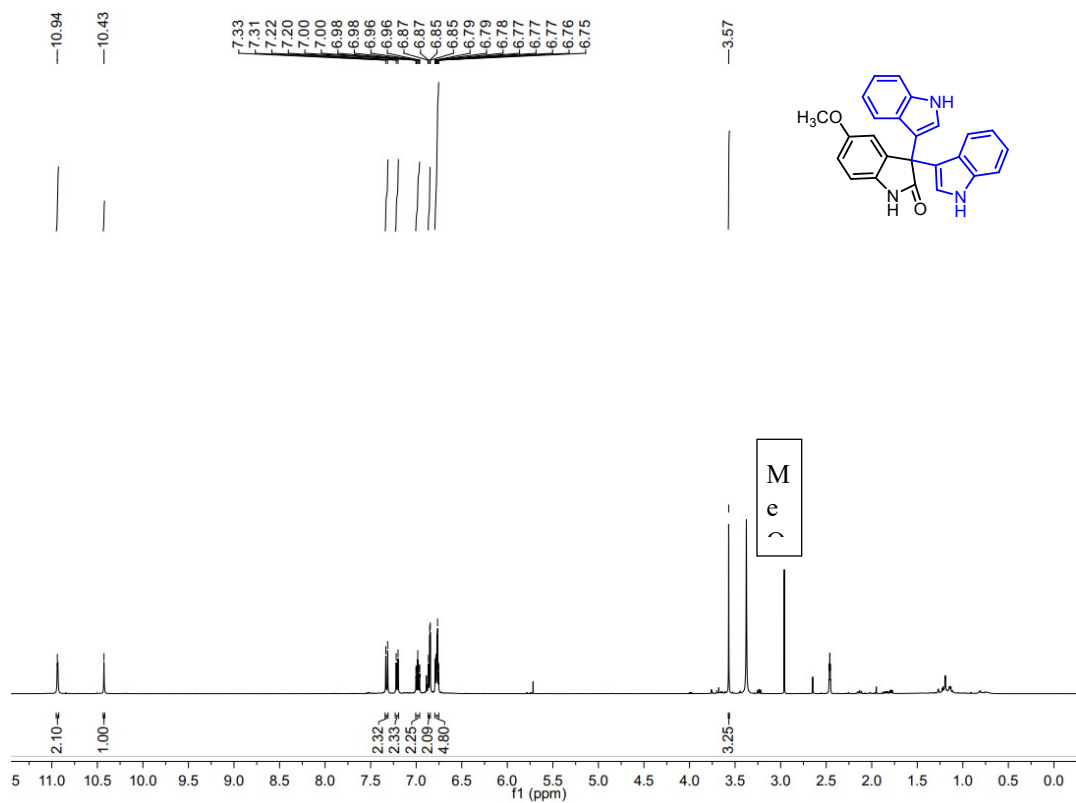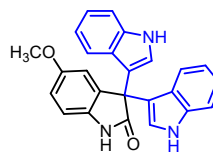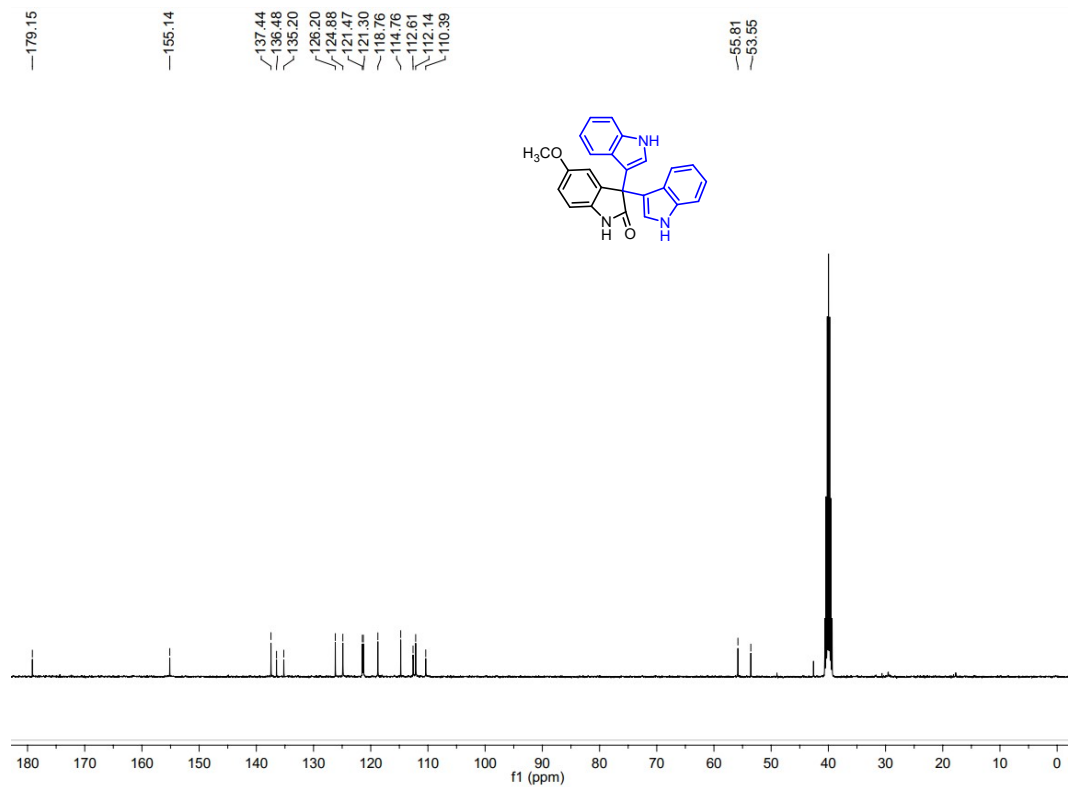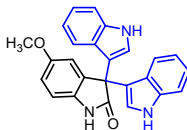

# $^1\text{H}$ and $^{13}\text{C}$ -NMR spectra of 3c

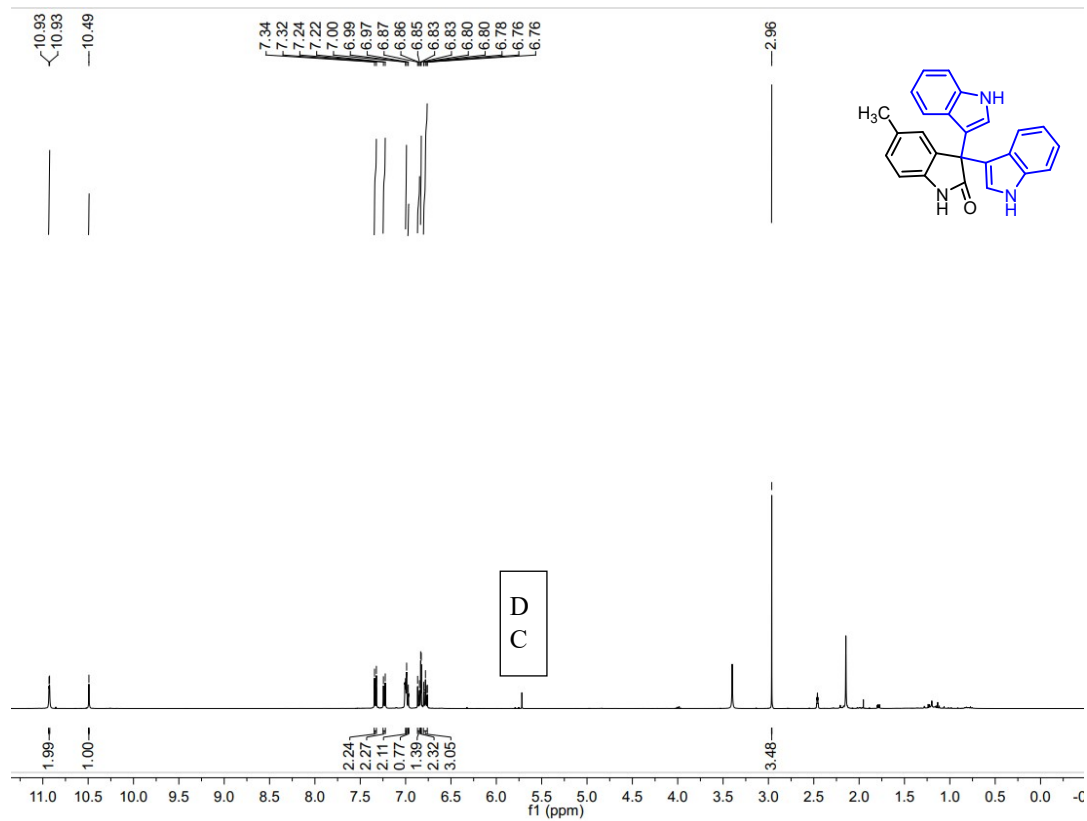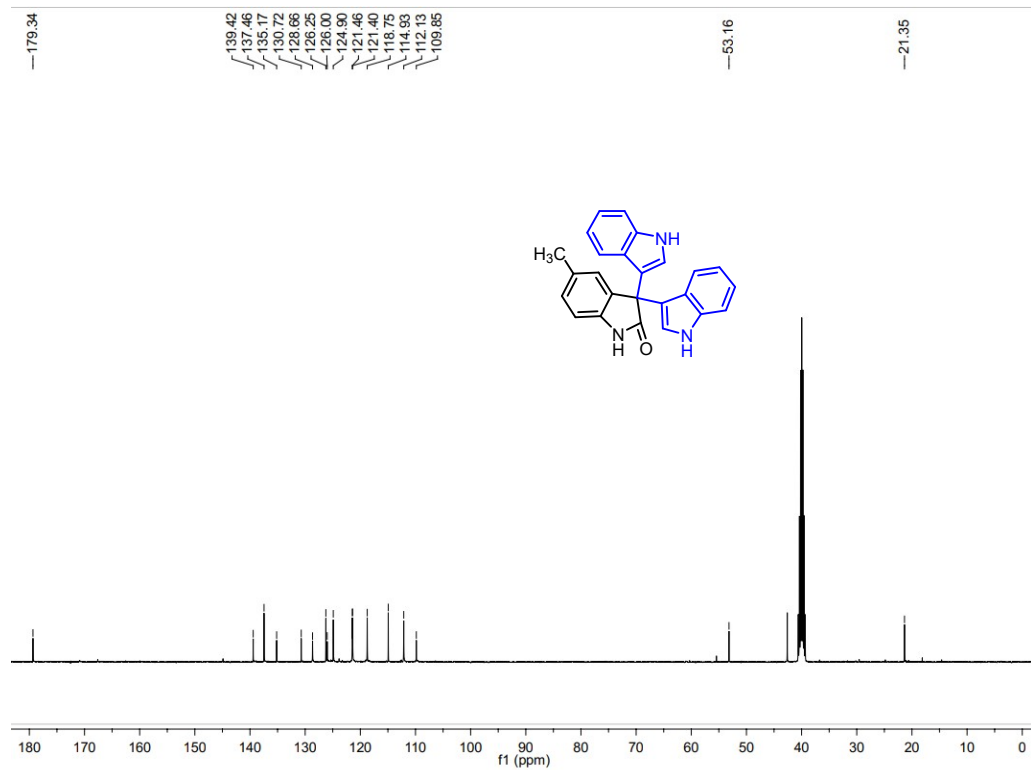

# $^1\text{H}$ and $^{13}\text{C}$ -NMR spectra of 3d

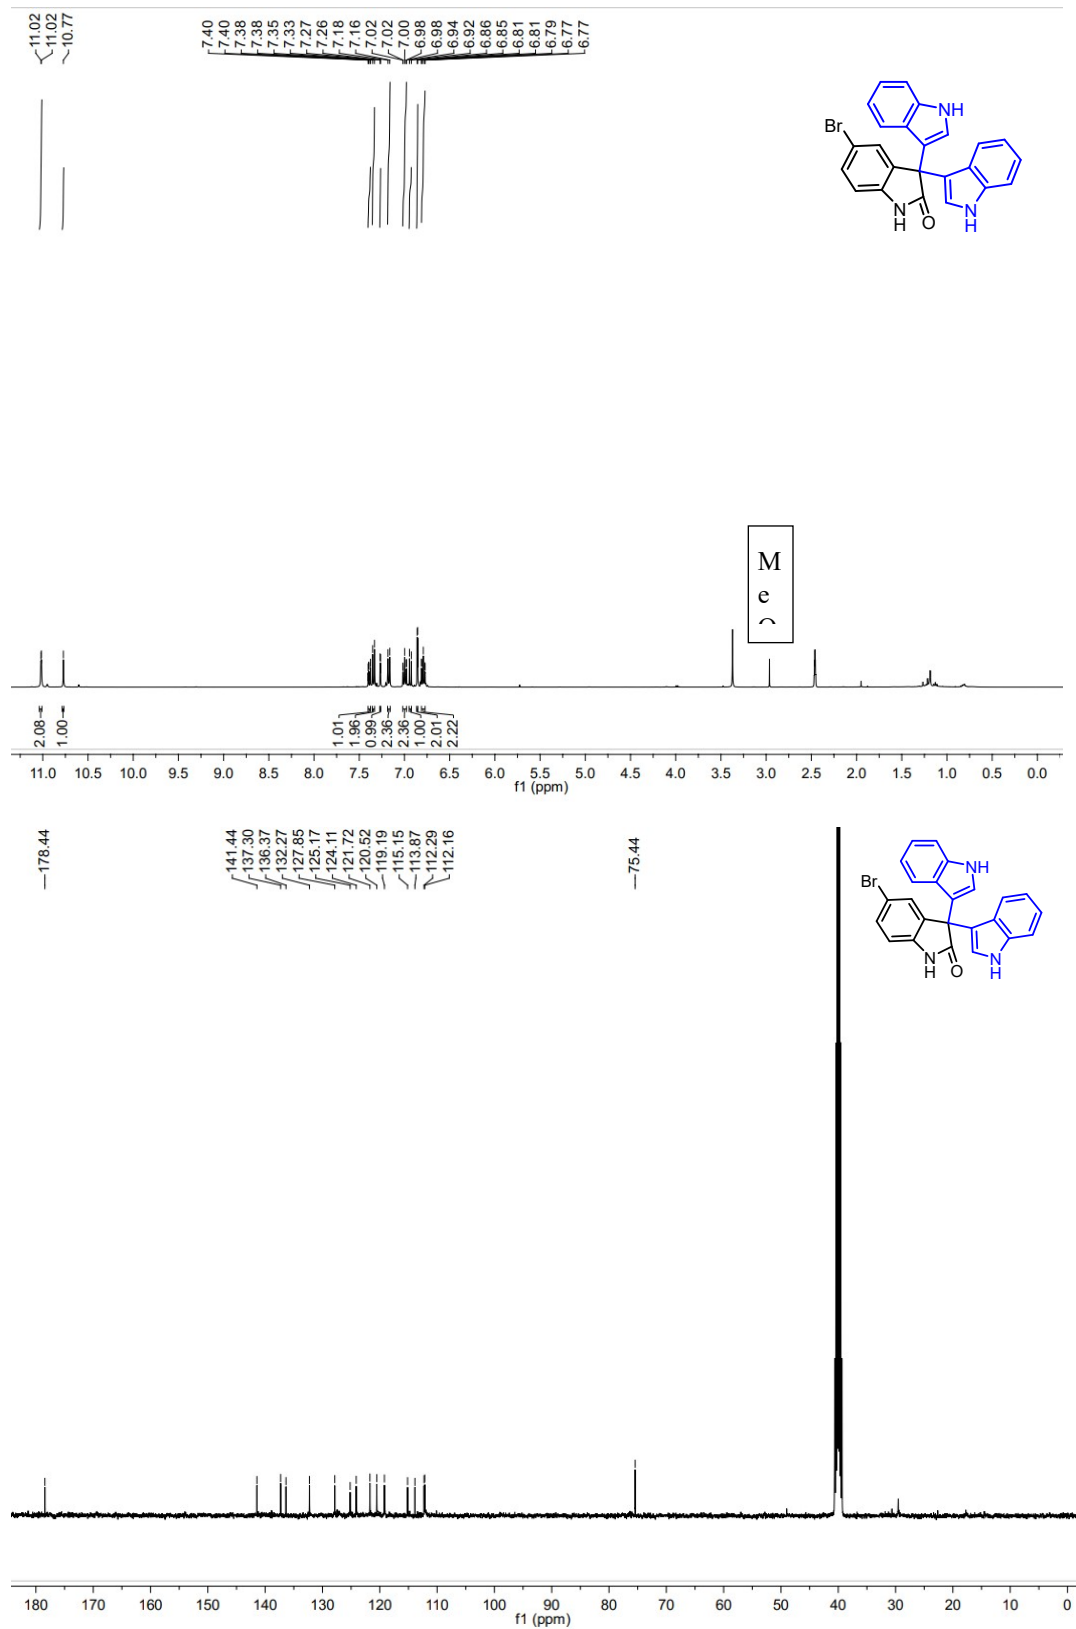

# <sup>1</sup>H and <sup>13</sup>C-NMR spectra of 3e

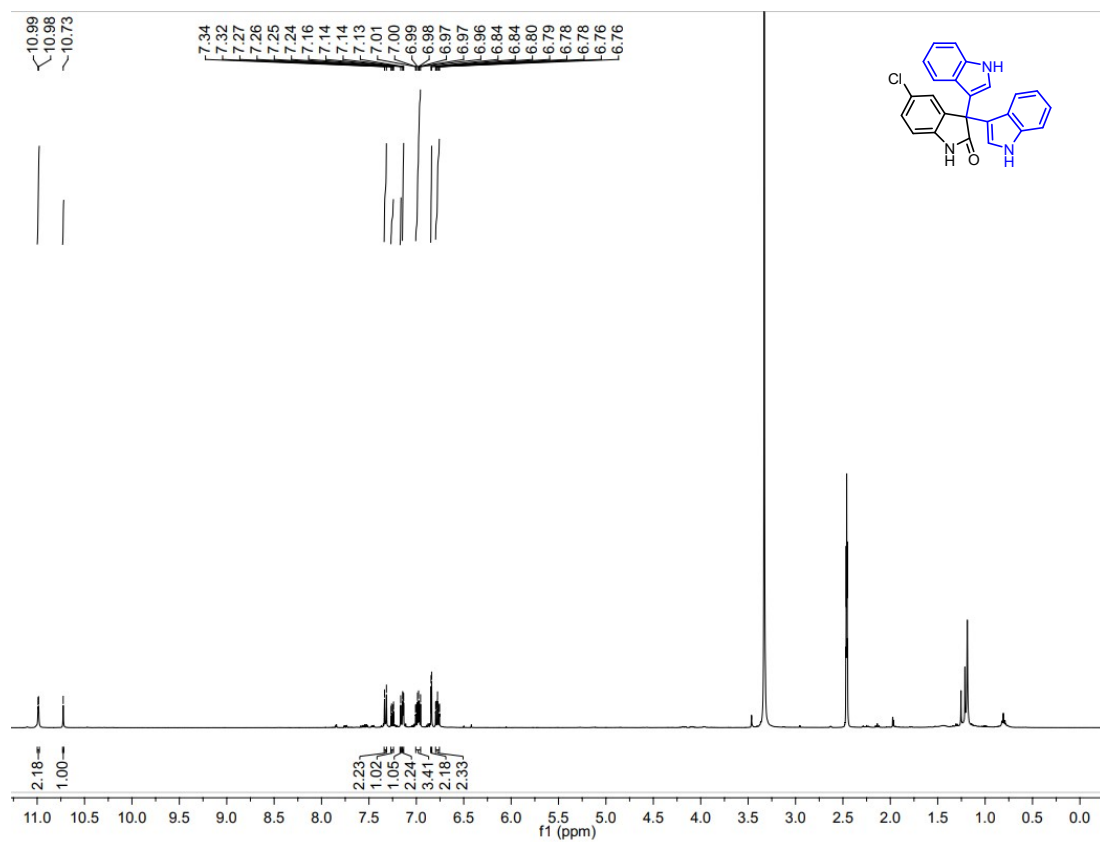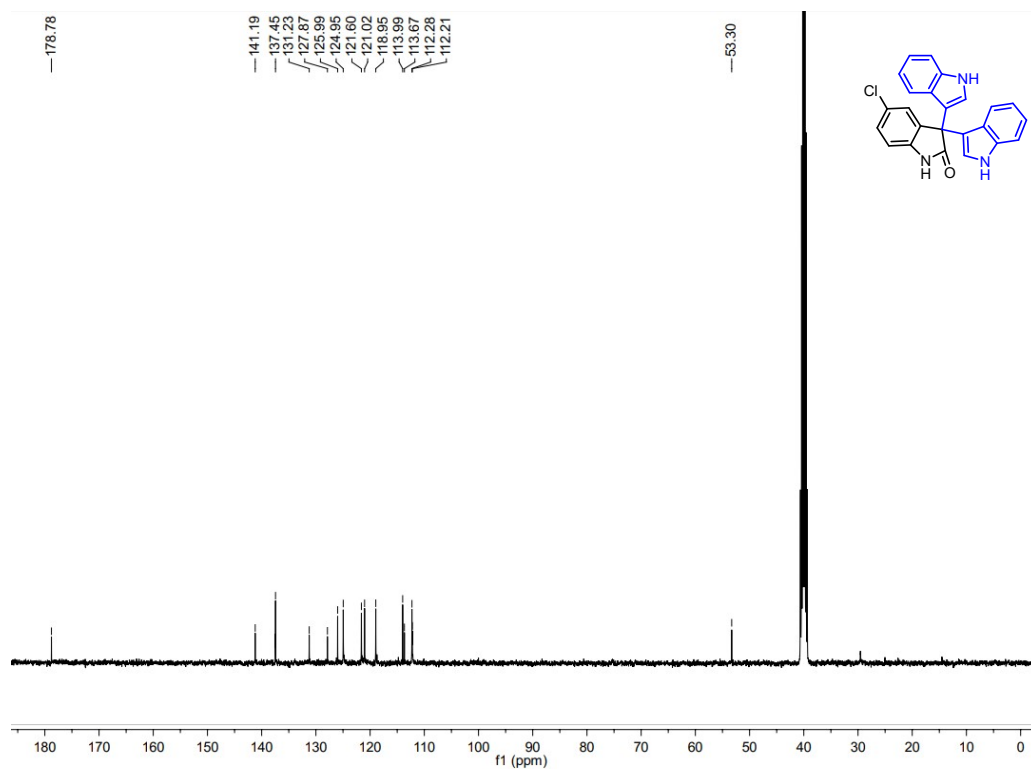



# <sup>1</sup>H and <sup>13</sup>C-NMR spectra of 3f

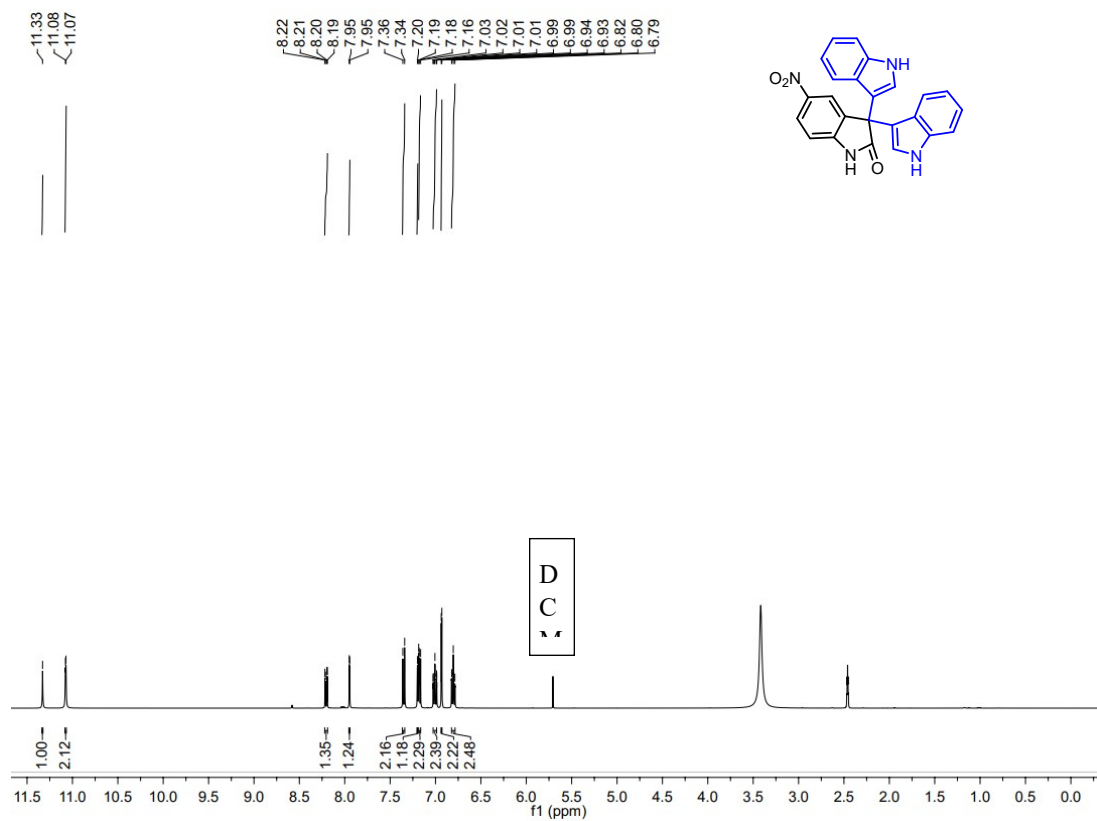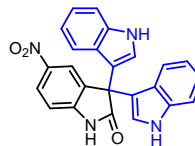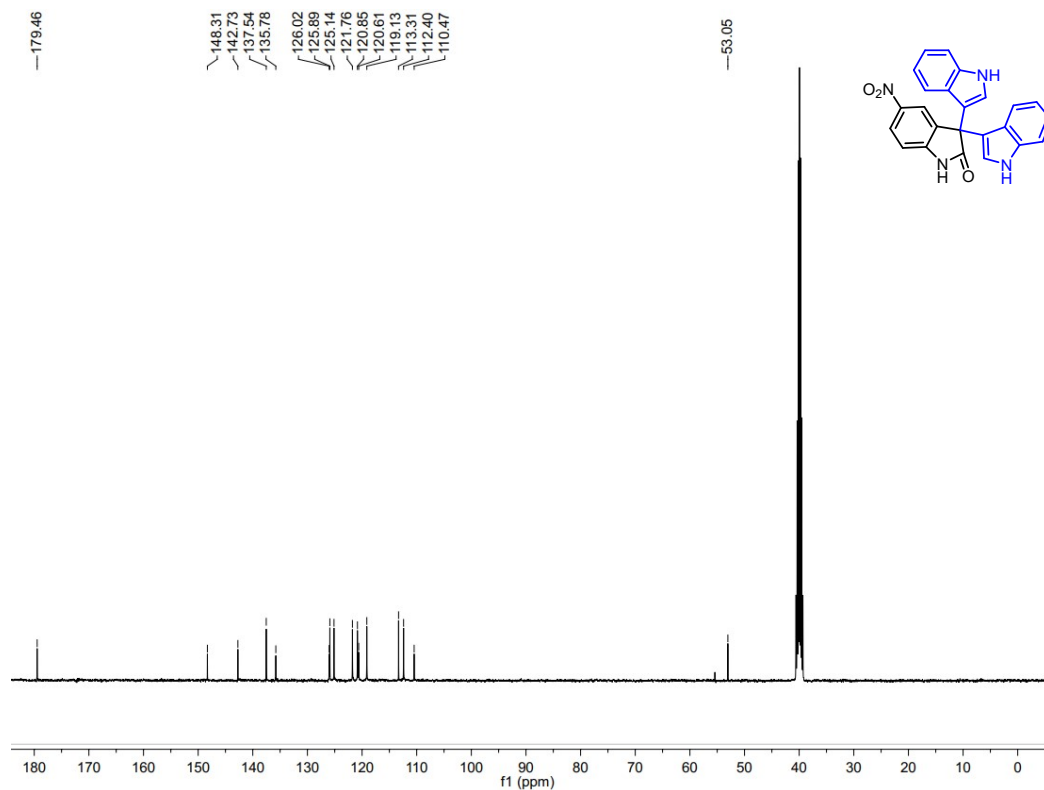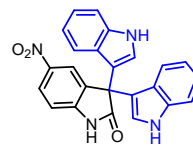

# <sup>1</sup>H and <sup>13</sup>C-NMR spectra of 3g

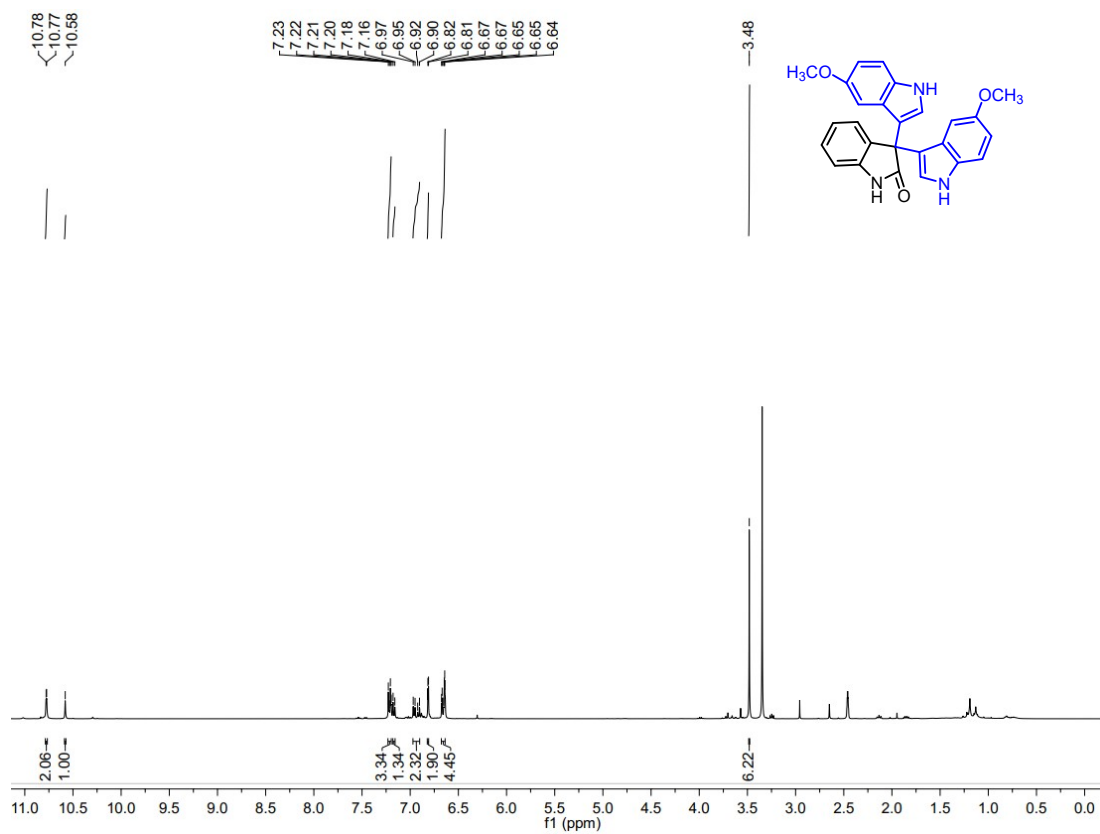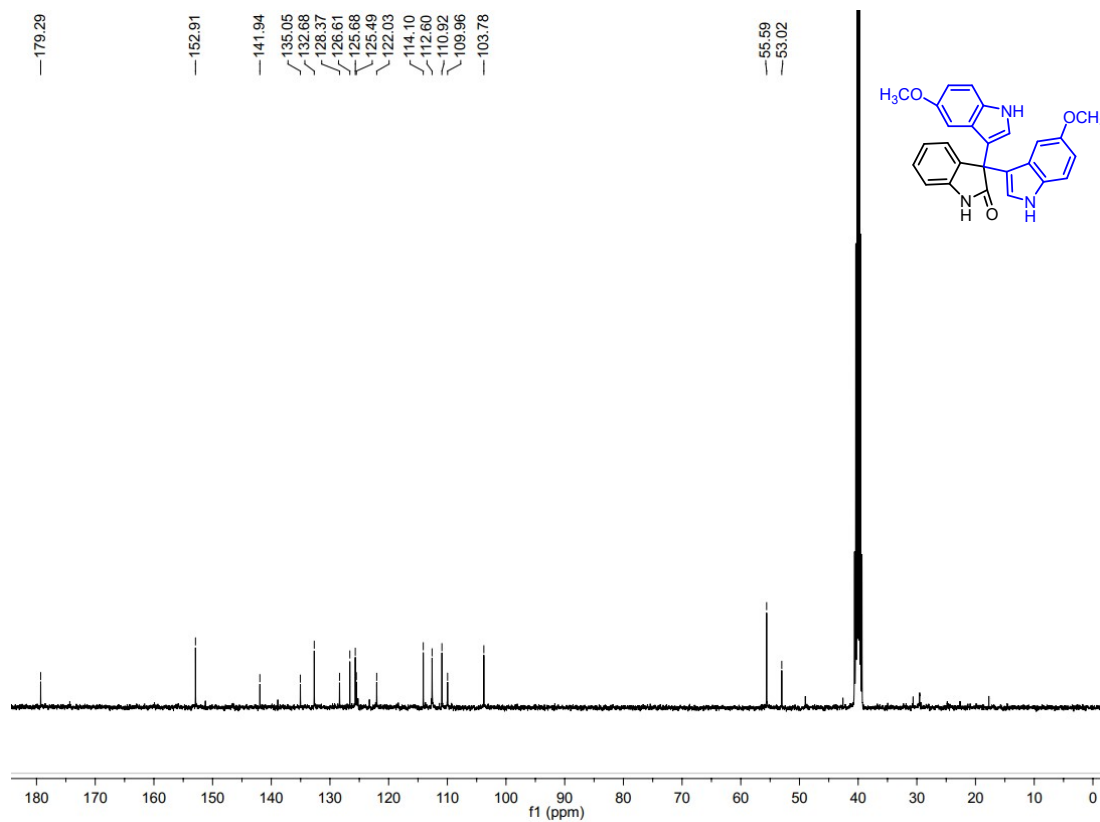

# <sup>1</sup>H and <sup>13</sup>C-NMR spectra of 3h

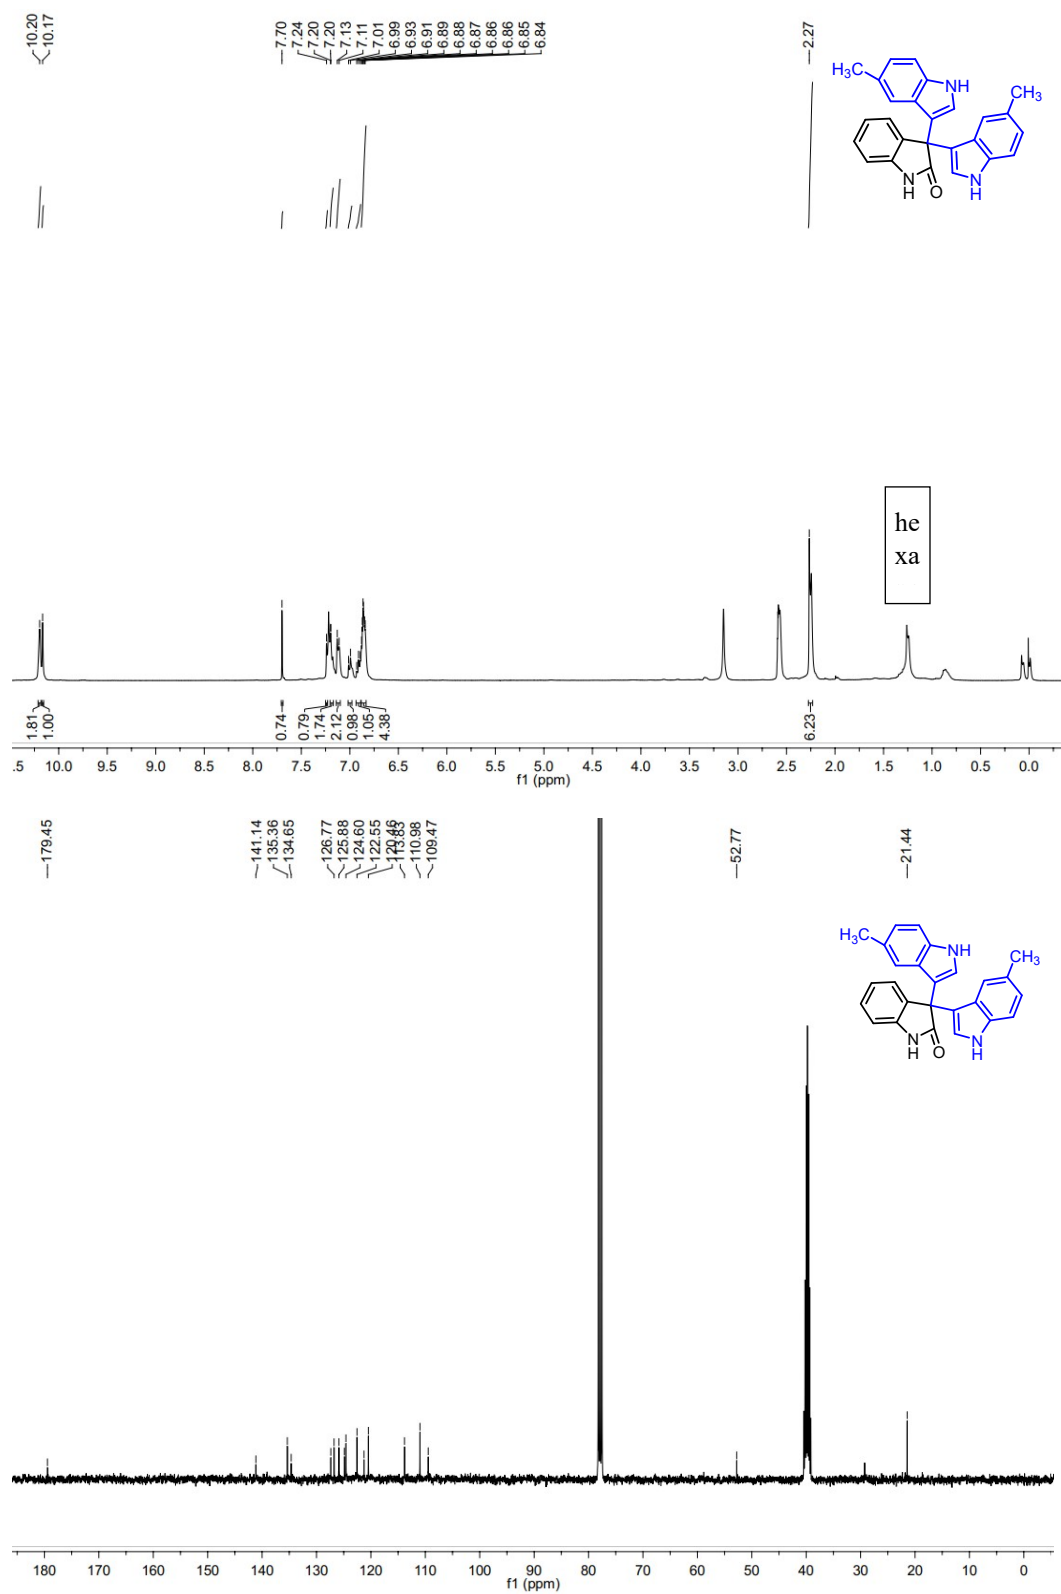

# <sup>1</sup>H and <sup>13</sup>C-NMR spectra of 3i

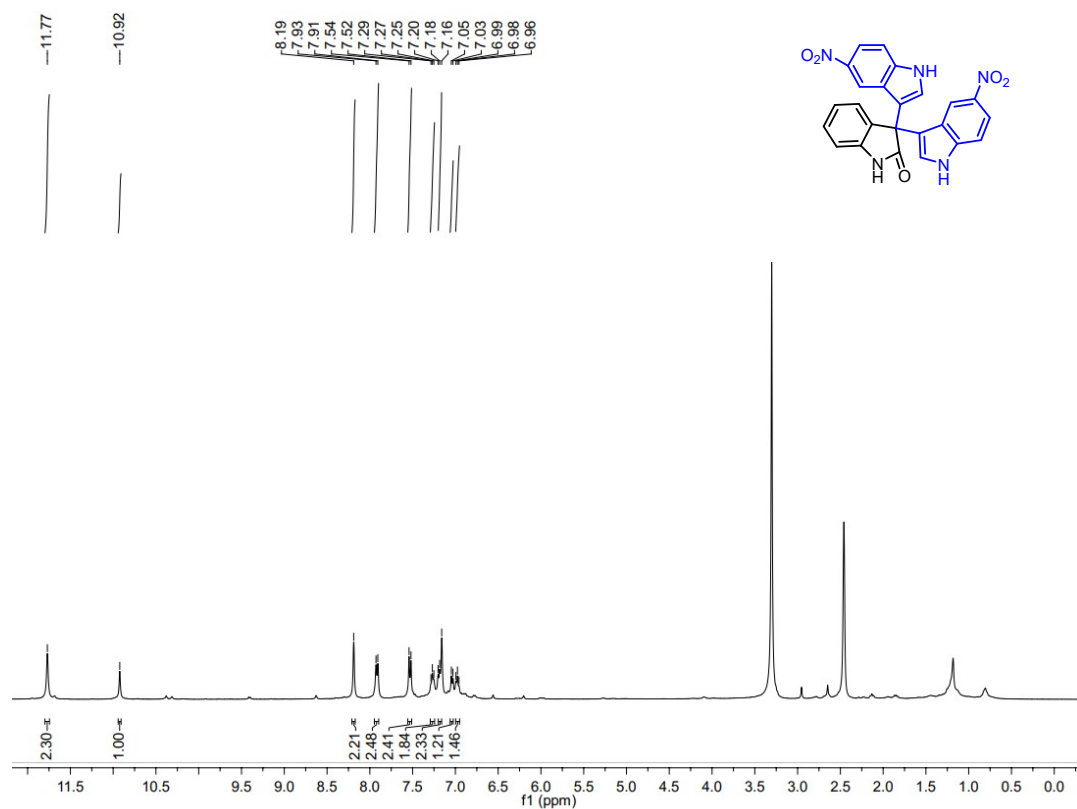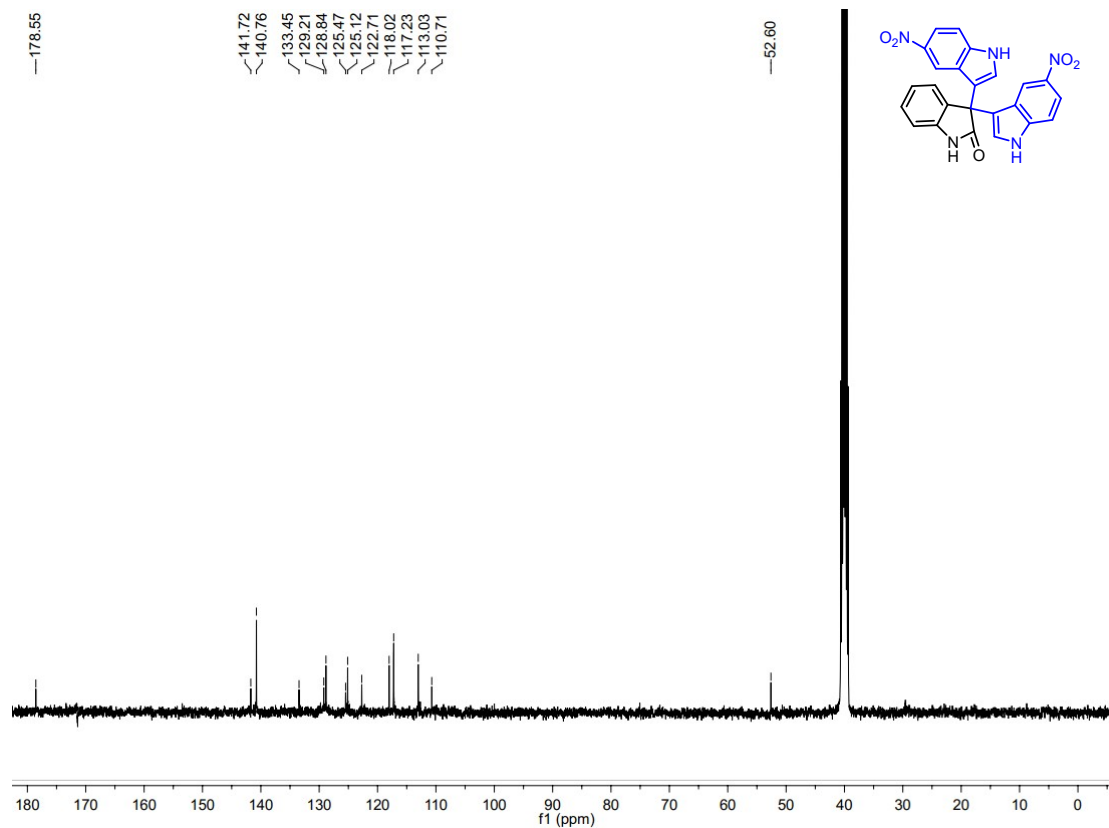

# $^1\text{H}$ and $^{13}\text{C}$ -NMR spectra of 3j

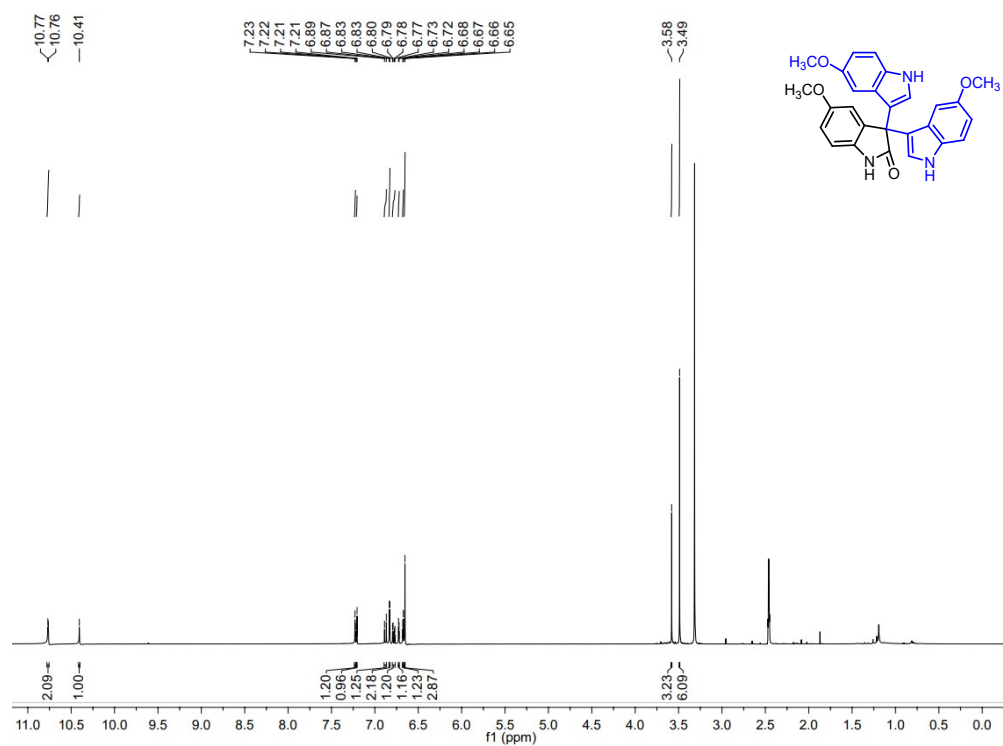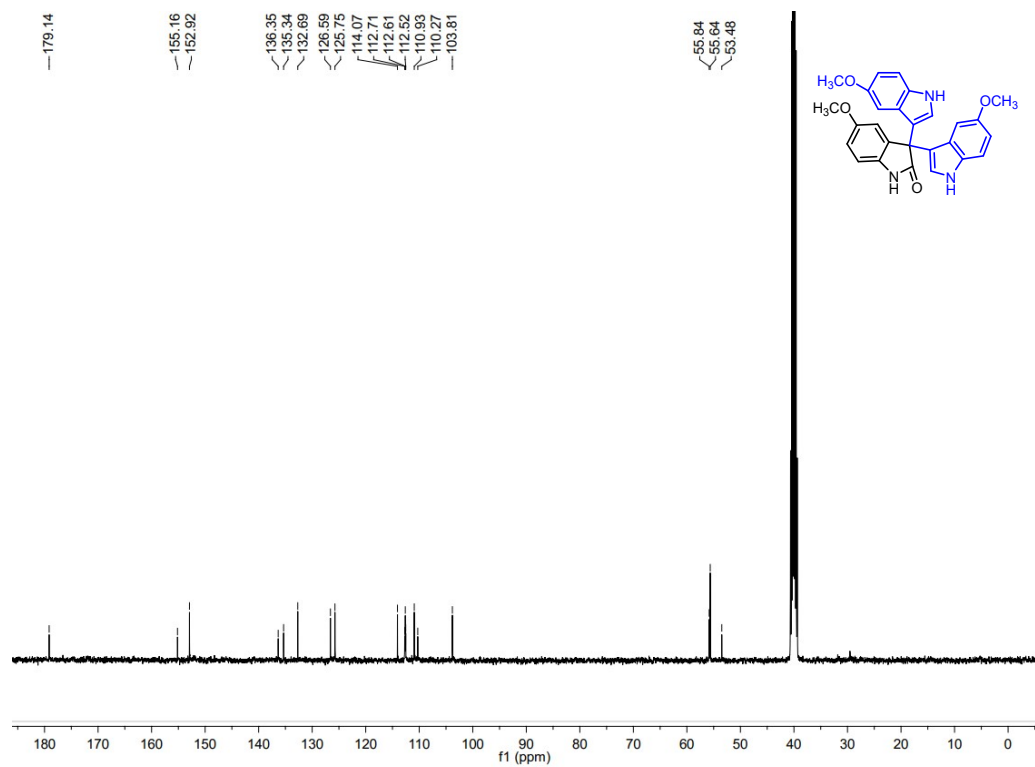

# $^1\text{H}$ and $^{13}\text{C}$ -NMR spectra of 3k

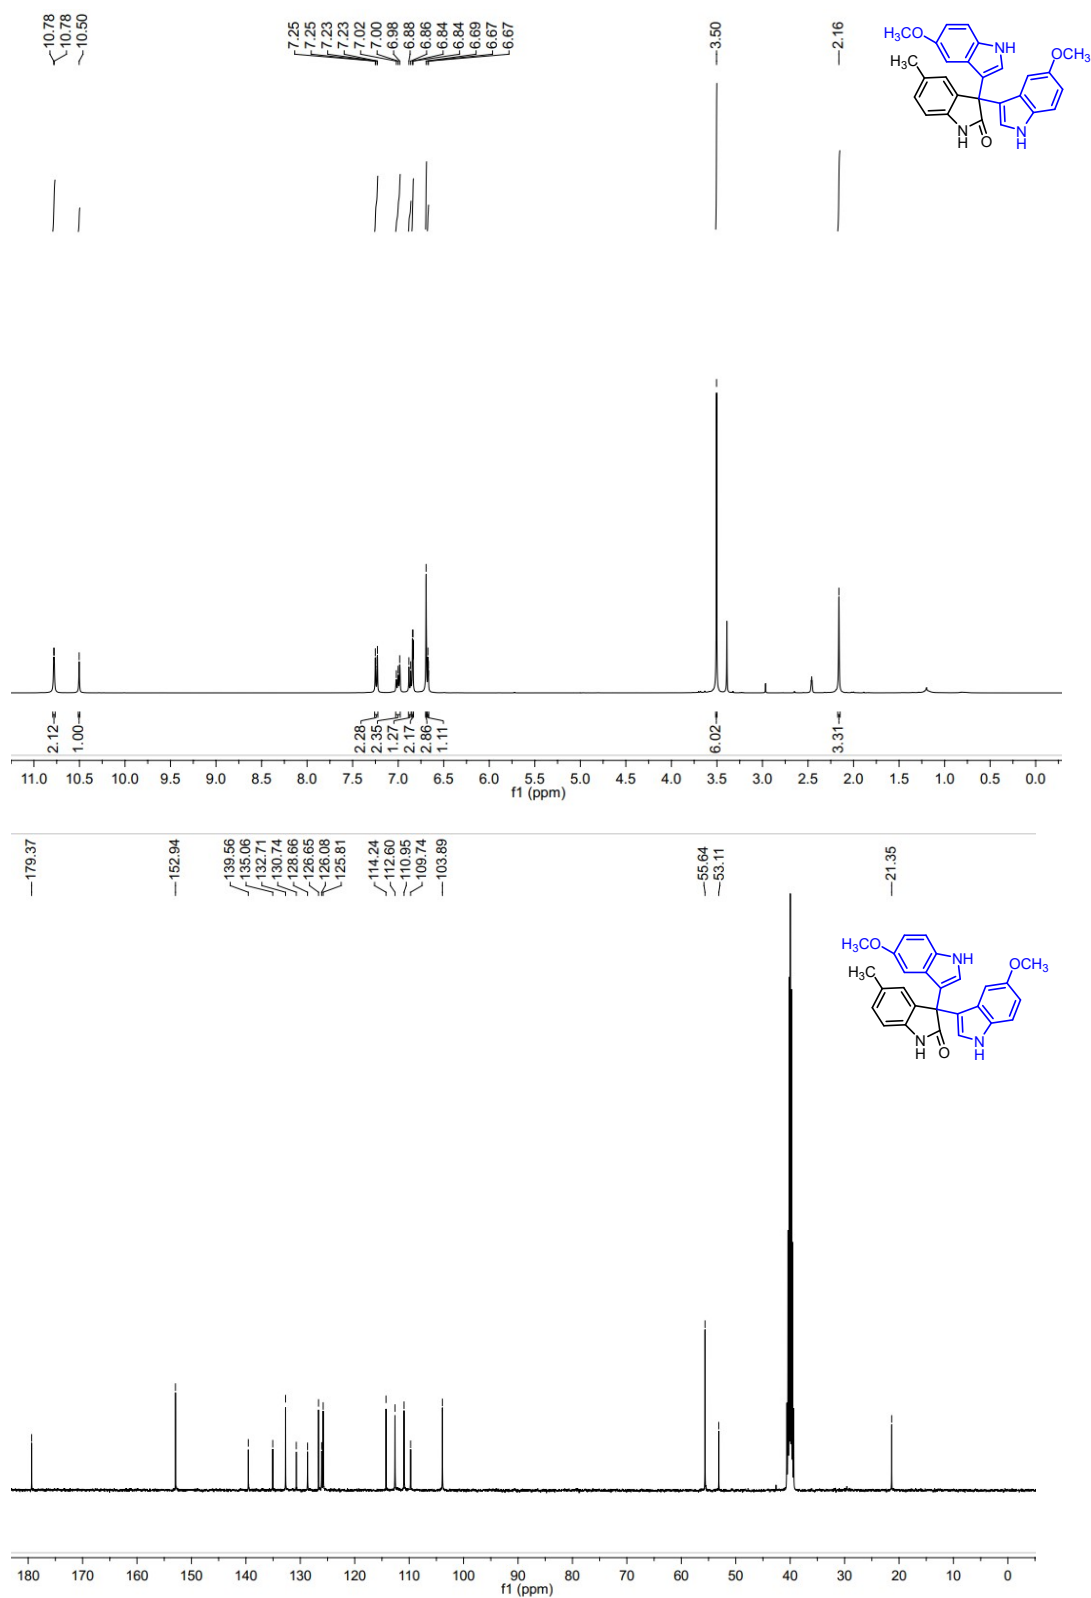

# <sup>1</sup>H and <sup>13</sup>C-NMR spectra of 3I

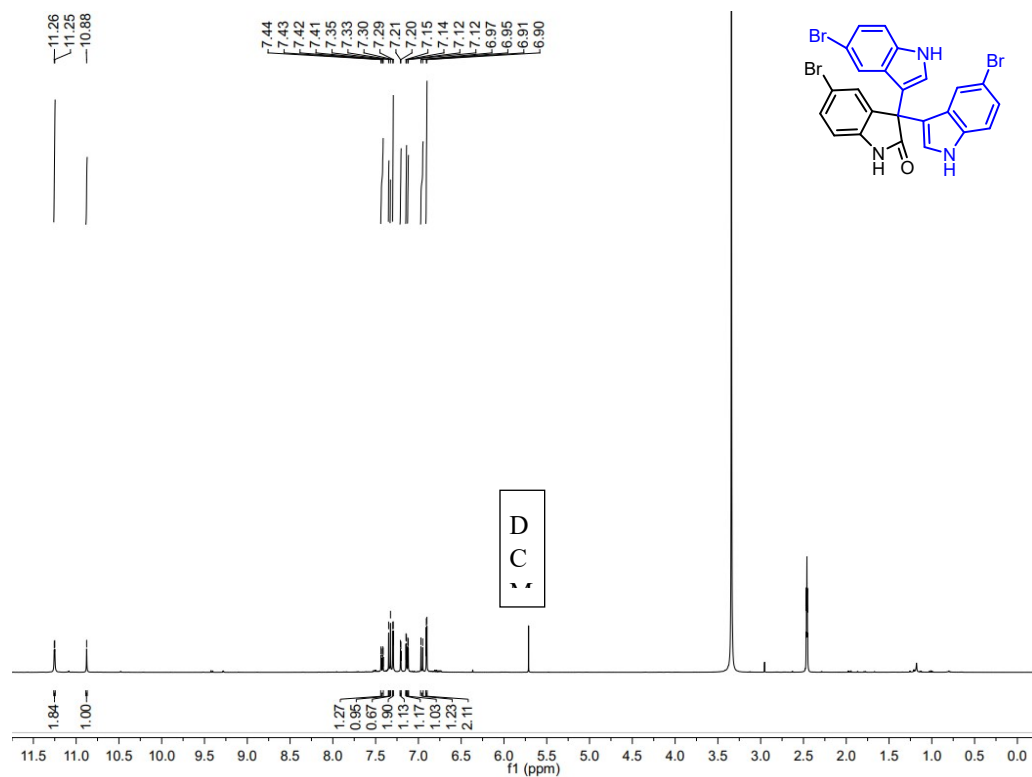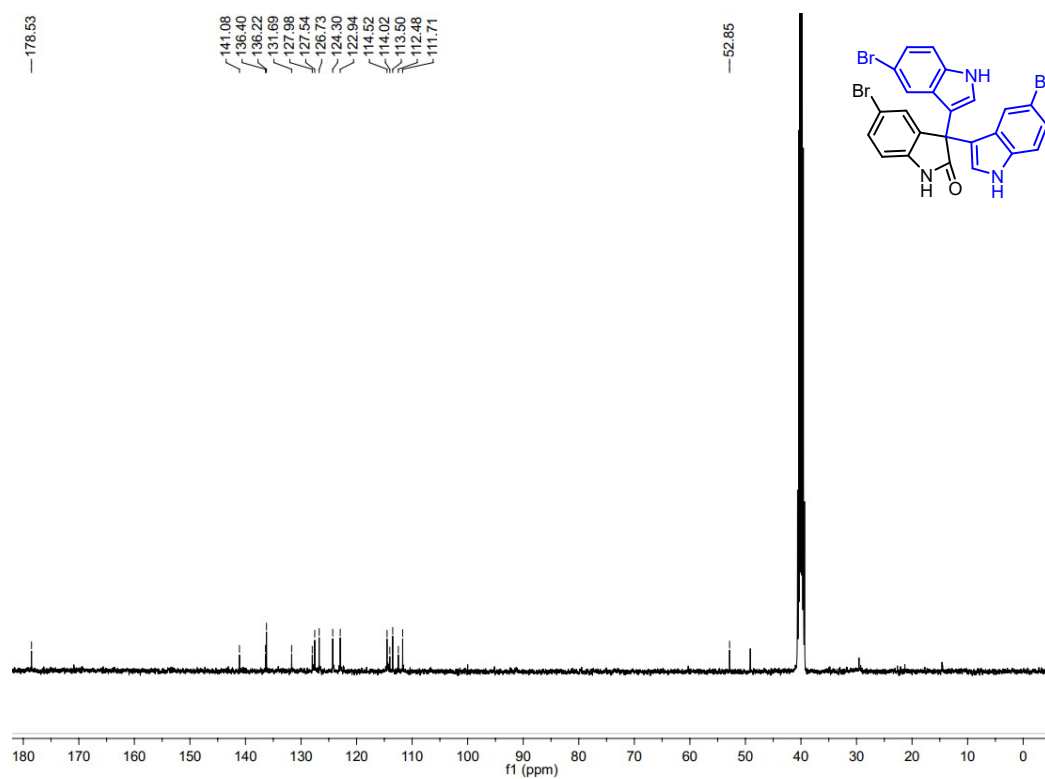

# $^1\text{H}$ and $^{13}\text{C}$ -NMR spectra of 3n

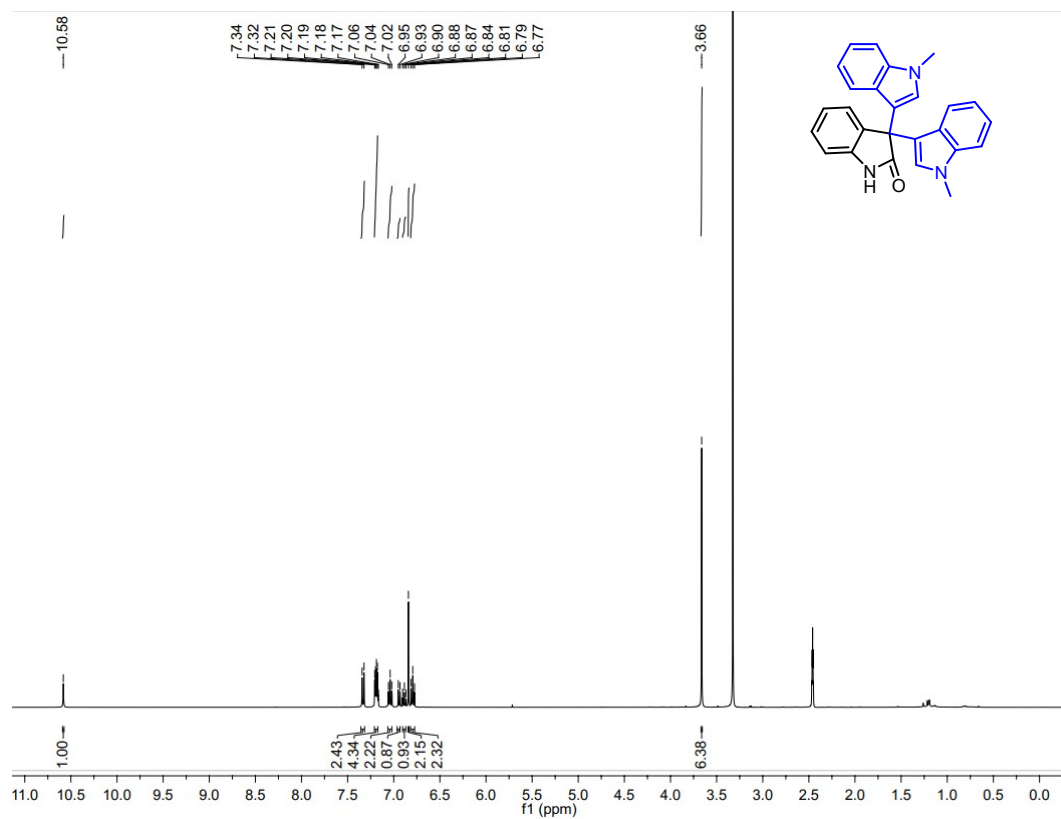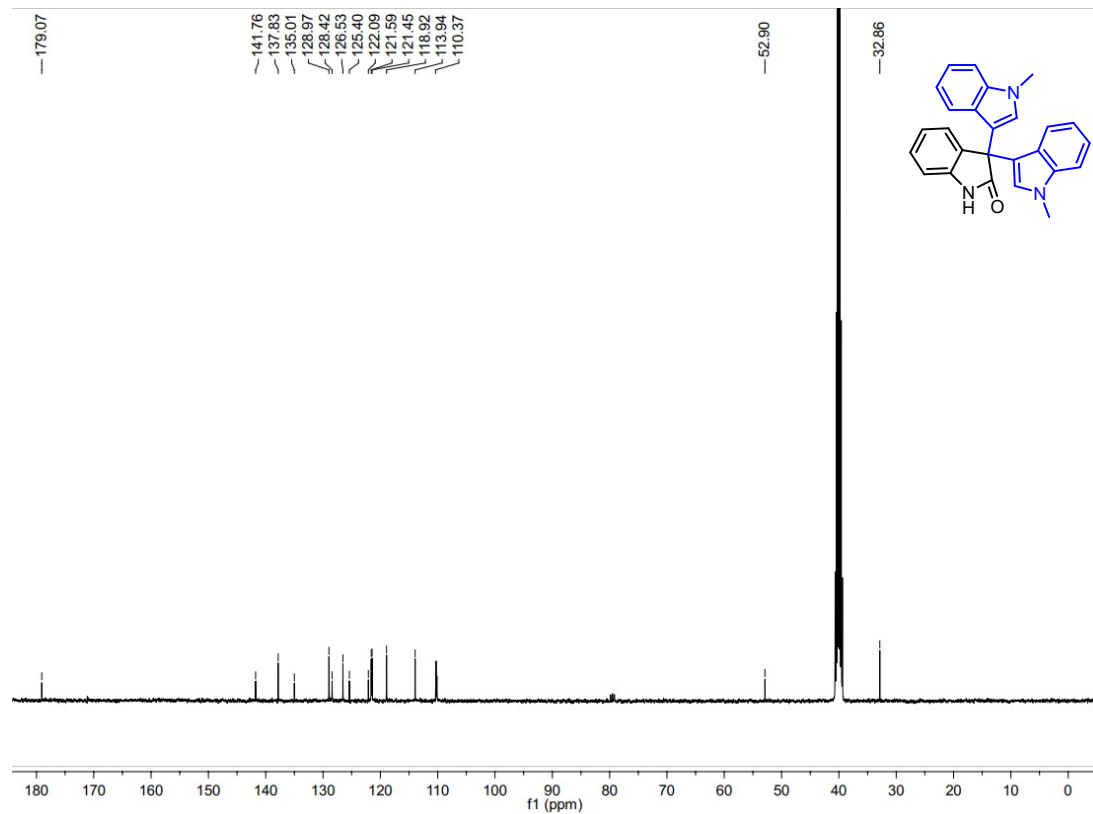



# $^1\text{H}$ and $^{13}\text{C}$ -NMR spectra of 3o

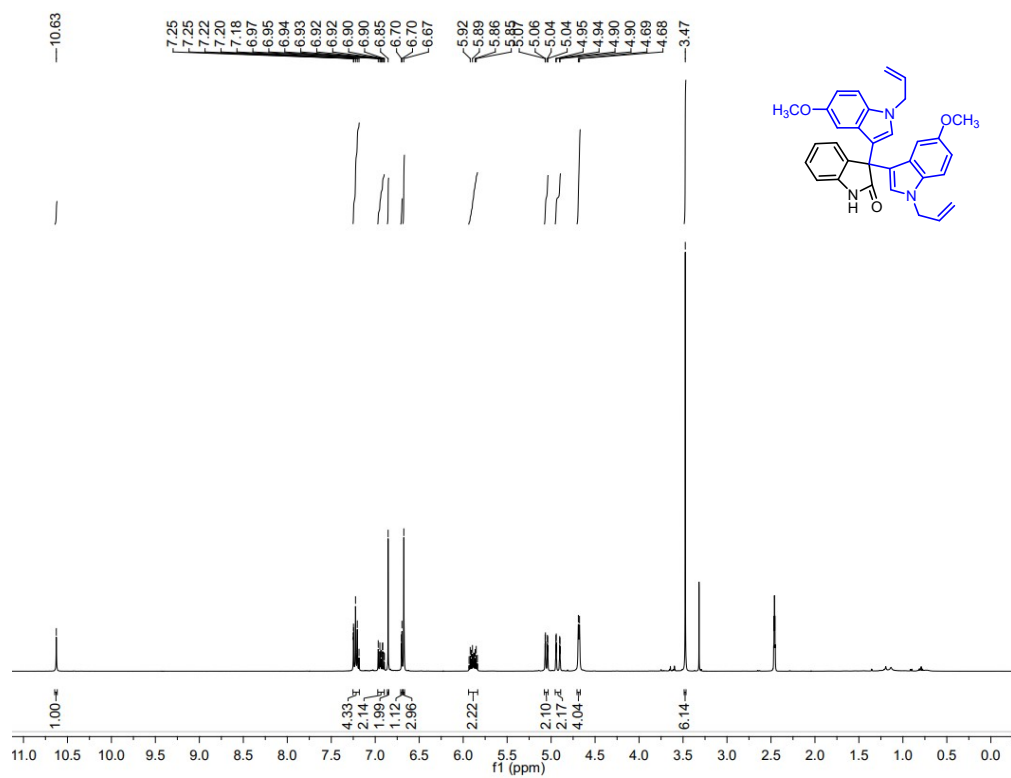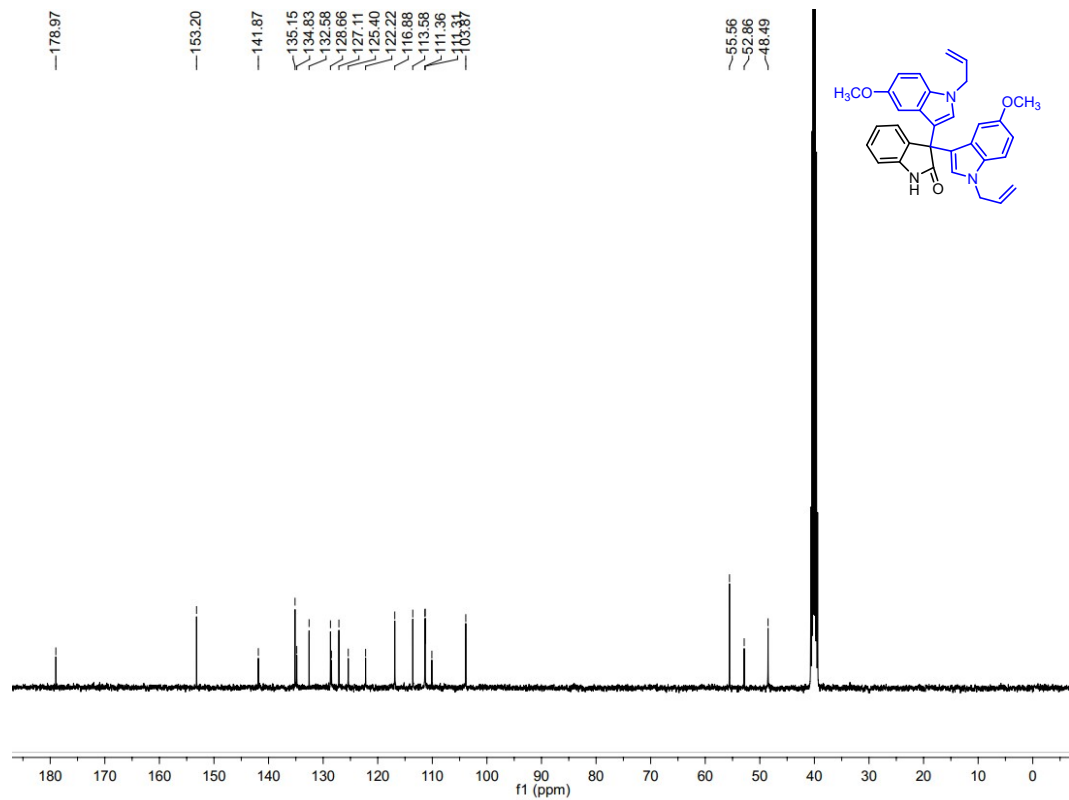

# <sup>1</sup>H and <sup>13</sup>C-NMR spectra of 4a

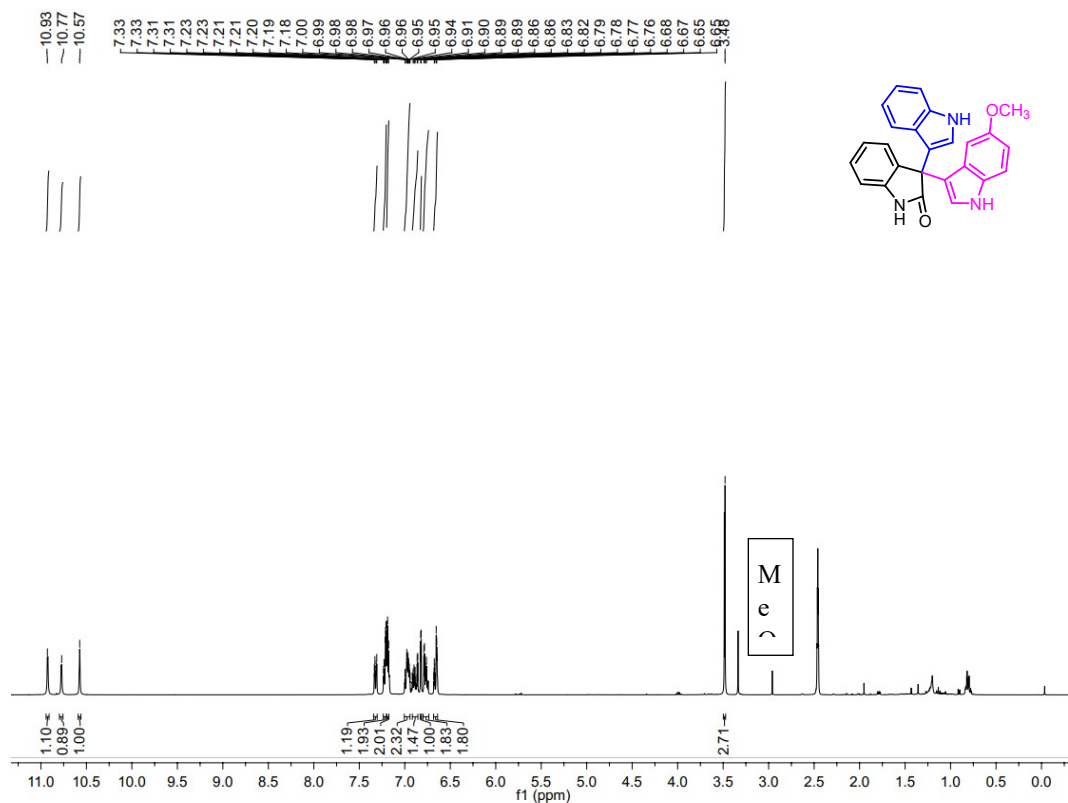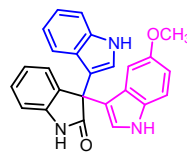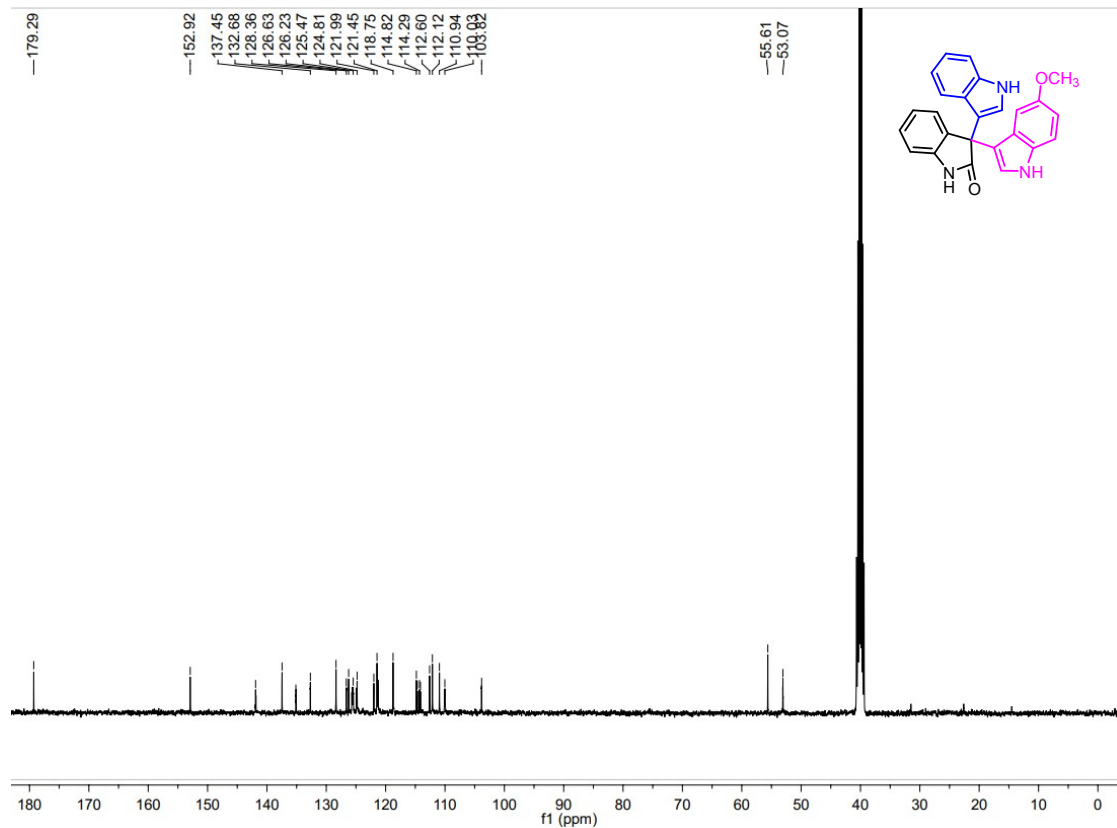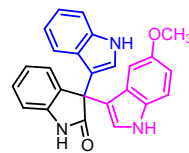

# <sup>1</sup>H and <sup>13</sup>C-NMR spectra of 4b

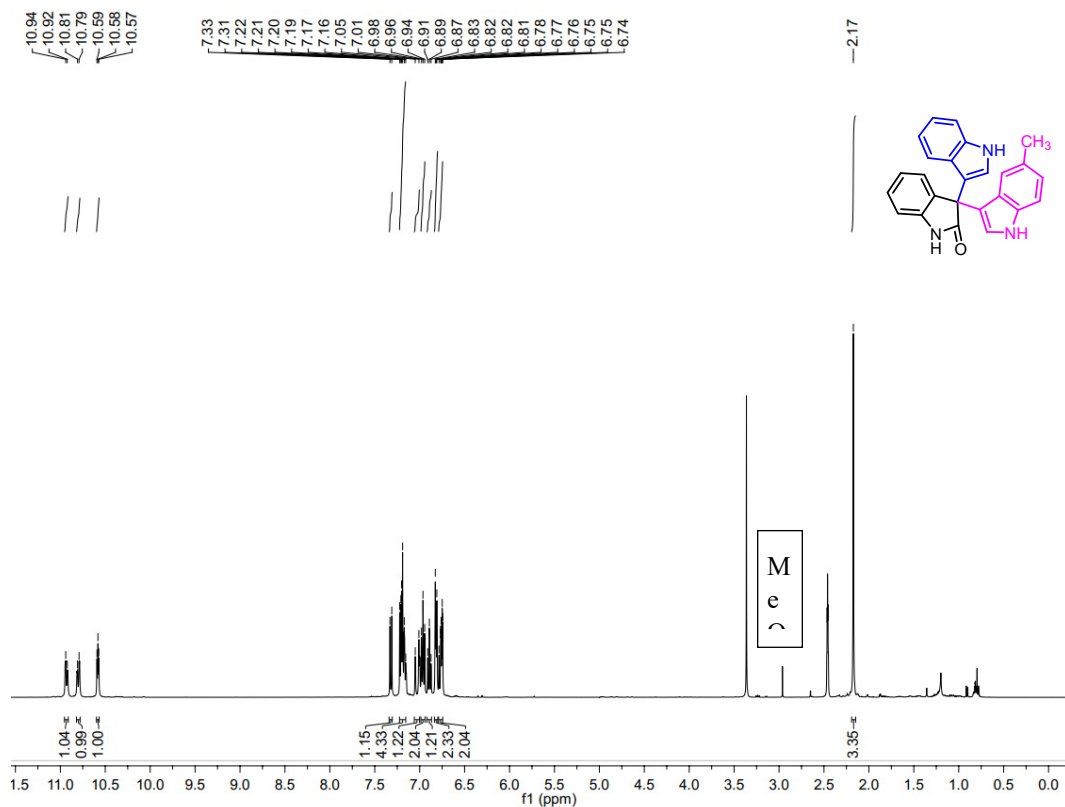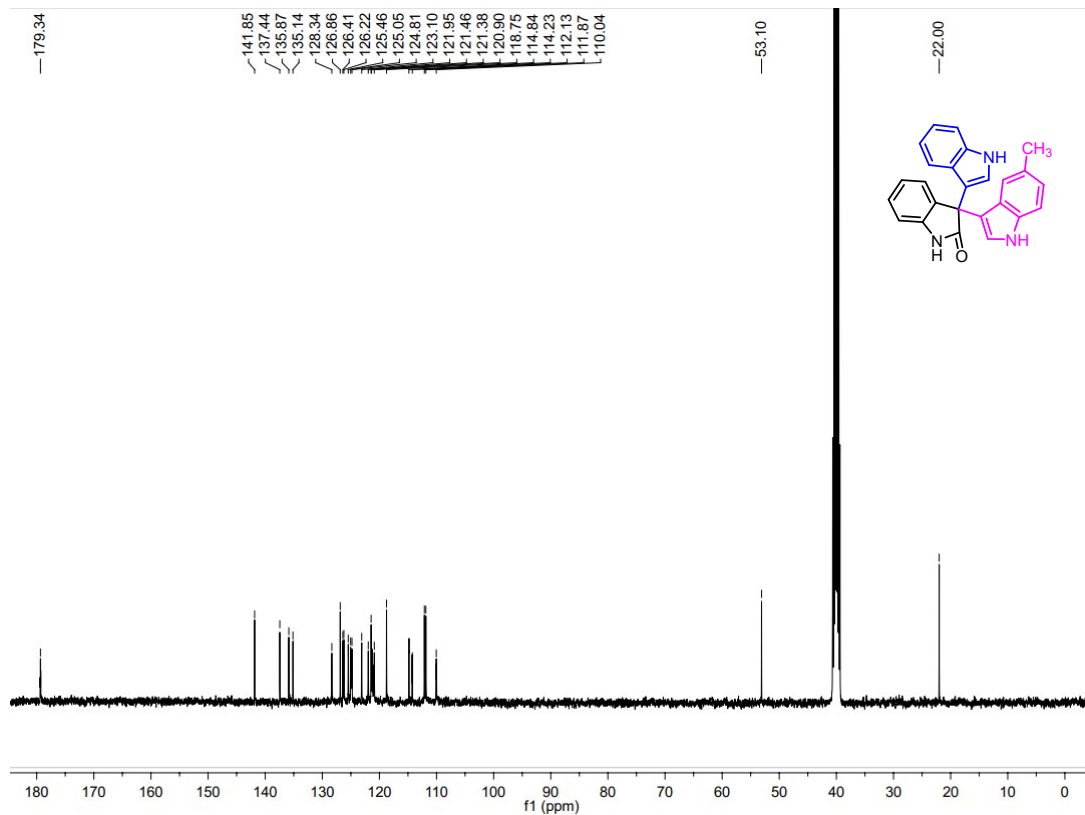

# $^1\text{H}$ and $^{13}\text{C}$ -NMR spectra of 4c

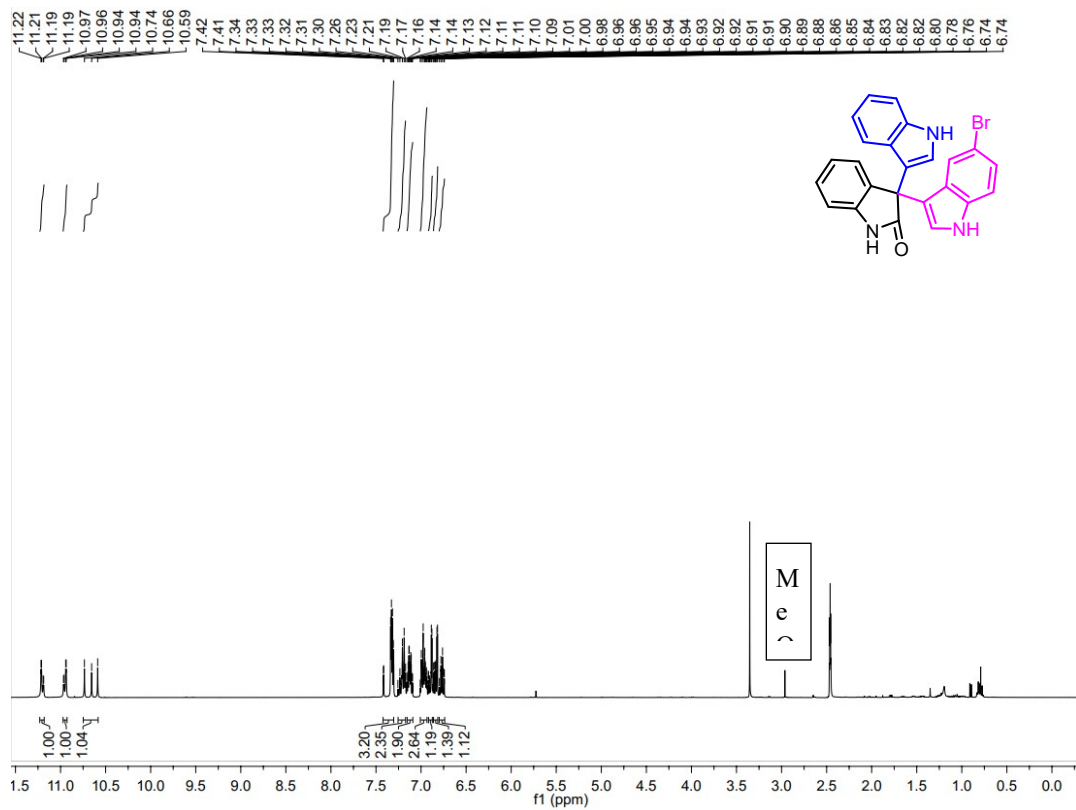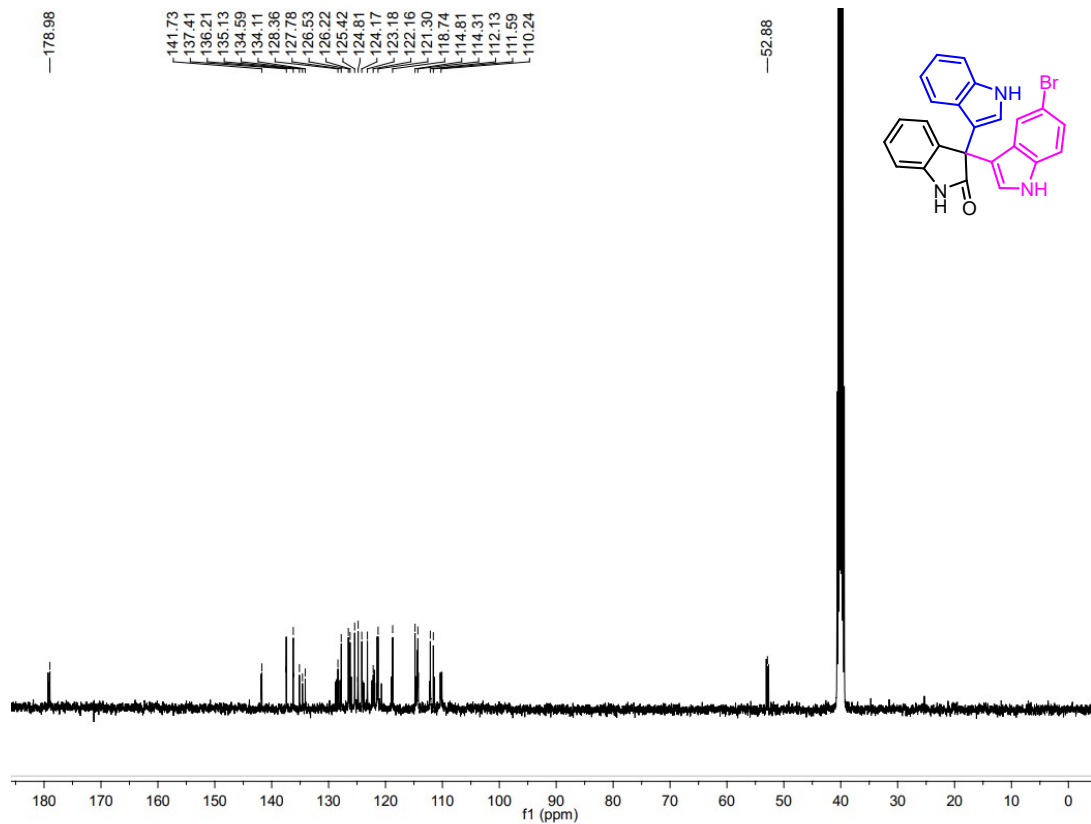

# <sup>1</sup>H and <sup>13</sup>C-NMR spectra of 4d

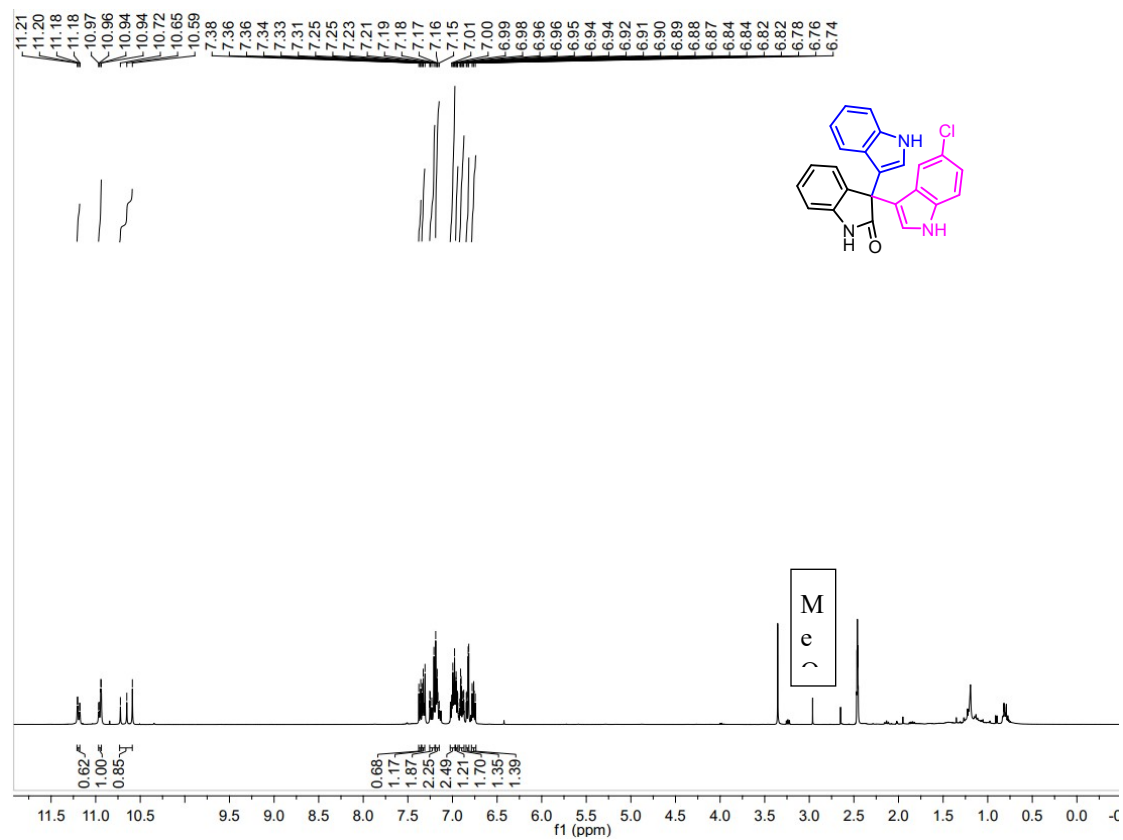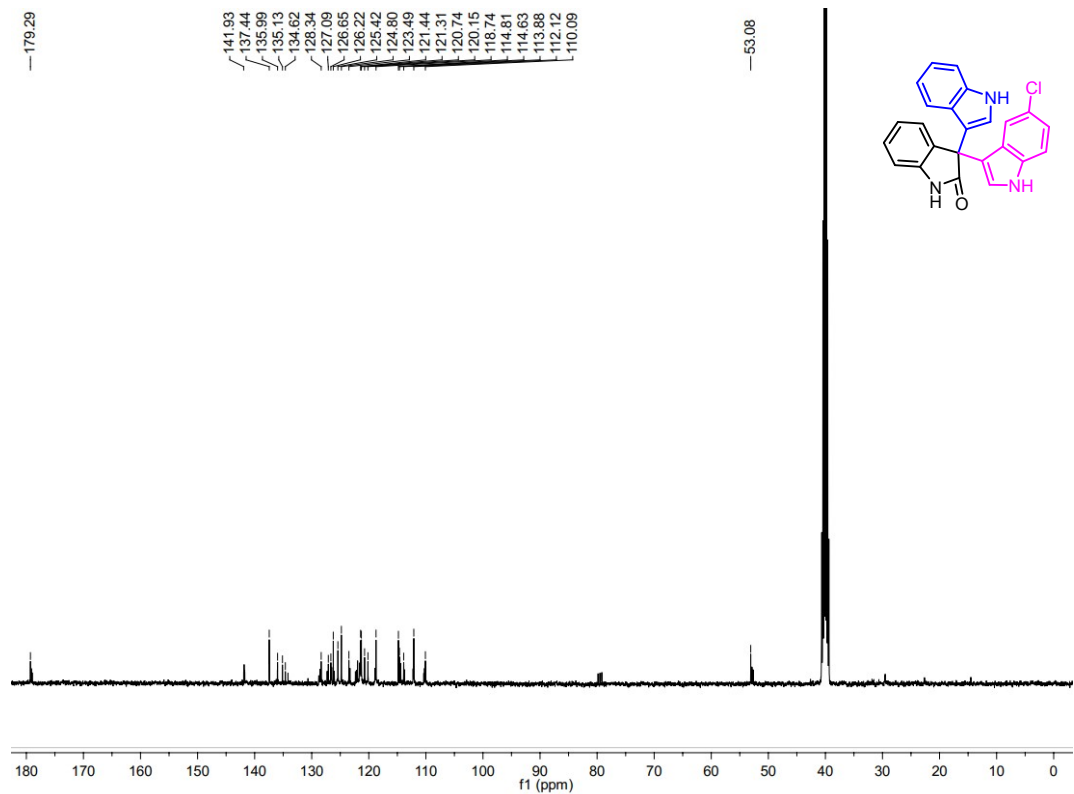

# $^1\text{H}$ and $^{13}\text{C}$ -NMR spectra of 4e

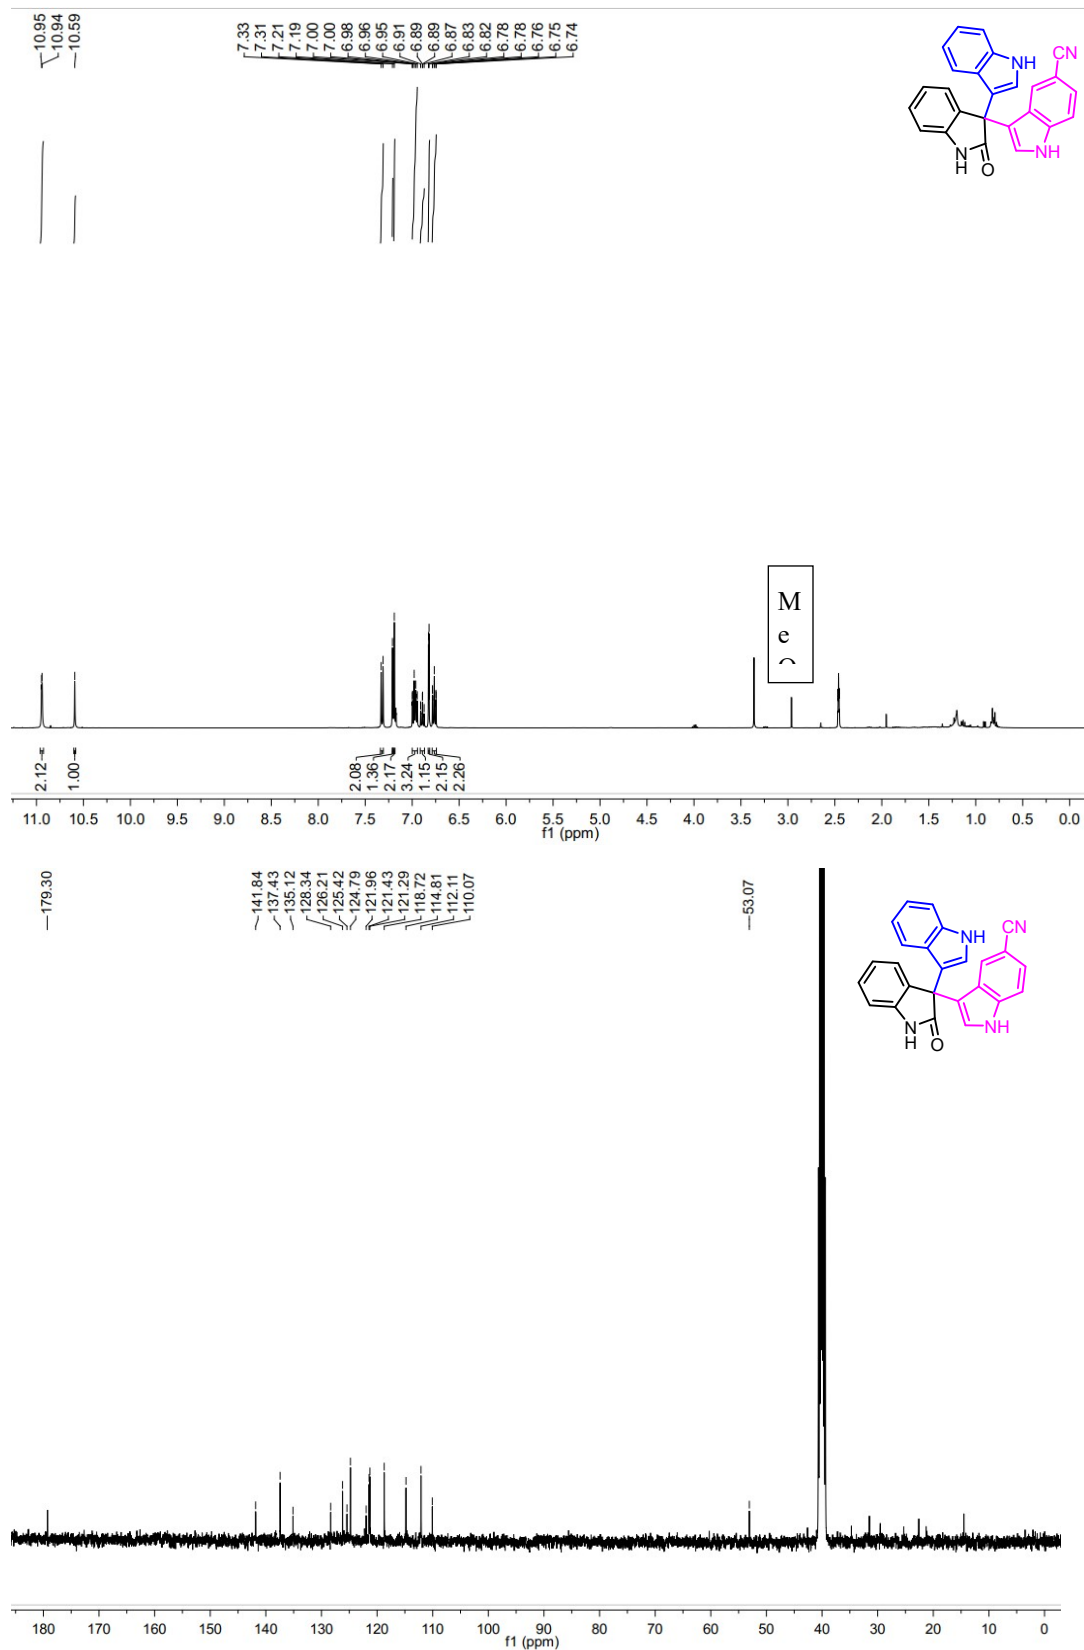

# <sup>1</sup>H and <sup>13</sup>C-NMR spectra of 4f

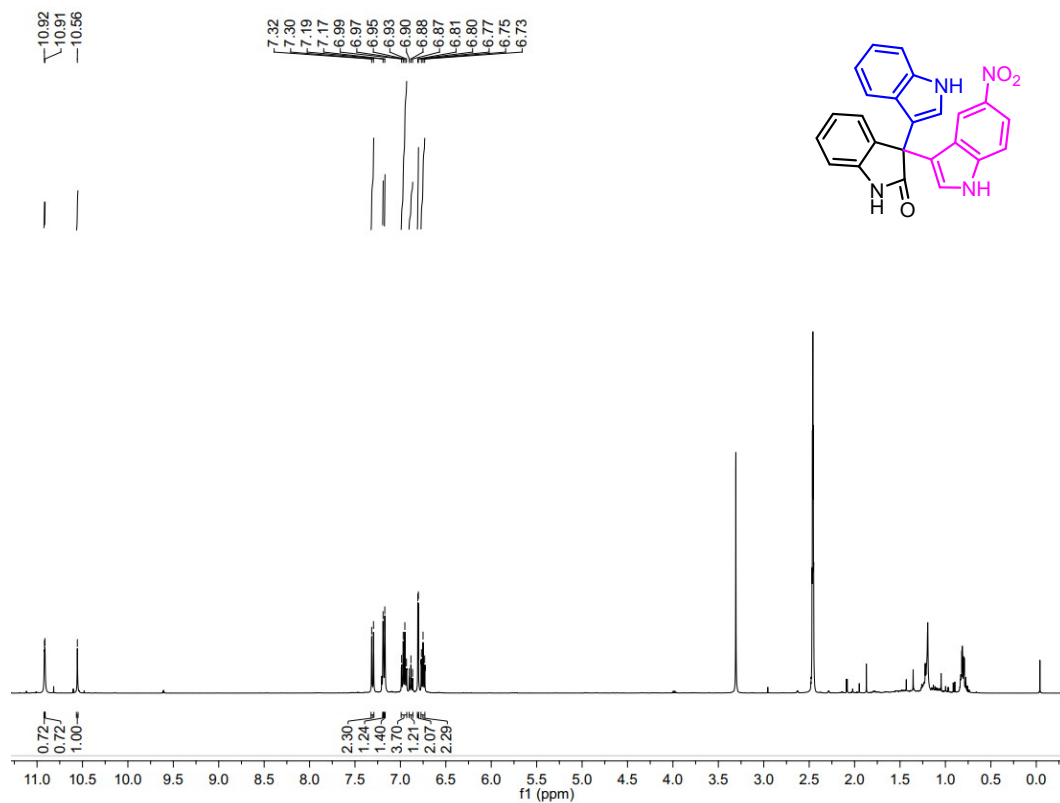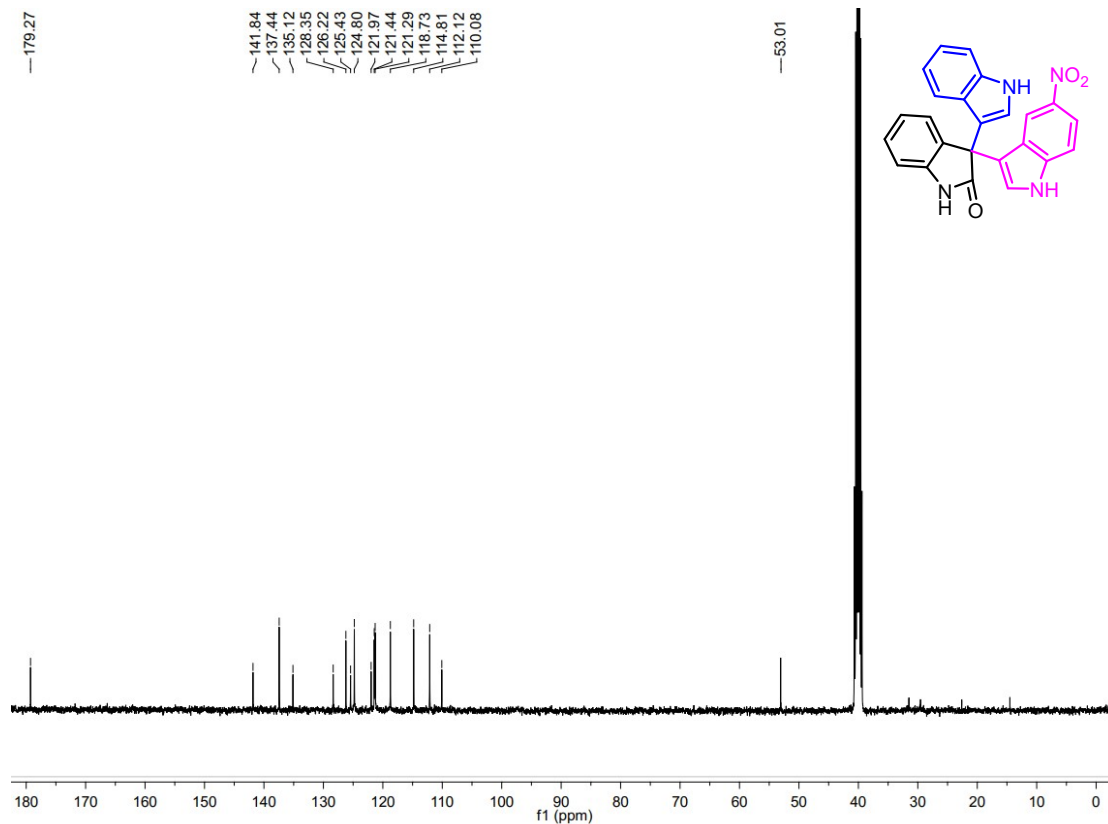

# <sup>1</sup>H and <sup>13</sup>C-NMR spectra of 4g

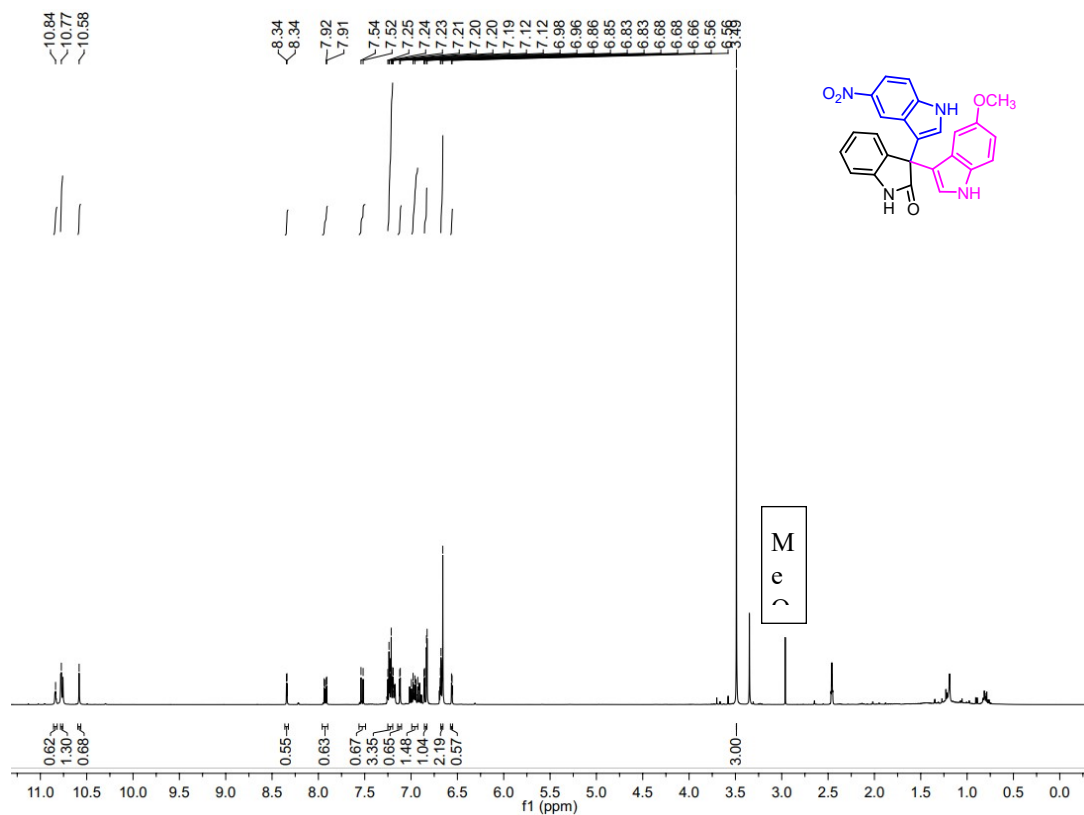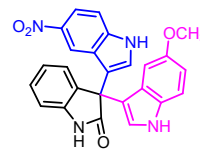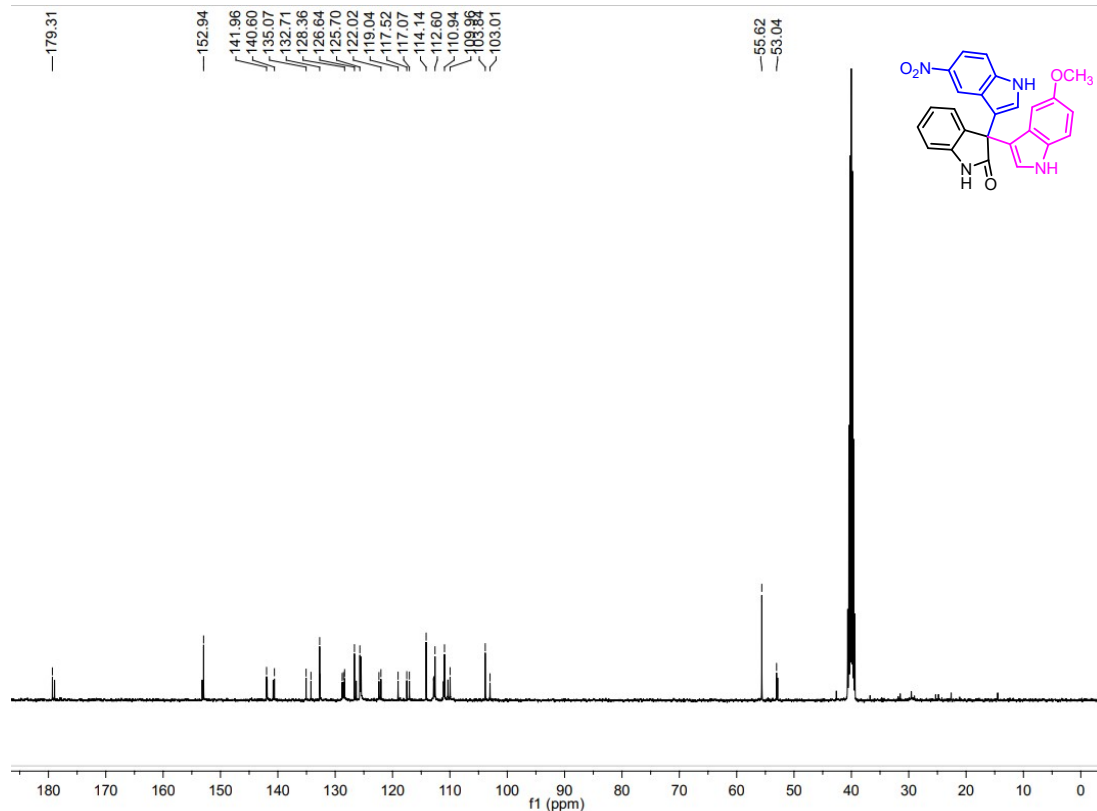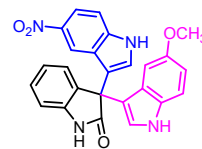



# <sup>1</sup>H and <sup>13</sup>C-NMR spectra of 4h

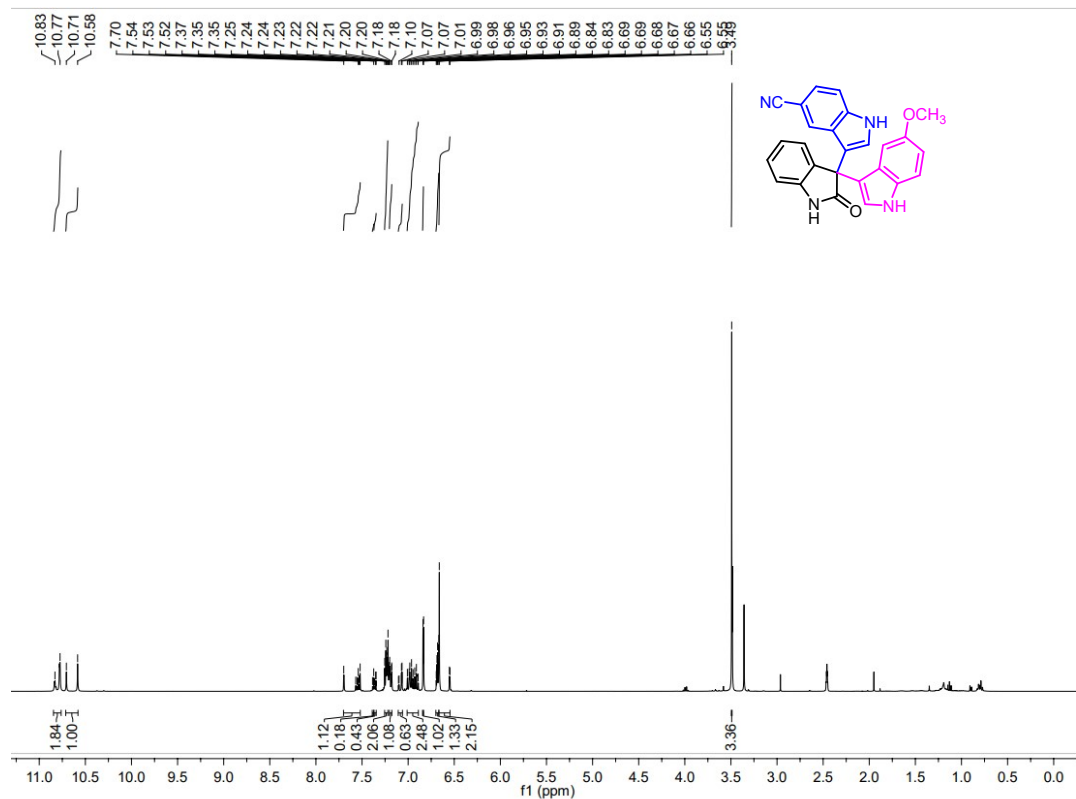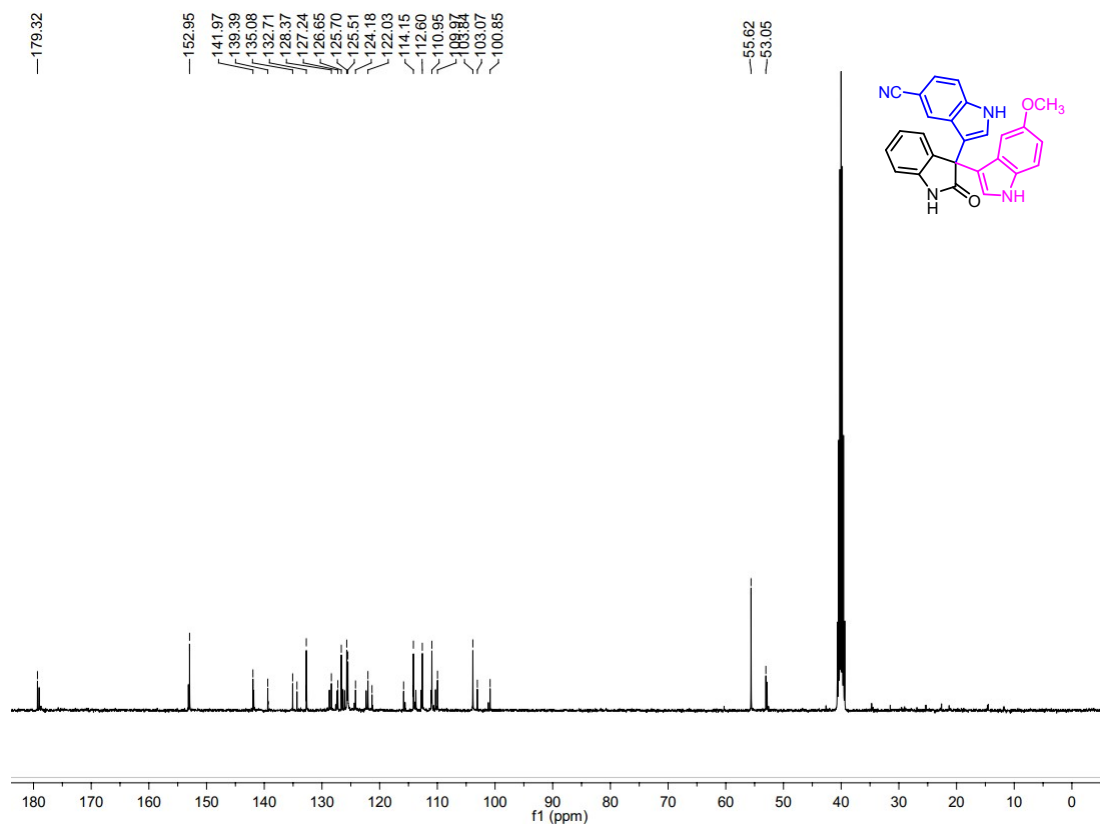

# <sup>1</sup>H and <sup>13</sup>C-NMR spectra of 4i

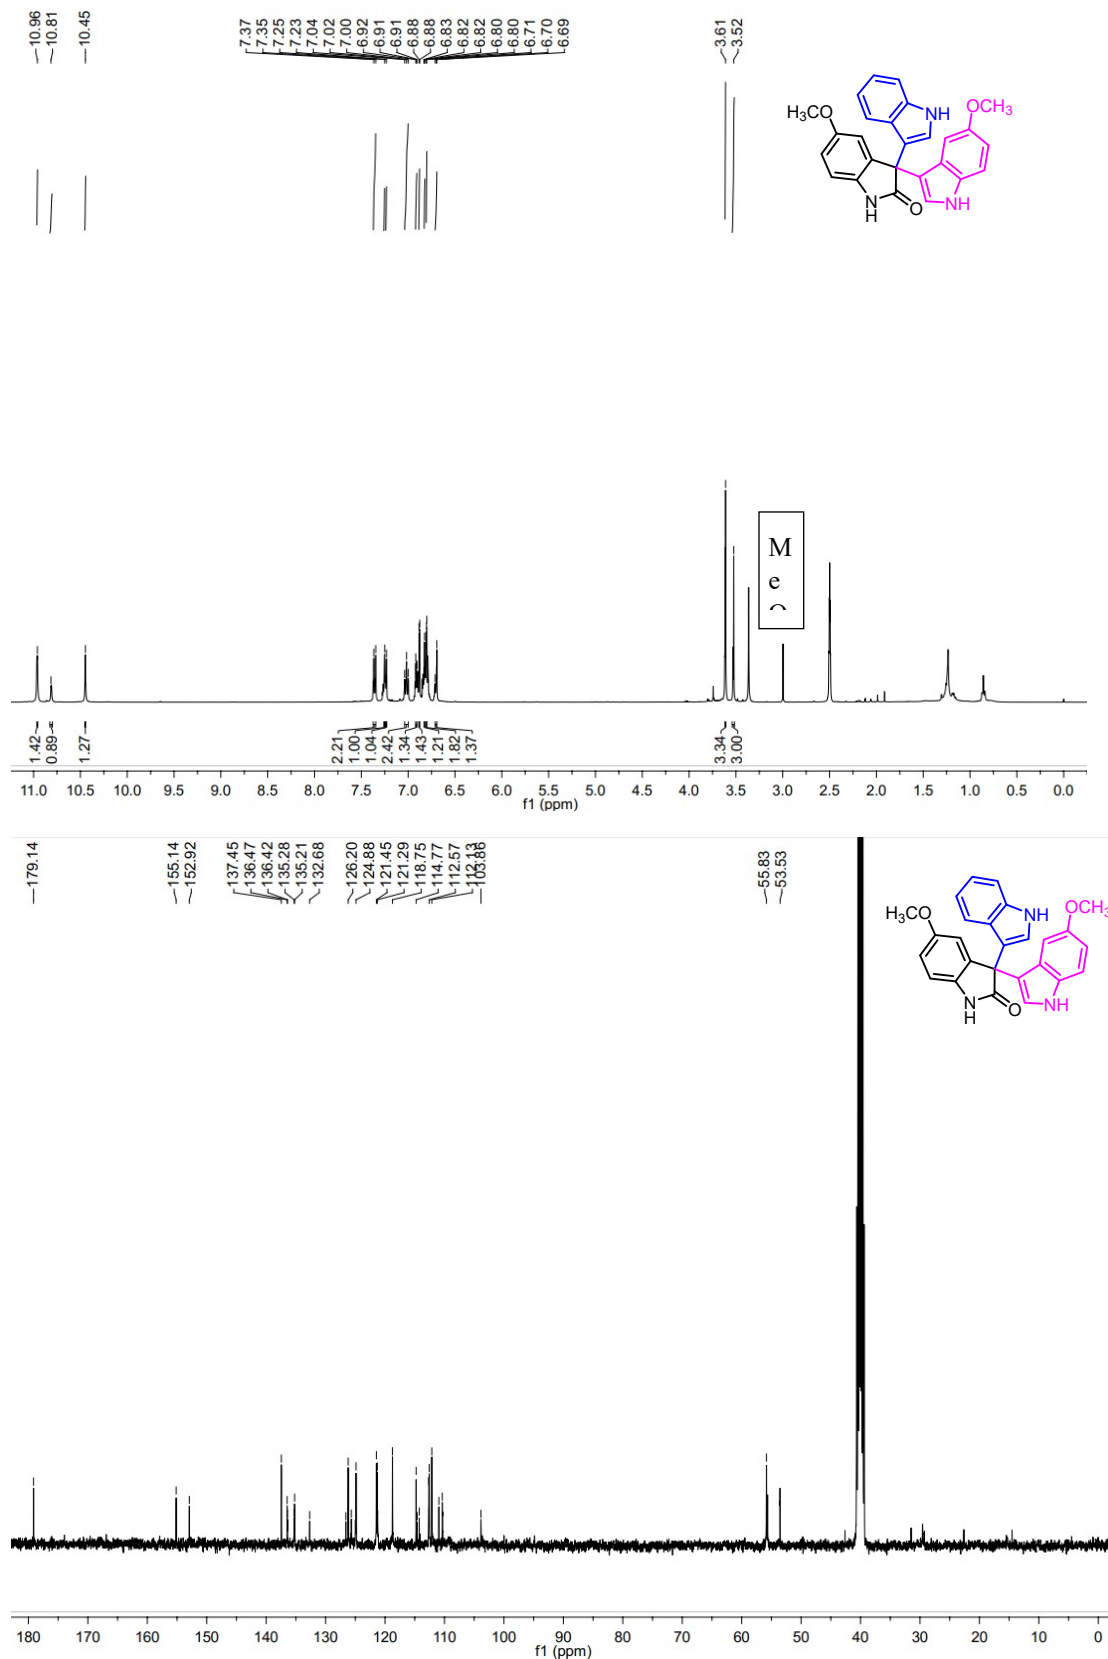

# <sup>1</sup>H and <sup>13</sup>C-NMR spectra of 4j

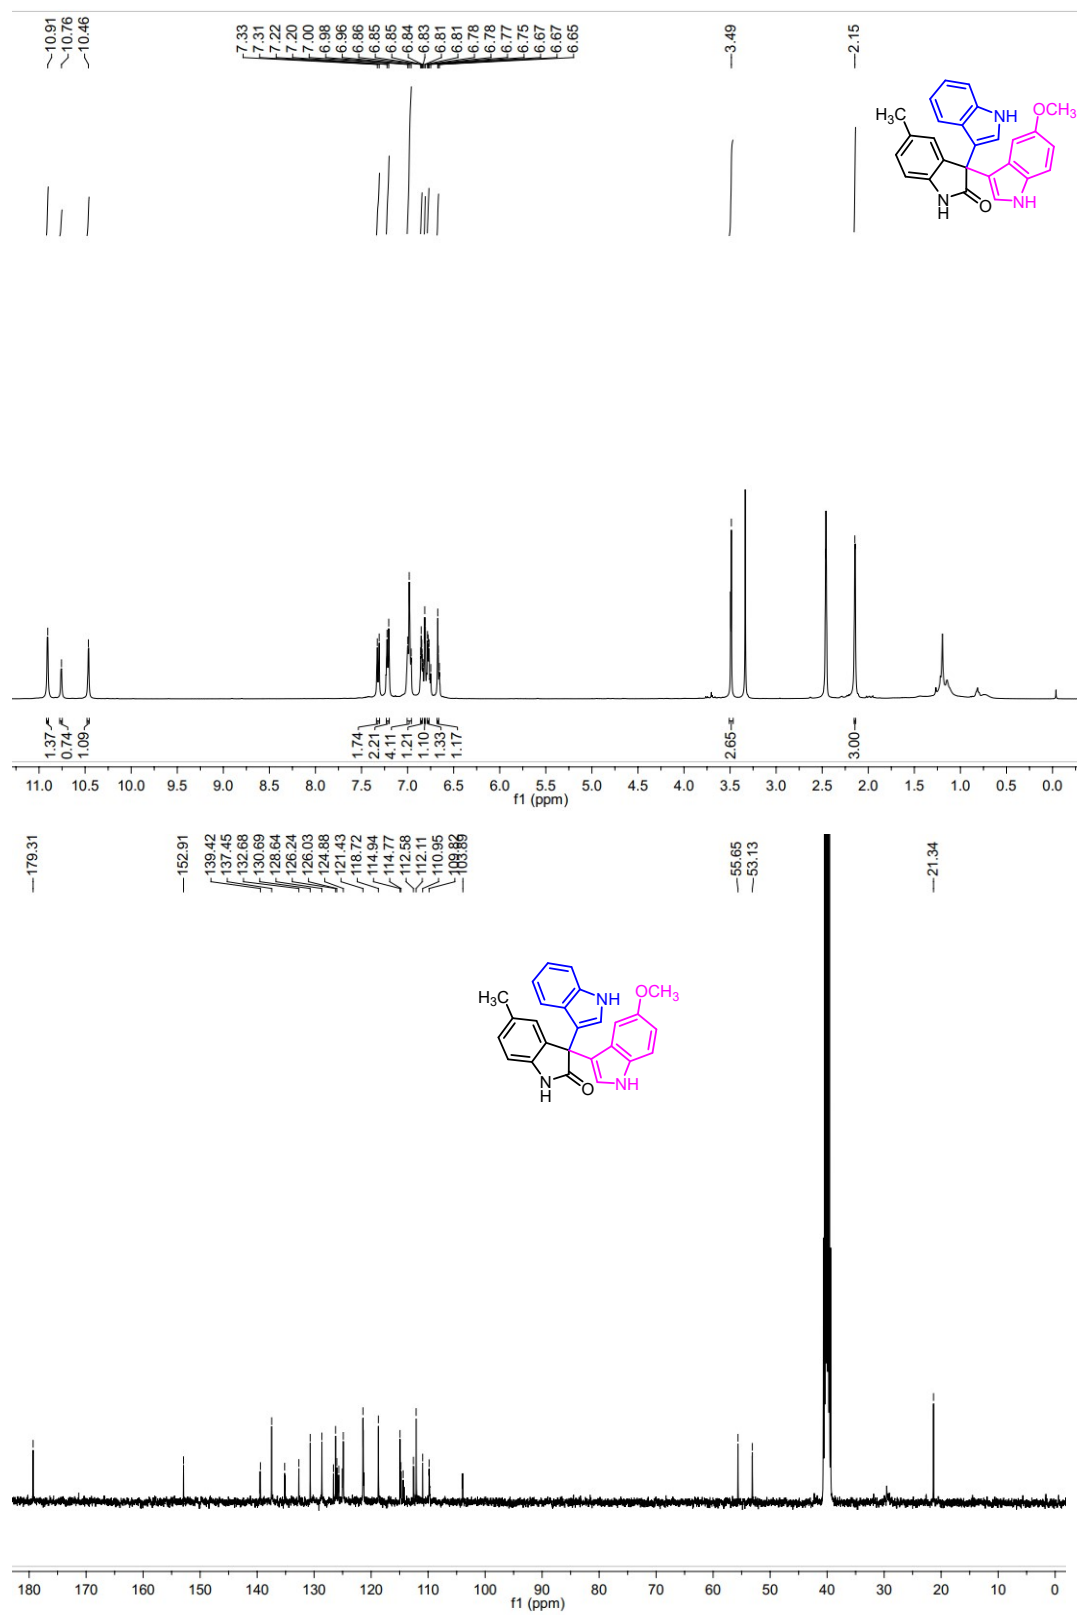

# <sup>1</sup>H and <sup>13</sup>C-NMR spectra of 4k

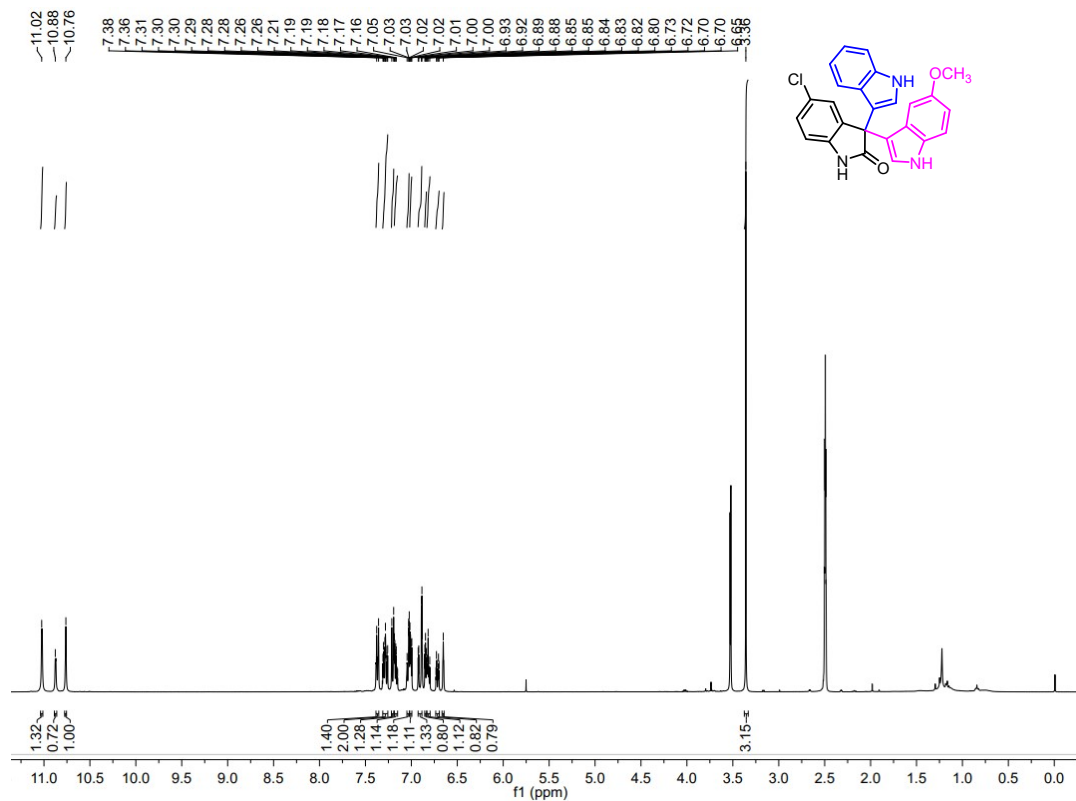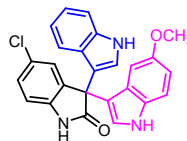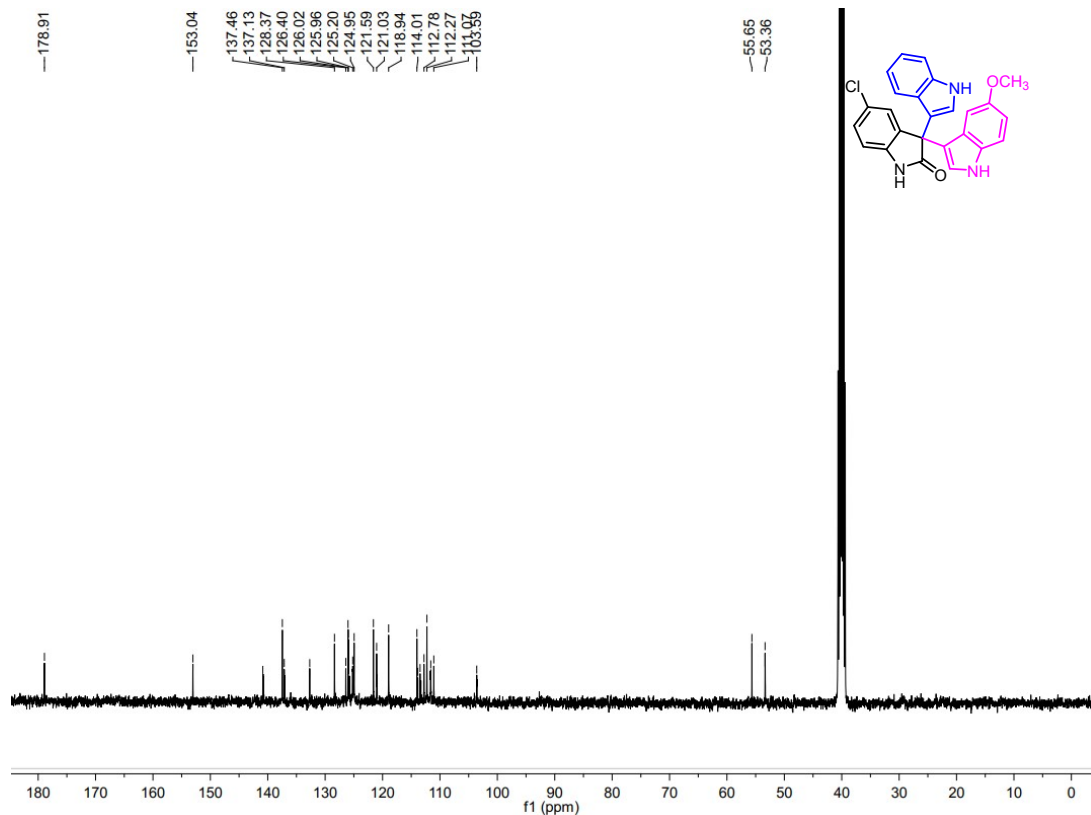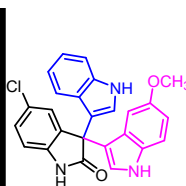

# $^1\text{H}$ and $^{13}\text{C}$ -NMR spectra of 4l

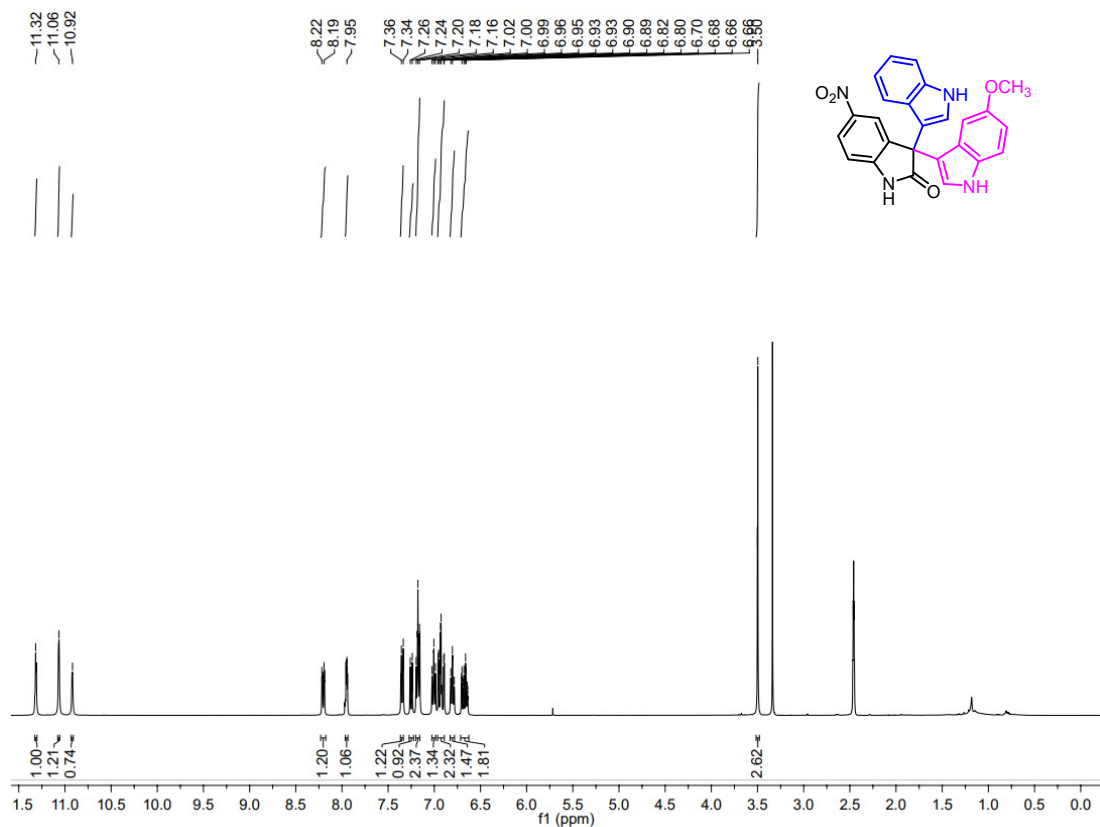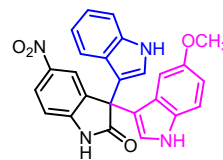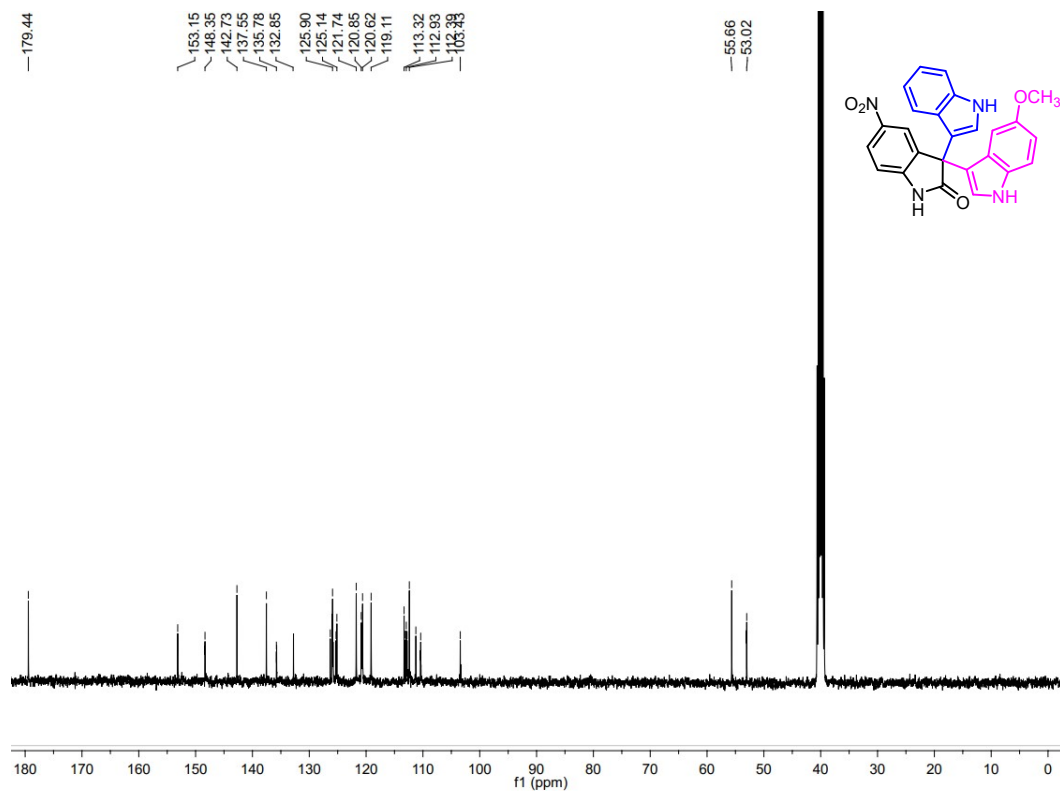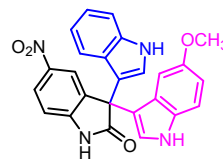

# $^1\text{H}$ and $^{13}\text{C}$ -NMR spectra of 4m

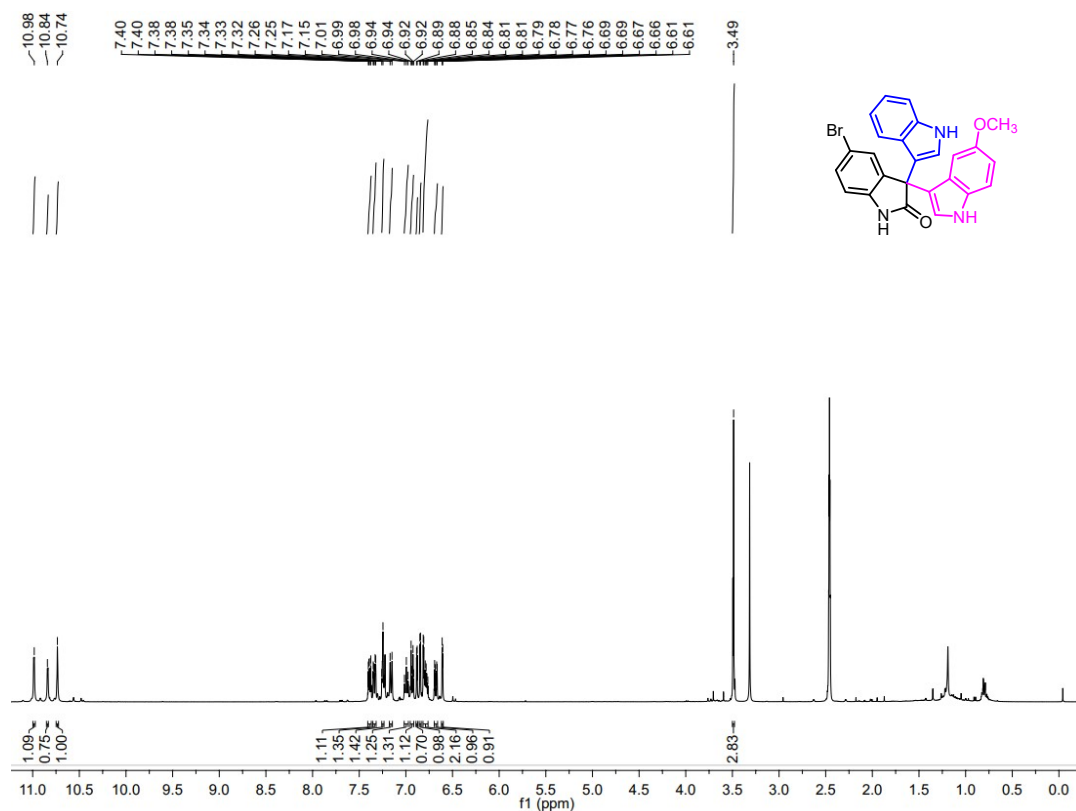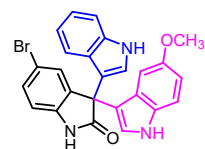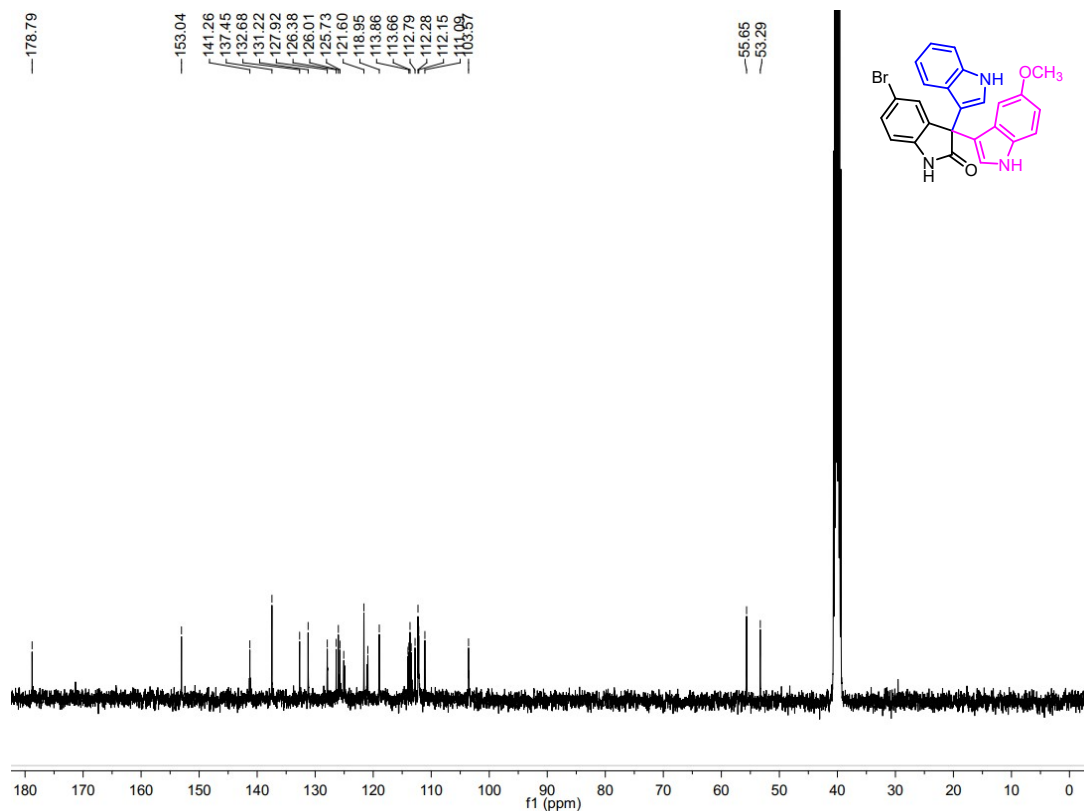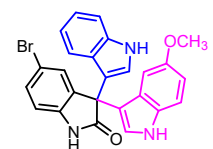

# <sup>1</sup>H and <sup>13</sup>C-NMR spectra of 4n

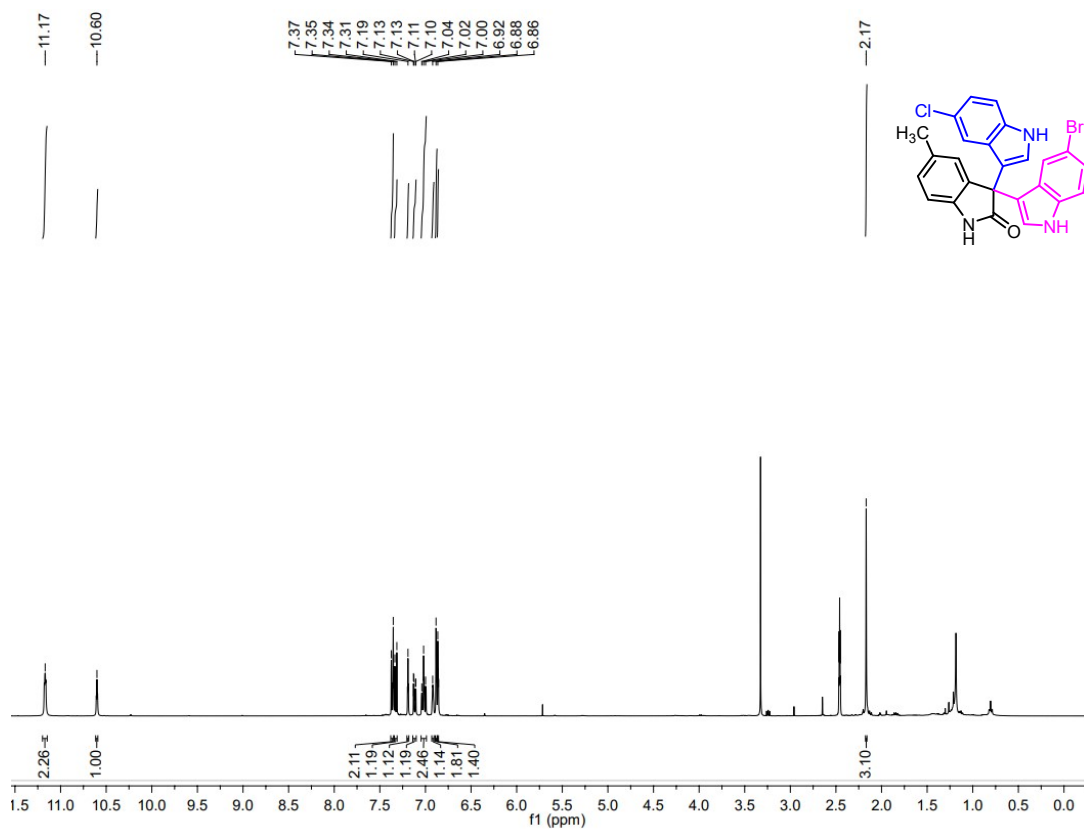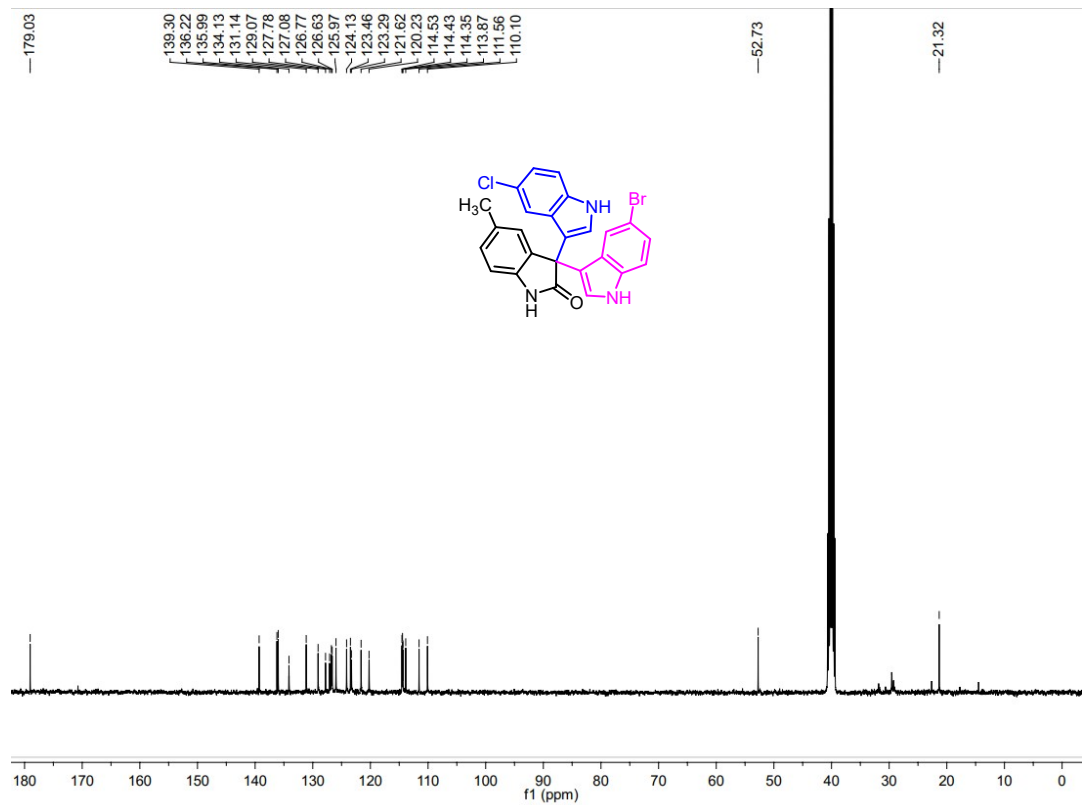





# $^1\text{H}$ and $^{13}\text{C}$ -NMR spectra of 4p

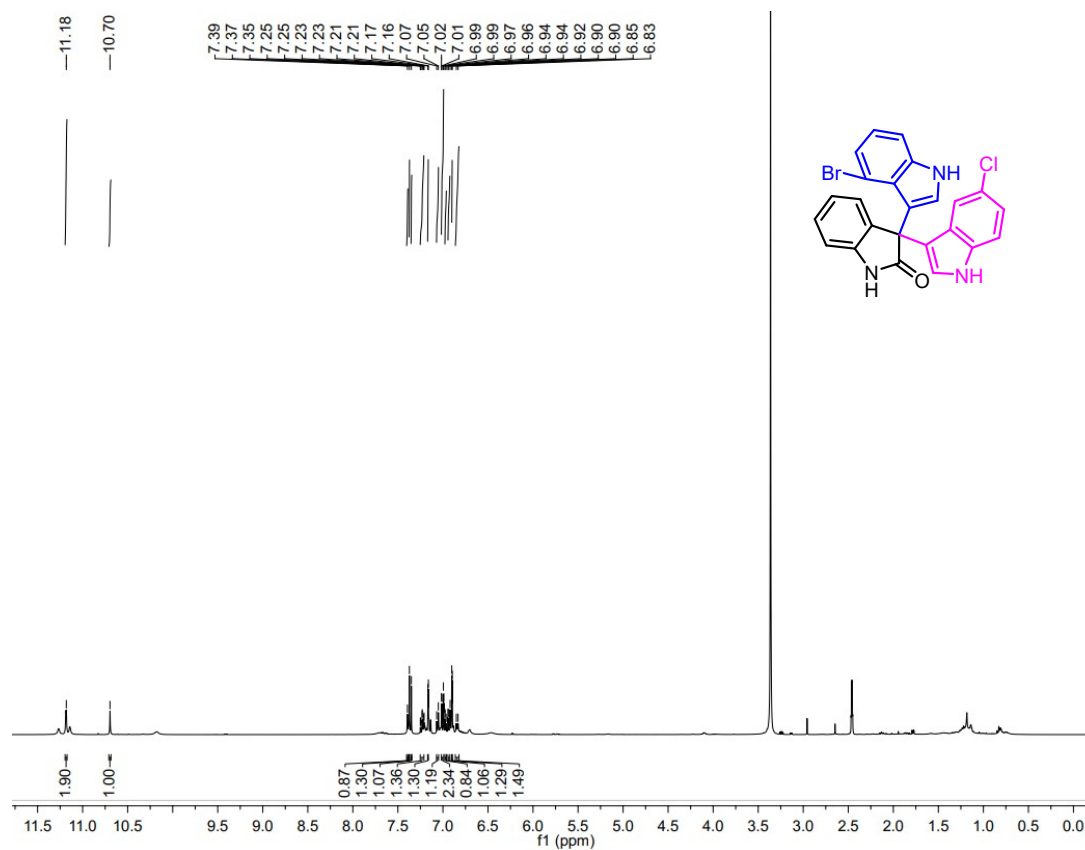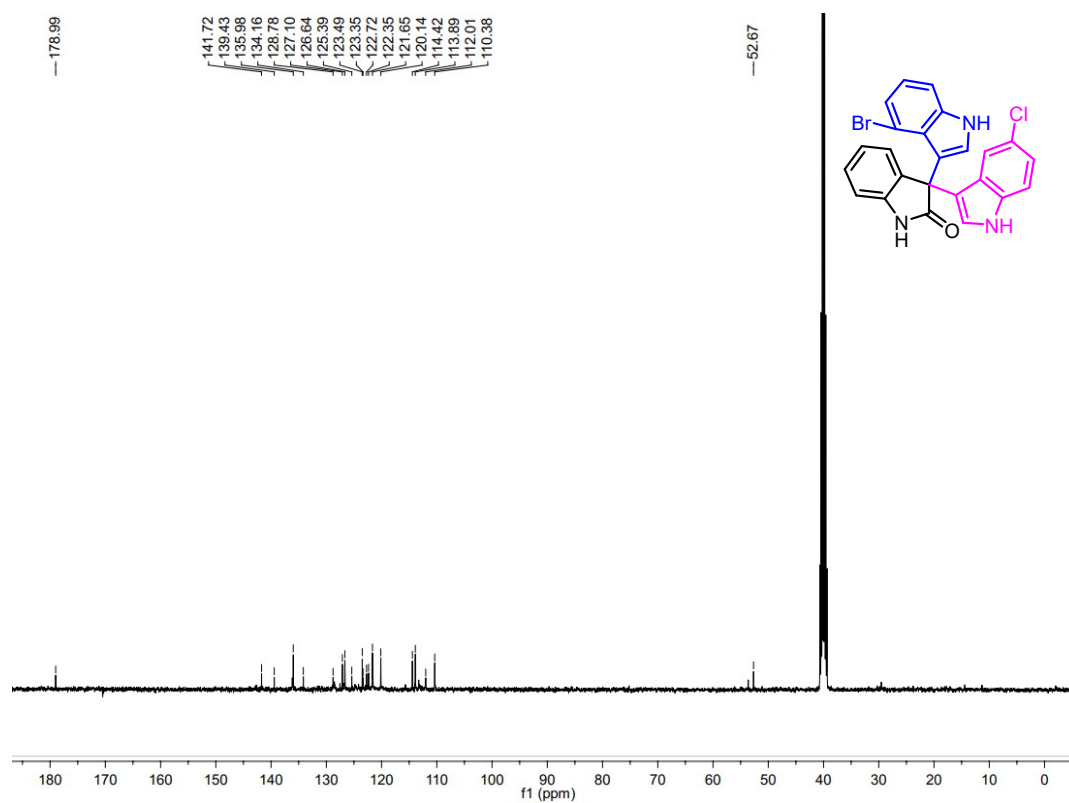

# <sup>1</sup>H and <sup>13</sup>C-NMR spectra of 4q

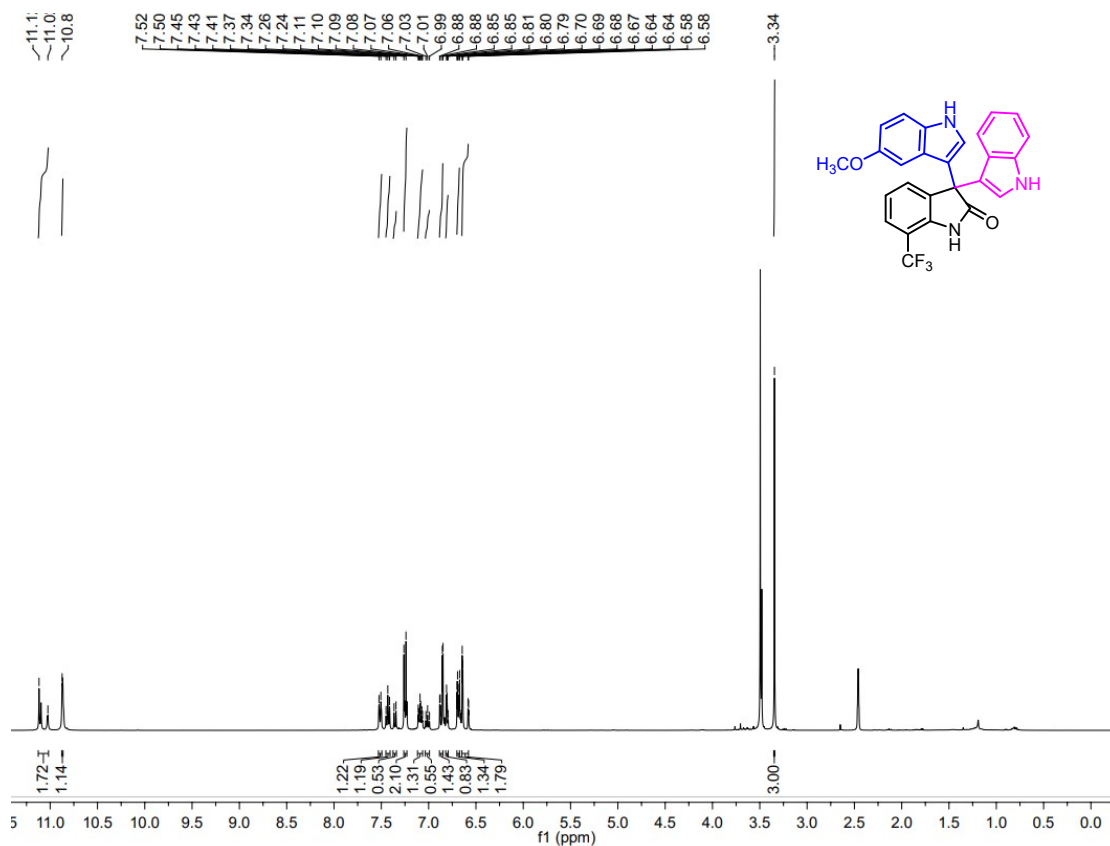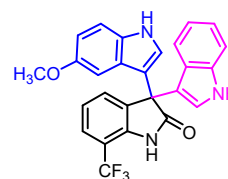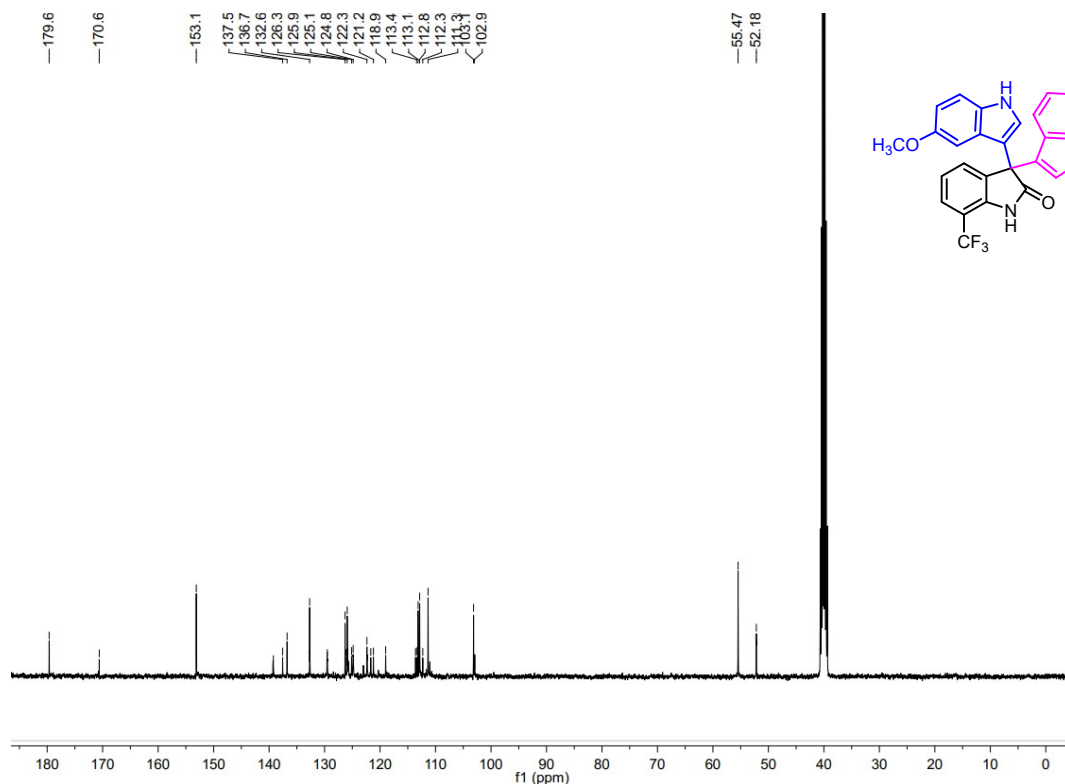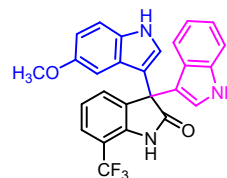

# <sup>1</sup>H and <sup>13</sup>C-NMR spectra of 4r

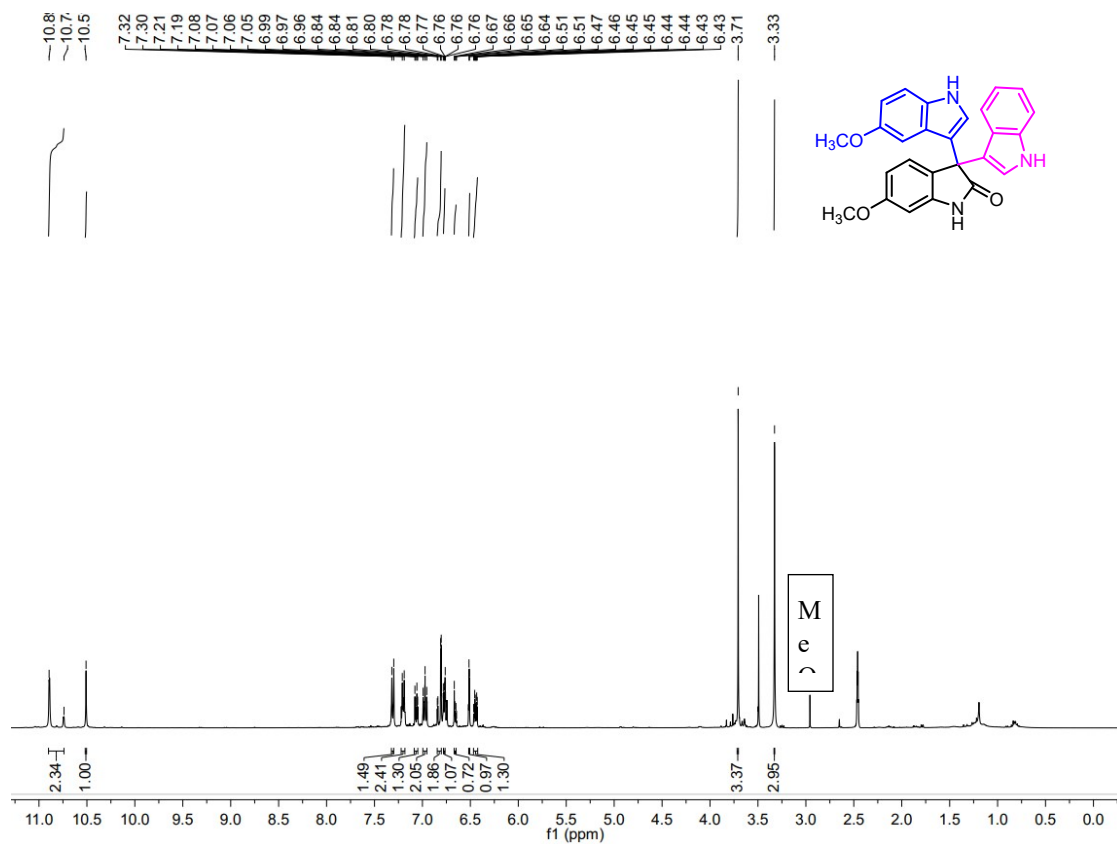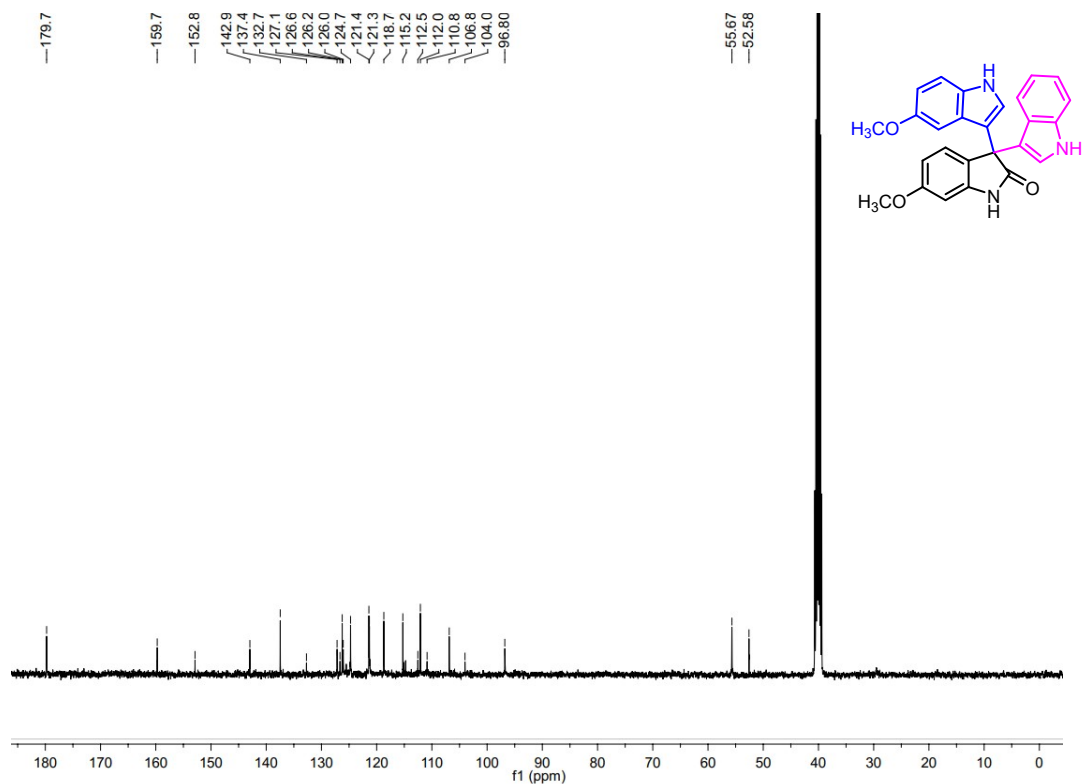

# $^1\text{H}$ and $^{13}\text{C}$ -NMR spectra of 4s

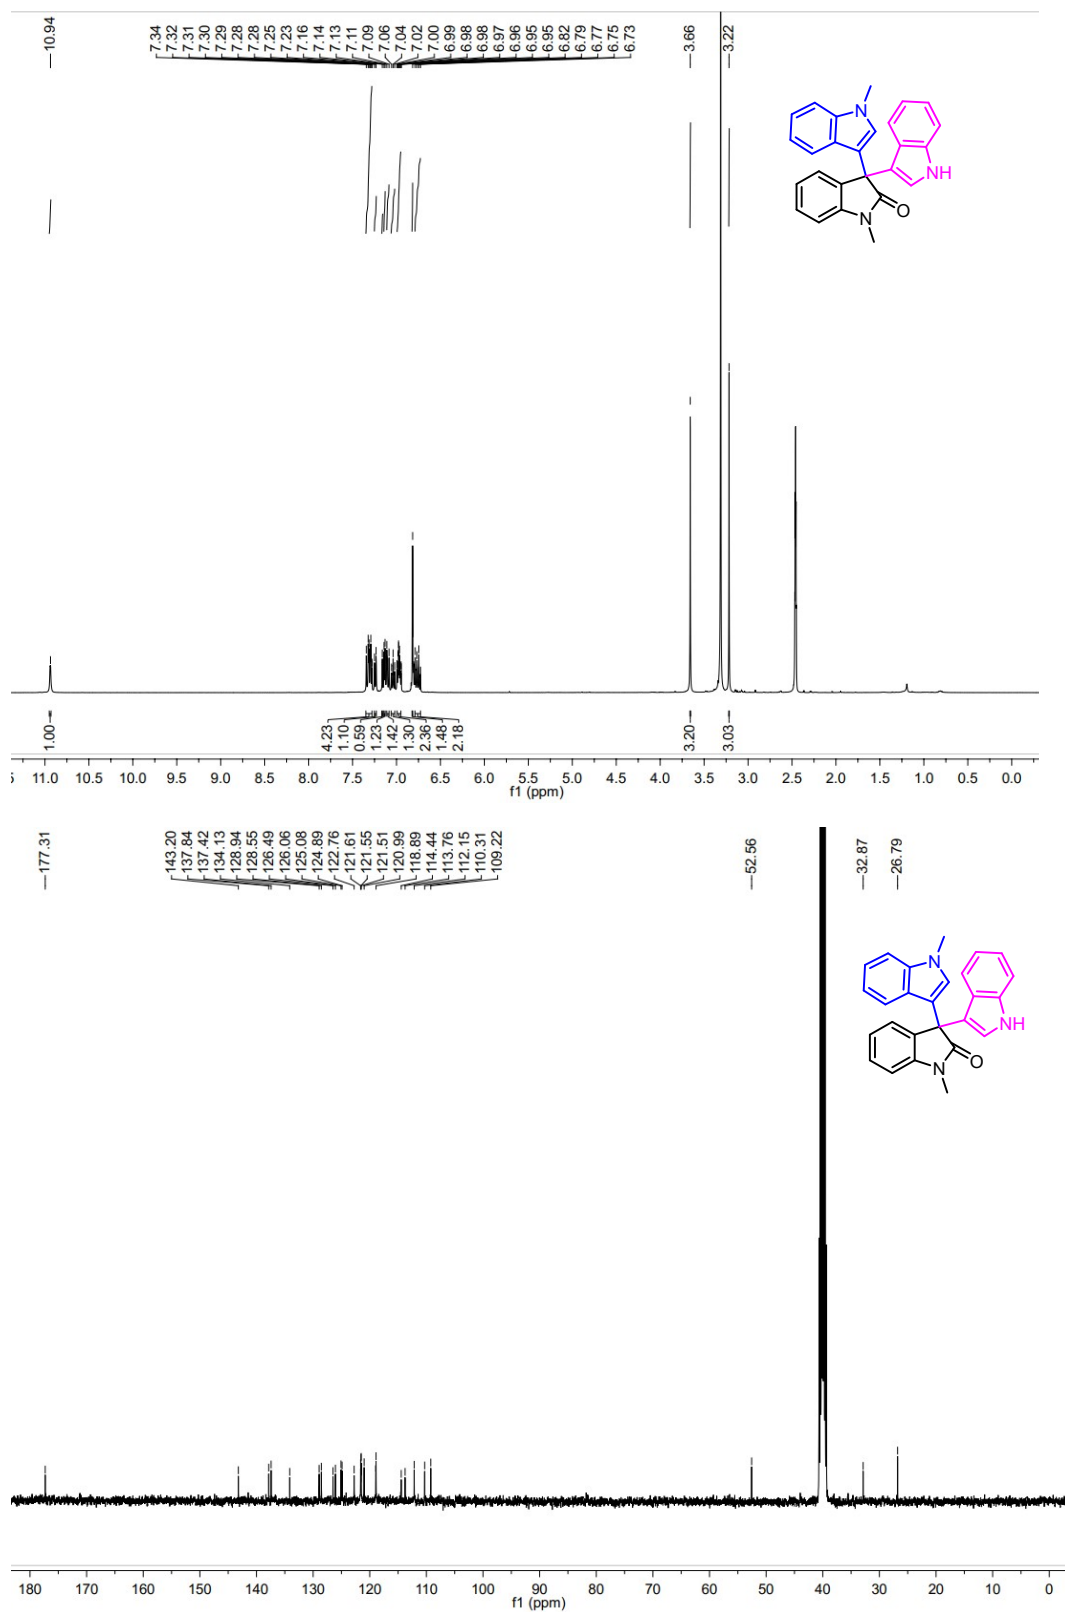

## Computational Details:

### Molecular docking:

The PDB of hydrolase  $\alpha$ -amylase from *Aspergillus oryzae* (PDB id: 6TAA, EC 3.2.1.1)<sup>1</sup> having resolution 2.1Å was collected from the RCSB protein data bank. The substrates indole, isatin, and intermediates involved in the mechanism were optimized with the B3LYP/6-31+G\*\* level of theory using Gaussian 16<sup>2</sup> in the gas phase. The enzyme 6TAA consists of a single polypeptide chain of 476 amino-acid residues. The pocket containing amino-acids Glu162, Asp175, Asp206, His210, and Glu230 were predicted as the active site by the web version of SCFBio program<sup>3</sup>. The substrates were docked using AutoDock Vina program<sup>4</sup>. The interactions and orientation of the substrates at the active site of the protein were visualized by PyMOL<sup>5</sup>. In order to accurately forecast all possible interactions, we have not established any constraints in this work.

### Molecular Dynamics:

We then proceed to molecular dynamics simulation with the most favorable orientation predicted from docking analysis. The protonation states of the titratable residues Glu, His, and Asp of enzymes were assigned based on pKa values obtained from the PROPKA software<sup>6</sup>. The missing hydrogen atoms were added using the Leap module of AMBER 20<sup>7</sup>. For all substrates, the general AMBER force field (GAFF)<sup>8</sup> was employed. The complexes were solvated in a TIP3P explicit water box<sup>9</sup> with a minimum cutoff of 10 Å from the protein border was used to solvate the resultant system, overall was neutralized by adding twenty-three Na<sup>+</sup> ions. The Amber ff99SB force field<sup>10</sup> for the protein was used in all MD simulations. The energy of the system was minimized by 1000 steps of steepest descent 5000 steps of conjugate gradients. The minimized system was heated to room temperature under the canonical ensemble with a weak restraint of 5 Å, followed by 1 ns of density equilibration under isothermal–isobaric ensemble at the target temperature and pressure of 300K and 1.0 atm using Langevin<sup>11</sup> dynamics and the Berendsen barostat<sup>12</sup> with collision frequency of 2 ps and a pressure-relaxation time of 1 ps. Finally, the system underwent 50 ns of MD simulations with the GPU version of the AMBER 20<sup>7</sup>. The covalent bonds containing hydrogen atoms were constrained using SHAKE<sup>13</sup>, and particle mesh Ewald (PME)<sup>14</sup> was used to compute long-range electrostatic interactions. We have used an integration step of 2 fs during the entire MD simulations. The trajectory and RMSD were analysed by the CPPTRAJ<sup>15</sup> module of

AMBER and the favorable orientation and interaction of protein-substrate complex were visualized using VMD<sup>16</sup>.

### RMSD Analysis:

In this work, mass weighted RMSD using the first frame as a reference has been plotted for the protein backbone along with substrates using QtGrace<sup>17</sup>. The figures S1 and S2 represent the standard deviation with respect to the first frame throughout the trajectory for 50 ns MD stimulation. The X axis is the frame number, and the Y axis is the coordinate RMSD to the first frame (Å). At frame 1300, the RMSD jumps up quickly this corresponds to the release of harmonic restraints on the protein backbone. However, overall RMSD distribution exists within the range of ~1.8 Å.

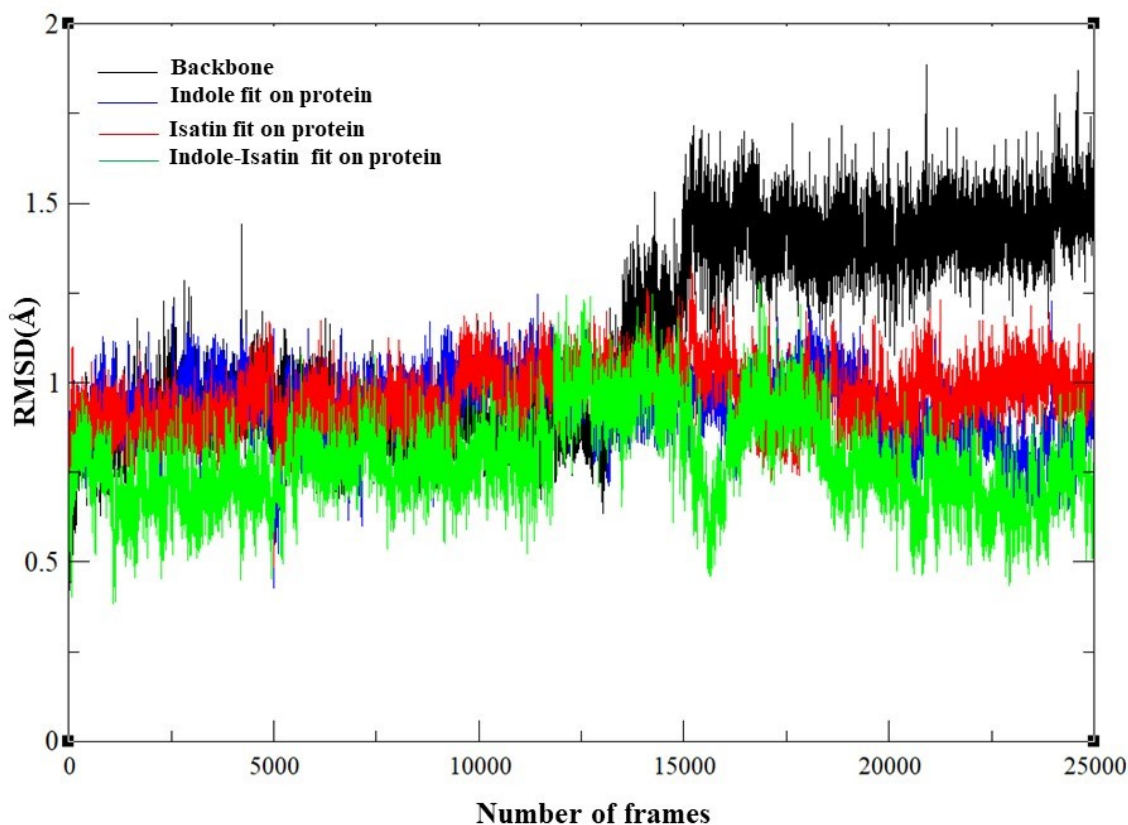

Figure S1: RMSD of *α*-amylase *Aspergillus oryzae* with substrate indole, isatin both indole and isatin respectively.

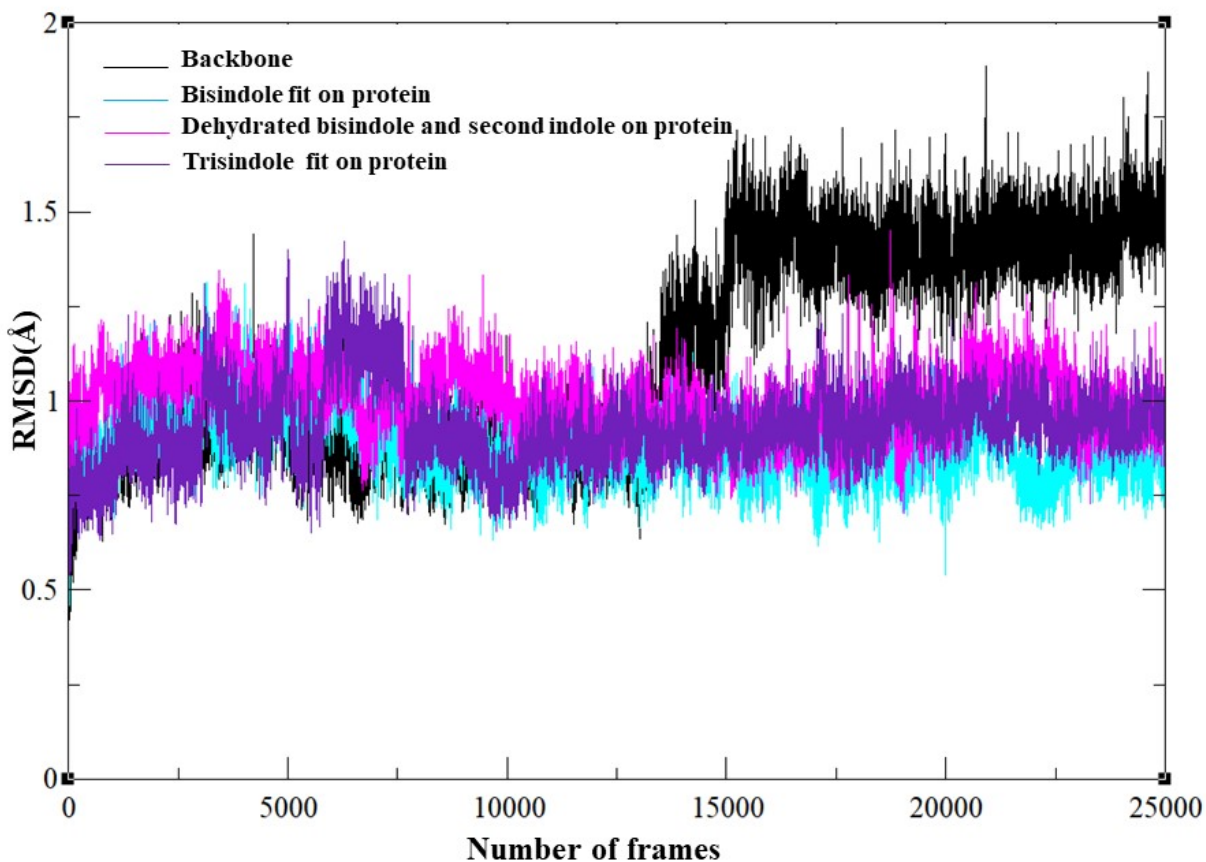

Figure S2: RMSD of  $\alpha$ -amylase *Aspergillus oryzae* with bisindole, dehydrated bisindole with second indole, and product trisindole respectively.

### DFT Study:

The geometry optimization for reactants, transition structure, and major product were done by DFT-B3LYP method which uses Becke's three parameter hybrid exchange correlation functional along with the Lee, Yang and Parr (LYP) correlation functional<sup>18</sup> using Pople's double zeta 6-31+G(d,p) basis set<sup>19</sup> by Gaussian 16<sup>2</sup> package. Frequency calculations were carried out at the same level of theory. The transition structures were located through a combination of scans of bond distance and dihedral angle for C-C bond formation.

## PES

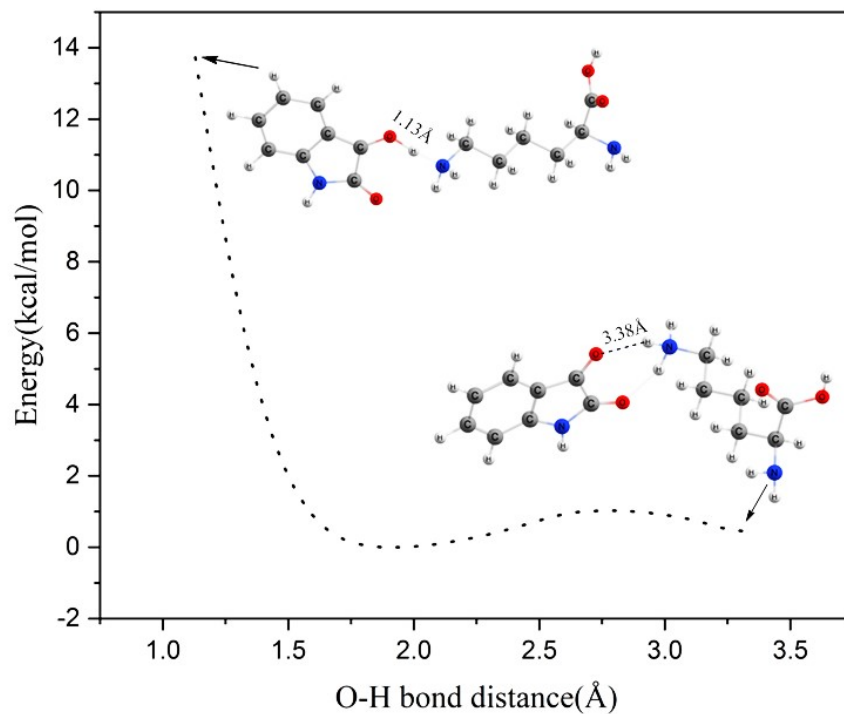

Figure S3: Relaxed potential energy surface scan for O-H proton abstraction from Lysine to isatin.

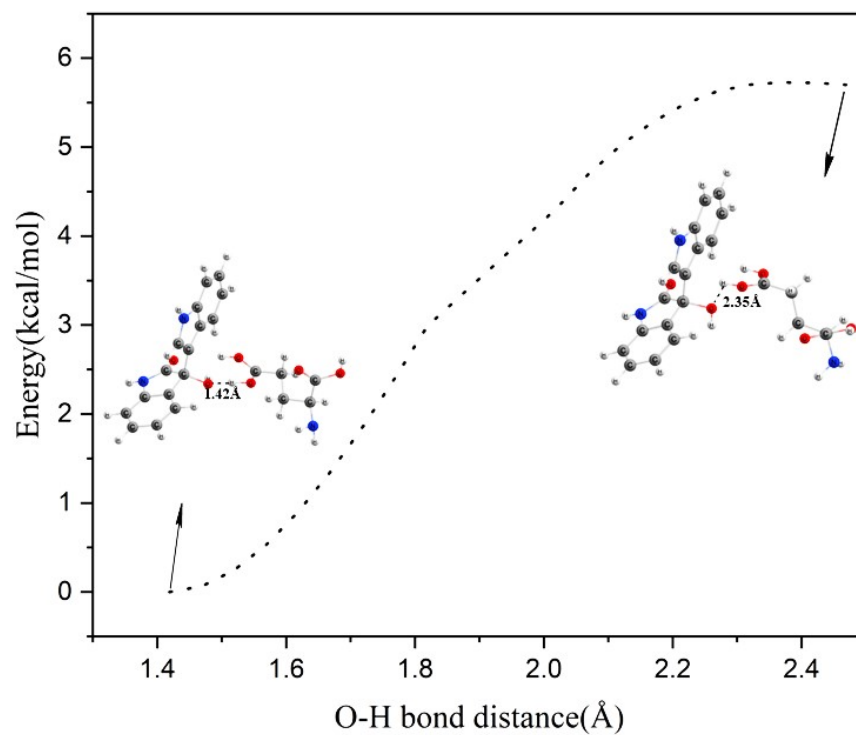

Figure S4: Relaxed potential energy surface for O-H bond distance between bisindole-intermediate(D) with Glutamic acid.



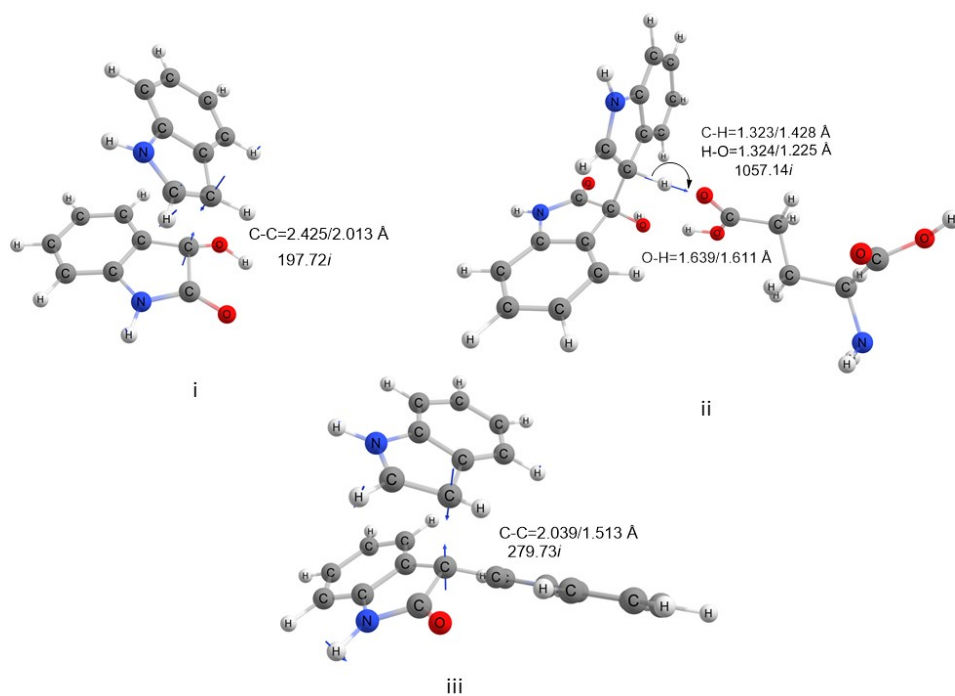

Figure S5: TS1, TS2, TS3 with imaginary frequency respectively.

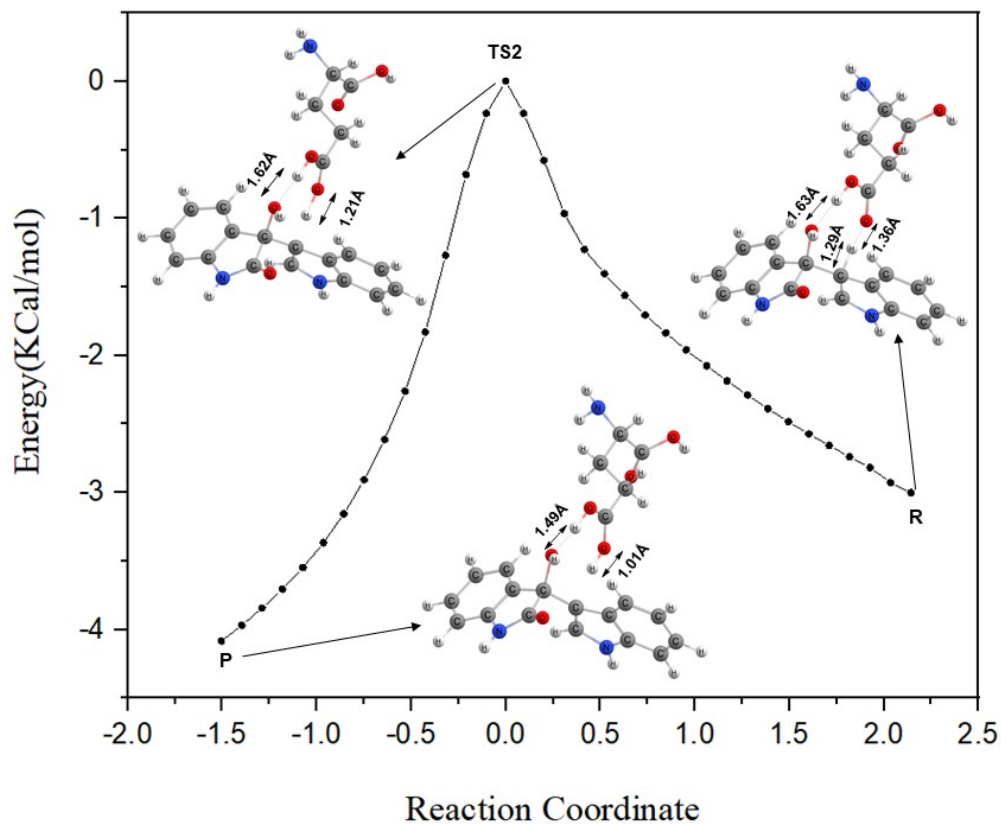

Figure S6: Intrinsic Reaction Coordinate for TS2

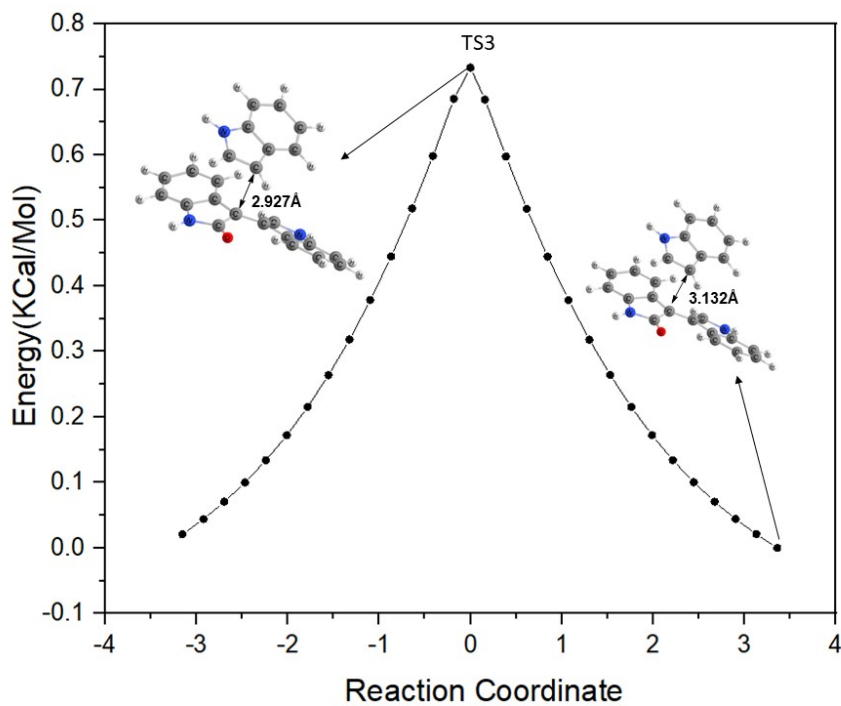

Figure S7: Intrinsic Reaction Coordinate for TS3

| File Name               | ZPE             | E                   | E + ZPE             | $\Delta(E+ZPE)$ in au | $\Delta(E+ZPE)$ in kcal | G(298K)             | $\Delta G$ in au | $\Delta G$ in kcal |
|-------------------------|-----------------|---------------------|---------------------|-----------------------|-------------------------|---------------------|------------------|--------------------|
| LYS                     | 0.225848        | -497.4378898        | -497.2120418        |                       |                         | -497.252069         |                  |                    |
| LYS-H<br>(deprotonated) | 0.210954        | -497.0755796        | -496.8646256        |                       |                         | -496.904218         |                  |                    |
| 1a                      | 0.115118        | -513.0949378        | -512.9798198        |                       |                         | -513.012869         |                  |                    |
| A                       | 0.127589        | -513.4213953        | -513.2938063        |                       |                         | -513.32696          |                  |                    |
| 2a                      | 0.129619        | -363.8450759        | -363.7154569        |                       |                         | -363.745786         |                  |                    |
| IM1                     | 0.258498        | -877.2942721        | -877.0357741        |                       |                         | -877.081578         |                  |                    |
| <b>TS1</b>              | <b>0.259213</b> | <b>-877.29102</b>   | <b>-877.031807</b>  |                       |                         | <b>-877.075036</b>  |                  |                    |
| B                       | 0.260832        | -877.3046862        | -877.0438542        |                       |                         | -877.08674          |                  |                    |
| GLU                     | 0.151636        | -551.6711258        | -551.5194898        |                       |                         | -551.558348         |                  |                    |
| C                       | 0.413474        | -1428.991104        | -1428.57763         |                       |                         | -1428.642376        |                  |                    |
| <b>TS2</b>              | <b>0.409055</b> | <b>-1428.981664</b> | <b>-1428.572609</b> |                       |                         | <b>-1428.635006</b> |                  |                    |
| D                       | 0.412431        | -1428.99161         | -1428.579179        |                       |                         | -1428.642269        |                  |                    |
| E                       | 0.543175        | -1792.852906        | -1792.309731        |                       |                         | -1792.383945        |                  |                    |
| F                       | 0.364336        | -1164.737186        | -1164.37285         |                       |                         | -1164.427753        |                  |                    |
| <b>TS3</b>              | <b>0.36541</b>  | <b>-1164.724847</b> | <b>-1164.359437</b> |                       |                         | <b>-1164.409066</b> |                  |                    |
| H2O                     | 0.021288        | -76.4340489         | -76.4127609         |                       |                         | -76.430409          |                  |                    |
| G                       | 0.366694        | -1164.733256        | -1164.366562        |                       |                         | -1164.41654         |                  |                    |
| 3a                      | 0.353568        | -1164.369176        | -1164.015608        |                       |                         | -1164.065711        |                  |                    |

| Atom Balance              | ZPE             | E                   | E + ZPE             | $\Delta(E+ZPE)$ in au | $\Delta(E+ZPE)$ in kcal | G(298K)             | $\Delta G$ in au | $\Delta G$ in kcal |
|---------------------------|-----------------|---------------------|---------------------|-----------------------|-------------------------|---------------------|------------------|--------------------|
| <b>1a+2a+LYS</b>          | <b>0.470585</b> | <b>-1374.377904</b> | <b>-1373.907319</b> | <b>0</b>              | <b>0</b>                | <b>-1374.010724</b> | <b>0</b>         | <b>0</b>           |
| <b>IM1+LYS-(H)</b>        | <b>0.469452</b> | <b>-1374.369852</b> | <b>-1373.9004</b>   | <b>0.0069188</b>      | <b>4.341547</b>         | <b>-1373.985796</b> | <b>0.024928</b>  | <b>15.64232</b>    |
| <b>TS1+LYS-(H)</b>        | <b>0.470167</b> | <b>-1374.3666</b>   | <b>-1373.896433</b> | <b>0.0108859</b>      | <b>6.83090225</b>       | <b>-1373.979254</b> | <b>0.03147</b>   | <b>19.747425</b>   |
| <b>B+LYS-(H)</b>          | <b>0.471786</b> | <b>-1373.90848</b>  | <b>-1373.90848</b>  | <b>-0.0011613</b>     | <b>-0.72871575</b>      | <b>-1373.990958</b> | <b>0.019766</b>  | <b>12.403165</b>   |
| <b>1a+2a+LYS +GLU</b>     | <b>0.622221</b> | <b>-1926.049029</b> | <b>-1925.426808</b> | <b>0</b>              | <b>0</b>                | <b>-1925.569072</b> | <b>0</b>         | <b>0</b>           |
| <b>C+LYS-(H)</b>          | <b>0.624428</b> | <b>-1926.066683</b> | <b>-1925.442255</b> | <b>-0.0154469</b>     | <b>-9.69292975</b>      | <b>-1925.546594</b> | <b>0.022478</b>  | <b>14.104945</b>   |
| <b>TS2+LYS-(H)</b>        | <b>0.620009</b> | <b>-1926.057244</b> | <b>-1925.437235</b> | <b>-0.0104264</b>     | <b>-6.542566</b>        | <b>-1925.539224</b> | <b>0.029848</b>  | <b>18.72962</b>    |
| <b>D+LYS-(H)</b>          | <b>0.623385</b> | <b>-1926.06719</b>  | <b>-1925.443805</b> | <b>-0.0169962</b>     | <b>-10.6651155</b>      | <b>-1925.546487</b> | <b>0.022585</b>  | <b>14.1720875</b>  |
| <b>1a+2a+LYS +GLU +2a</b> | <b>0.75184</b>  | <b>-2289.894105</b> | <b>-2289.142265</b> | <b>0</b>              | <b>0</b>                | <b>-2289.314858</b> | <b>0</b>         | <b>0</b>           |
| <b>E+LYS-(H)</b>          | <b>0.754129</b> | <b>-2289.928485</b> | <b>-2289.174356</b> | <b>-0.0320912</b>     | <b>-20.137228</b>       | <b>-2289.288163</b> | <b>0.026695</b>  | <b>16.7511125</b>  |
| <b>F+LYS-(H)+H2O +GLU</b> | <b>0.748214</b> | <b>-2289.917941</b> | <b>-2289.169727</b> | <b>-0.0274615</b>     | <b>-17.23209125</b>     | <b>-2289.320728</b> | <b>-0.00587</b>  | <b>-3.683425</b>   |

|                             |          |              |              |            |              |              |          |           |
|-----------------------------|----------|--------------|--------------|------------|--------------|--------------|----------|-----------|
| 1a+2a+LYS +GLU<br>+2a - H2O | 0.730552 | -2213.460056 | -2212.729504 | 0          | 0            | -2212.884449 | 0        | 0         |
| TS3 +LYS-H+GLU              | 0.728    | -2213.471553 | -2212.743553 | -0.0140484 | -8.815371    | -2212.871632 | 0.012817 | 8.0426675 |
| G + LYS-H + GLU             | 0.729284 | -2213.479962 | -2212.750678 | -0.0211733 | -13.28624575 | -2212.879106 | 0.005343 | 3.3527325 |
| 1a + 2*2a                   | 0.374356 | -1240.78509  | -1240.410734 | 0          | 0            | -1240.504441 | 0        | 0         |
| 3a + H2O                    | 0.374856 | -1240.803225 | -1240.428369 | -0.0176351 | -11.06602525 | -1240.49612  | 0.008321 | 5.2214275 |

Table S1: All-point atom balance

## Optimized Cartesian Coordinates and electronic energies

2a

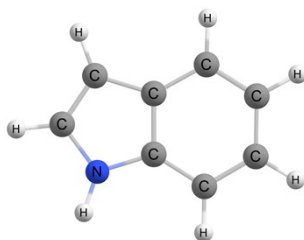

Zero-point correction= 0.129619 (Hartree/Particle)  
 Thermal correction to Energy= 0.135937  
 Thermal correction to Enthalpy= 0.136882  
 Thermal correction to Gibbs Free Energy= 0.099290  
 Sum of electronic and zero-point Energies= -363.715457  
 Sum of electronic and thermal Energies= -363.709139  
 Sum of electronic and thermal Enthalpies= -363.708194  
 Sum of electronic and thermal Free Energies= -363.745786

C 0.249870000 0.751732000 0.000060000  
 C 0.248458000 -0.672330000 0.000123000  
 C -0.935389000 -1.420319000 0.000319000  
 C -2.137728000 -0.719888000 -0.000375000  
 C -2.161649000 0.692424000 -0.000054000  
 C -0.983634000 1.430471000 0.000125000

|   |              |              |              |
|---|--------------|--------------|--------------|
| C | 1.626518000  | 1.168480000  | -0.000090000 |
| H | -0.919568000 | -2.506855000 | 0.000287000  |
| H | -3.074568000 | -1.269242000 | -0.000752000 |
| H | -3.118430000 | 1.206340000  | 0.000364000  |
| H | -1.012642000 | 2.516651000  | 0.000523000  |
| H | 2.000266000  | 2.182686000  | -0.000054000 |
| N | 1.568429000  | -1.081736000 | -0.000096000 |
| H | 1.883688000  | -2.038384000 | 0.000738000  |
| C | 2.392707000  | 0.030273000  | -0.000117000 |
| H | 3.467333000  | -0.084102000 | -0.000376000 |

**1a**

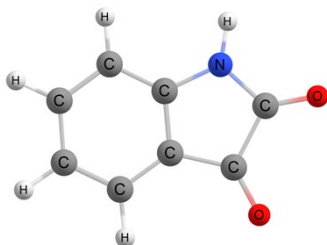

|                                              |                             |
|----------------------------------------------|-----------------------------|
| Zero-point correction=                       | 0.115118 (Hartree/Particle) |
| Thermal correction to Energy=                | 0.123147                    |
| Thermal correction to Enthalpy=              | 0.124091                    |
| Thermal correction to Gibbs Free Energy=     | 0.082069                    |
| Sum of electronic and zero-point Energies=   | -512.979820                 |
| Sum of electronic and thermal Energies=      | -512.971791                 |
| Sum of electronic and thermal Enthalpies=    | -512.970847                 |
| Sum of electronic and thermal Free Energies= | -513.012869                 |

|   |             |              |              |
|---|-------------|--------------|--------------|
| C | 0.254974000 | 0.580713000  | -0.000066000 |
| C | 0.381456000 | -0.823594000 | 0.000162000  |
| C | 1.630779000 | -1.432441000 | 0.000052000  |
| C | 2.757848000 | -0.597363000 | -0.000100000 |
| C | 2.645567000 | 0.800154000  | 0.000138000  |
| C | 1.382593000 | 1.399713000  | 0.000311000  |

|   |              |              |              |
|---|--------------|--------------|--------------|
| C | -1.181163000 | 0.902592000  | -0.000110000 |
| H | 1.737352000  | -2.512740000 | 0.000212000  |
| H | 3.744611000  | -1.051209000 | 0.000325000  |
| H | 3.540860000  | 1.412978000  | -0.000223000 |
| H | 1.266528000  | 2.479222000  | 0.000430000  |
| N | -0.886357000 | -1.427483000 | -0.000460000 |
| H | -1.056067000 | -2.423480000 | 0.000202000  |
| C | -1.909121000 | -0.493726000 | -0.000921000 |
| O | -3.100041000 | -0.713409000 | 0.000889000  |

A

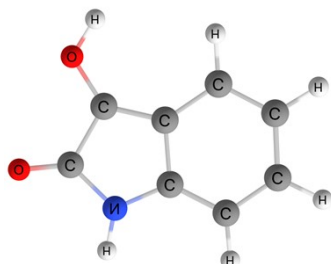

|                                              |                             |
|----------------------------------------------|-----------------------------|
| Zero-point correction=                       | 0.127589 (Hartree/Particle) |
| Thermal correction to Energy=                | 0.135852                    |
| Thermal correction to Enthalpy=              | 0.136796                    |
| Thermal correction to Gibbs Free Energy=     | 0.094436                    |
| Sum of electronic and zero-point Energies=   | -513.293806                 |
| Sum of electronic and thermal Energies=      | -513.285543                 |
| Sum of electronic and thermal Enthalpies=    | -513.284599                 |
| Sum of electronic and thermal Free Energies= | -513.326960                 |

|   |              |              |              |
|---|--------------|--------------|--------------|
| C | 0.241754000  | 0.563634000  | 0.000575000  |
| C | 0.413520000  | -0.871483000 | 0.000352000  |
| C | 1.687175000  | -1.429630000 | -0.000157000 |
| C | 2.772137000  | -0.551541000 | -0.000556000 |
| C | 2.628206000  | 0.863358000  | -0.000314000 |
| C | 1.374932000  | 1.429241000  | 0.000391000  |
| C | -1.128763000 | 0.786757000  | 0.000101000  |
| H | 1.837691000  | -2.503551000 | -0.000148000 |
| H | 3.774931000  | -0.969035000 | -0.001052000 |

|   |              |              |              |
|---|--------------|--------------|--------------|
| H | 3.514199000  | 1.487761000  | -0.000559000 |
| H | 1.254040000  | 2.508382000  | 0.000811000  |
| N | -0.808943000 | -1.508107000 | 0.001257000  |
| H | -0.962763000 | -2.508953000 | -0.002037000 |
| C | -1.848366000 | -0.580912000 | -0.000009000 |
| O | -3.032582000 | -0.772242000 | -0.000736000 |
| O | -1.870239000 | 1.847035000  | -0.000217000 |
| H | -1.376502000 | 2.687254000  | -0.000487000 |

### Lys

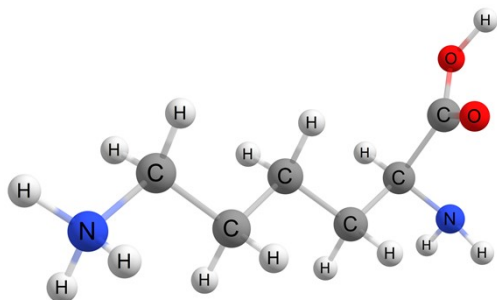

|                                              |                             |
|----------------------------------------------|-----------------------------|
| Zero-point correction=                       | 0.225848 (Hartree/Particle) |
| Thermal correction to Energy=                | 0.238274                    |
| Thermal correction to Enthalpy=              | 0.239218                    |
| Thermal correction to Gibbs Free Energy=     | 0.185821                    |
| Sum of electronic and zero-point Energies=   | -497.212041                 |
| Sum of electronic and thermal Energies=      | -497.199616                 |
| Sum of electronic and thermal Enthalpies=    | -497.198672                 |
| Sum of electronic and thermal Free Energies= | -497.252069                 |

|   |              |              |              |
|---|--------------|--------------|--------------|
| N | 2.840787000  | 1.552815000  | -0.157005000 |
| H | 2.759569000  | 1.723951000  | -1.155030000 |
| C | 1.788051000  | 0.672924000  | 0.344334000  |
| H | 1.856340000  | 0.678192000  | 1.437538000  |
| C | 0.361575000  | 1.049120000  | -0.104644000 |
| C | 2.149330000  | -0.739126000 | -0.132368000 |
| H | 0.179526000  | 2.089381000  | 0.192675000  |
| H | 0.331941000  | 1.008923000  | -1.200227000 |
| C | -0.736809000 | 0.139337000  | 0.468244000  |

|   |              |              |              |
|---|--------------|--------------|--------------|
| O | 1.751334000  | -1.232117000 | -1.170243000 |
| H | -0.497923000 | -0.905089000 | 0.236433000  |
| H | -0.768983000 | 0.232121000  | 1.561933000  |
| C | -2.121776000 | 0.469352000  | -0.118437000 |
| H | -2.394513000 | 1.504604000  | 0.128256000  |
| H | -2.069615000 | 0.394076000  | -1.213205000 |
| C | -3.184212000 | -0.486711000 | 0.408799000  |
| H | -2.960703000 | -1.528231000 | 0.166083000  |
| H | -3.333651000 | -0.397526000 | 1.487394000  |
| N | -4.546356000 | -0.192680000 | -0.229695000 |
| H | -4.499628000 | -0.290464000 | -1.250117000 |
| H | -5.276964000 | -0.826700000 | 0.111788000  |
| H | -4.846950000 | 0.767688000  | -0.029738000 |
| H | 2.873296000  | 2.438806000  | 0.335289000  |
| O | 2.975280000  | -1.370670000 | 0.718453000  |
| H | 3.237378000  | -2.217752000 | 0.316582000  |

### Glu

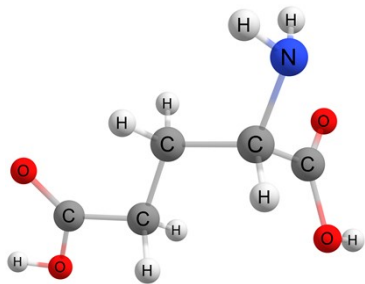

|                                              |                             |             |              |
|----------------------------------------------|-----------------------------|-------------|--------------|
| Zero-point correction=                       | 0.151636 (Hartree/Particle) |             |              |
| Thermal correction to Energy=                | 0.162581                    |             |              |
| Thermal correction to Enthalpy=              | 0.163526                    |             |              |
| Thermal correction to Gibbs Free Energy=     | 0.112778                    |             |              |
| Sum of electronic and zero-point Energies=   | -551.519490                 |             |              |
| Sum of electronic and thermal Energies=      | -551.508544                 |             |              |
| Sum of electronic and thermal Enthalpies=    | -551.507600                 |             |              |
| Sum of electronic and thermal Free Energies= | -551.558348                 |             |              |
| N                                            | -2.235826000                | 1.750222000 | -0.316234000 |
| H                                            | -2.454894000                | 1.843824000 | 0.672957000  |



|   |              |              |              |
|---|--------------|--------------|--------------|
| C | -1.338557000 | 0.616441000  | -0.530126000 |
| H | -1.285768000 | 0.413413000  | -1.605564000 |
| C | 0.099276000  | 0.826529000  | 0.012267000  |
| C | -1.978608000 | -0.591441000 | 0.142317000  |
| H | 0.487775000  | 1.747864000  | -0.434793000 |
| H | 0.047971000  | 1.001472000  | 1.093067000  |
| C | 1.066989000  | -0.320762000 | -0.292137000 |
| O | -2.486357000 | -0.575265000 | 1.243554000  |
| H | 0.798362000  | -1.243013000 | 0.234032000  |
| H | 1.049275000  | -0.578490000 | -1.360039000 |
| C | 2.500280000  | 0.014797000  | 0.056647000  |
| O | 2.927546000  | 1.110140000  | 0.354866000  |
| H | -1.806708000 | 2.614647000  | -0.633629000 |
| O | -1.889000000 | -1.716578000 | -0.605604000 |
| H | -2.296955000 | -2.437373000 | -0.094165000 |
| O | 3.299377000  | -1.080286000 | -0.016539000 |
| H | 4.202914000  | -0.791373000 | 0.197741000  |

**water**

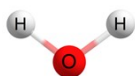

|                                              |                             |
|----------------------------------------------|-----------------------------|
| Zero-point correction=                       | 0.021288 (Hartree/Particle) |
| Thermal correction to Energy=                | 0.024124                    |
| Thermal correction to Enthalpy=              | 0.025068                    |
| Thermal correction to Gibbs Free Energy=     | 0.003640                    |
| Sum of electronic and zero-point Energies=   | -76.412761                  |
| Sum of electronic and thermal Energies=      | -76.409925                  |
| Sum of electronic and thermal Enthalpies=    | -76.408981                  |
| Sum of electronic and thermal Free Energies= | -76.430409                  |

|   |             |              |              |
|---|-------------|--------------|--------------|
| O | 0.000000000 | 0.000000000  | 0.116490000  |
| H | 0.000000000 | 0.769490000  | -0.465961000 |
| H | 0.000000000 | -0.769490000 | -0.465961000 |

### Lys-1a complex

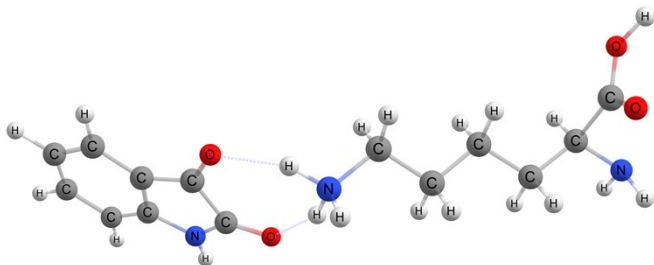

Zero-point correction= 0.342595 (Hartree/Particle)  
 Thermal correction to Energy= 0.364569  
 Thermal correction to Enthalpy= 0.365513  
 Thermal correction to Gibbs Free Energy= 0.285866  
 Sum of electronic and zero-point Energies= -1010.241705  
 Sum of electronic and thermal Energies= -1010.219731  
 Sum of electronic and thermal Enthalpies= -1010.218787  
 Sum of electronic and thermal Free Energies= -1010.298434

|   |              |              |              |
|---|--------------|--------------|--------------|
| C | -4.786523000 | -0.530057000 | 0.071657000  |
| C | -5.185008000 | 0.812518000  | 0.255623000  |
| C | -6.476667000 | 1.140866000  | 0.623267000  |
| C | -7.379449000 | 0.077998000  | 0.806763000  |
| C | -7.002555000 | -1.260935000 | 0.628800000  |
| C | -5.695214000 | -1.577811000 | 0.257491000  |
| C | -3.386809000 | -0.521874000 | -0.307316000 |
| H | -6.791132000 | 2.169328000  | 0.766414000  |
| H | -8.400586000 | 0.307040000  | 1.095526000  |
| H | -7.731554000 | -2.049139000 | 0.780748000  |
| H | -5.380422000 | -2.606379000 | 0.113563000  |
| N | -4.092957000 | 1.683891000  | 0.009609000  |
| H | -4.128913000 | 2.693607000  | 0.073676000  |
| C | -2.975536000 | 0.995609000  | -0.333244000 |
| O | -1.866792000 | 1.444276000  | -0.608798000 |
| O | -2.605896000 | -1.428060000 | -0.570497000 |
| N | 7.079492000  | 1.643779000  | 0.370709000  |
| H | 7.272288000  | 1.720019000  | -0.624367000 |

|   |              |              |              |
|---|--------------|--------------|--------------|
| C | 5.988882000  | 0.706530000  | 0.641033000  |
| H | 5.773497000  | 0.759126000  | 1.713253000  |
| C | 4.701936000  | 0.951317000  | -0.172277000 |
| C | 6.556957000  | -0.684271000 | 0.346421000  |
| H | 4.382970000  | 1.985376000  | 0.011463000  |
| H | 4.952759000  | 0.870118000  | -1.237041000 |
| C | 3.555205000  | -0.015079000 | 0.160710000  |
| O | 6.629012000  | -1.167887000 | -0.765507000 |
| H | 3.893571000  | -1.047617000 | 0.007994000  |
| H | 3.284967000  | 0.079059000  | 1.221345000  |
| C | 2.312213000  | 0.233852000  | -0.708815000 |
| H | 1.941068000  | 1.254529000  | -0.546627000 |
| H | 2.595167000  | 0.157696000  | -1.767964000 |
| C | 1.202173000  | -0.768769000 | -0.407575000 |
| H | 1.528879000  | -1.797325000 | -0.580851000 |
| H | 0.848476000  | -0.688895000 | 0.623366000  |
| N | -0.002371000 | -0.536165000 | -1.287390000 |
| H | 0.244543000  | -0.597981000 | -2.278175000 |
| H | -0.779184000 | -1.194475000 | -1.093994000 |
| H | -0.452460000 | 0.386266000  | -1.111714000 |
| H | 6.886180000  | 2.567948000  | 0.742672000  |
| O | 6.991292000  | -1.313426000 | 1.455306000  |
| H | 7.412179000  | -2.147419000 | 1.180942000  |

IM1

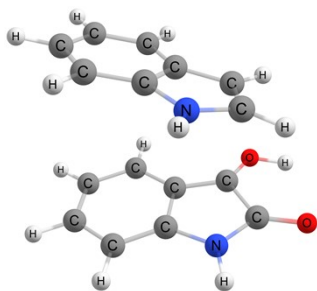

|                                              |                             |
|----------------------------------------------|-----------------------------|
| Zero-point correction=                       | 0.258498 (Hartree/Particle) |
| Thermal correction to Energy=                | 0.274934                    |
| Thermal correction to Enthalpy=              | 0.275879                    |
| Thermal correction to Gibbs Free Energy=     | 0.212694                    |
| Sum of electronic and zero-point Energies=   | -877.035774                 |
| Sum of electronic and thermal Energies=      | -877.019338                 |
| Sum of electronic and thermal Enthalpies=    | -877.018394                 |
| Sum of electronic and thermal Free Energies= | -877.081578                 |

|   |              |              |              |
|---|--------------|--------------|--------------|
| C | 1.024503000  | 0.973472000  | 0.671171000  |
| C | 1.319602000  | 1.292924000  | -0.697885000 |
| C | 0.669148000  | 2.332847000  | -1.338191000 |
| C | -0.287487000 | 3.047262000  | -0.599056000 |
| C | -0.590700000 | 2.749287000  | 0.745627000  |
| C | 0.058462000  | 1.712512000  | 1.394756000  |
| C | 1.859343000  | -0.094182000 | 1.004937000  |
| H | 0.889354000  | 2.599175000  | -2.366428000 |
| H | -0.805430000 | 3.870240000  | -1.082340000 |
| H | -1.334343000 | 3.339871000  | 1.268333000  |
| H | -0.149447000 | 1.472488000  | 2.431310000  |
| N | 2.313073000  | 0.440209000  | -1.187289000 |
| H | 2.771877000  | 0.519057000  | -2.085115000 |
| C | 2.728038000  | -0.428122000 | -0.197199000 |
| O | 3.616016000  | -1.256055000 | -0.196622000 |
| O | 2.085898000  | -0.638012000 | 2.167354000  |
| H | 2.807609000  | -1.296970000 | 2.087610000  |
| C | -1.342284000 | -1.403724000 | 0.403505000  |
| C | -1.666163000 | -1.021479000 | -0.926812000 |

|   |              |              |              |
|---|--------------|--------------|--------------|
| C | -2.795814000 | -0.267095000 | -1.237846000 |
| C | -3.623877000 | 0.108521000  | -0.175323000 |
| C | -3.326047000 | -0.254941000 | 1.151591000  |
| C | -2.190569000 | -1.004321000 | 1.454643000  |
| C | -0.130869000 | -2.167556000 | 0.335325000  |
| H | -3.039812000 | 0.005652000  | -2.260094000 |
| H | -4.522245000 | 0.681459000  | -0.381795000 |
| H | -4.000992000 | 0.042661000  | 1.947597000  |
| H | -1.980041000 | -1.300749000 | 2.478038000  |
| H | 0.359544000  | -2.688487000 | 1.145089000  |
| N | -0.676659000 | -1.547826000 | -1.756284000 |
| H | -0.683259000 | -1.511805000 | -2.765555000 |
| C | 0.224041000  | -2.249267000 | -1.006901000 |
| H | 1.041009000  | -2.783563000 | -1.471552000 |

### TS1

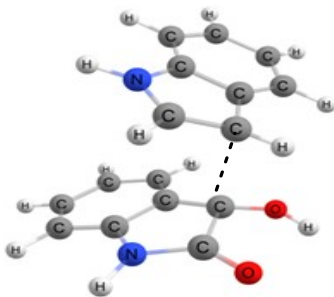

|                                              |                             |
|----------------------------------------------|-----------------------------|
| Zero-point correction=                       | 0.259213 (Hartree/Particle) |
| Thermal correction to Energy=                | 0.274420                    |
| Thermal correction to Enthalpy=              | 0.275364                    |
| Thermal correction to Gibbs Free Energy=     | 0.215984                    |
| Sum of electronic and zero-point Energies=   | -877.031807                 |
| Sum of electronic and thermal Energies=      | -877.016600                 |
| Sum of electronic and thermal Enthalpies=    | -877.015656                 |
| Sum of electronic and thermal Free Energies= | -877.075036                 |

|   |              |             |              |
|---|--------------|-------------|--------------|
| C | -1.125517000 | 0.465088000 | -0.671815000 |
| C | -2.232001000 | 0.686193000 | 0.188471000  |
| C | -2.664609000 | 1.968082000 | 0.490471000  |
| C | -1.970396000 | 3.038184000 | -0.095957000 |

|   |              |              |              |
|---|--------------|--------------|--------------|
| C | -0.881456000 | 2.835143000  | -0.957412000 |
| C | -0.447924000 | 1.542791000  | -1.254084000 |
| C | -0.982959000 | -0.963726000 | -0.796026000 |
| H | -3.520509000 | 2.144897000  | 1.133617000  |
| H | -2.297782000 | 4.051342000  | 0.115825000  |
| H | -0.381447000 | 3.688973000  | -1.401237000 |
| H | 0.387710000  | 1.369858000  | -1.923672000 |
| N | -2.777114000 | -0.546518000 | 0.600730000  |
| H | -3.650935000 | -0.659811000 | 1.098841000  |
| C | -2.152318000 | -1.593505000 | -0.037803000 |
| O | -2.430558000 | -2.775838000 | -0.055893000 |
| O | -0.531586000 | -1.566403000 | -1.884643000 |
| H | -0.825617000 | -2.499515000 | -1.885145000 |
| C | 1.757440000  | -0.910812000 | 0.164655000  |
| C | 1.967928000  | 0.154646000  | 1.067431000  |
| C | 2.997067000  | 1.082203000  | 0.930660000  |
| C | 3.844387000  | 0.916933000  | -0.167060000 |
| C | 3.658259000  | -0.135592000 | -1.081401000 |
| C | 2.618687000  | -1.055922000 | -0.929706000 |
| C | 0.580765000  | -1.636314000 | 0.628436000  |
| H | 3.145773000  | 1.888692000  | 1.641646000  |
| H | 4.667866000  | 1.608669000  | -0.310694000 |
| H | 4.344522000  | -0.239408000 | -1.915517000 |
| H | 2.494165000  | -1.870119000 | -1.635614000 |
| H | 0.346818000  | -2.669673000 | 0.406329000  |
| N | 0.991761000  | 0.037619000  | 2.074951000  |
| H | 0.904036000  | 0.660300000  | 2.868771000  |
| C | 0.222031000  | -1.035903000 | 1.861836000  |
| H | -0.556278000 | -1.318919000 | 2.557183000  |

**B**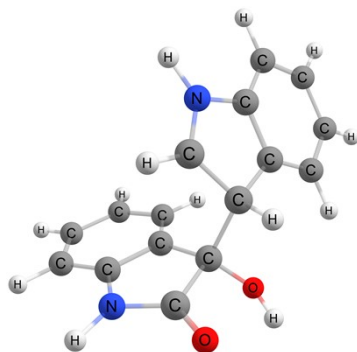

|                                              |                             |
|----------------------------------------------|-----------------------------|
| Zero-point correction=                       | 0.260832 (Hartree/Particle) |
| Thermal correction to Energy=                | 0.276049                    |
| Thermal correction to Enthalpy=              | 0.276993                    |
| Thermal correction to Gibbs Free Energy=     | 0.217946                    |
| Sum of electronic and zero-point Energies=   | -877.043854                 |
| Sum of electronic and thermal Energies=      | -877.028638                 |
| Sum of electronic and thermal Enthalpies=    | -877.027693                 |
| Sum of electronic and thermal Free Energies= | -877.086740                 |

|   |              |              |              |
|---|--------------|--------------|--------------|
| C | -1.268461000 | 0.451361000  | -0.438225000 |
| C | -2.546452000 | 0.405083000  | 0.144868000  |
| C | -3.298843000 | 1.551339000  | 0.363233000  |
| C | -2.740050000 | 2.774401000  | -0.034449000 |
| C | -1.476517000 | 2.837429000  | -0.630201000 |
| C | -0.729872000 | 1.668861000  | -0.839594000 |
| C | -0.742265000 | -0.962053000 | -0.538155000 |
| H | -4.287422000 | 1.507528000  | 0.809004000  |
| H | -3.308706000 | 3.686793000  | 0.114455000  |
| H | -1.076901000 | 3.795357000  | -0.945734000 |
| H | 0.237879000  | 1.715003000  | -1.328349000 |
| N | -2.892317000 | -0.936173000 | 0.436156000  |
| H | -3.805024000 | -1.247386000 | 0.745309000  |
| C | -1.925765000 | -1.808744000 | 0.024558000  |
| O | -1.927590000 | -3.026845000 | 0.057976000  |
| O | -0.459141000 | -1.348761000 | -1.859598000 |
| H | -0.645170000 | -2.299332000 | -1.954647000 |
| C | 1.815531000  | -0.569646000 | -0.068674000 |

|   |              |              |              |
|---|--------------|--------------|--------------|
| C | 2.300609000  | 0.168922000  | 1.021258000  |
| C | 3.470151000  | 0.919516000  | 1.003258000  |
| C | 4.181193000  | 0.913906000  | -0.199515000 |
| C | 3.721721000  | 0.184739000  | -1.307371000 |
| C | 2.539095000  | -0.565933000 | -1.257670000 |
| C | 0.536794000  | -1.254334000 | 0.354504000  |
| H | 3.818956000  | 1.476166000  | 1.867048000  |
| H | 5.103384000  | 1.480049000  | -0.275085000 |
| H | 4.298906000  | 0.200854000  | -2.226174000 |
| H | 2.193114000  | -1.119440000 | -2.122291000 |
| H | 0.626959000  | -2.354273000 | 0.357577000  |
| N | 1.385165000  | -0.018908000 | 2.092808000  |
| H | 1.491844000  | 0.409629000  | 3.009677000  |
| C | 0.394314000  | -0.800076000 | 1.766852000  |
| H | -0.391006000 | -1.049157000 | 2.471372000  |

C

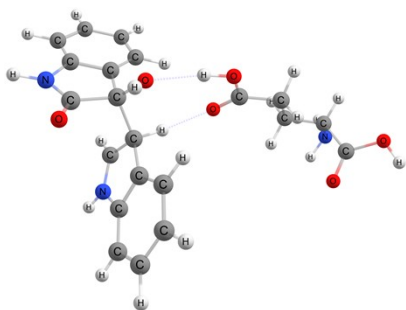

|                                              |                             |
|----------------------------------------------|-----------------------------|
| Zero-point correction=                       | 0.413474 (Hartree/Particle) |
| Thermal correction to Energy=                | 0.441578                    |
| Thermal correction to Enthalpy=              | 0.442522                    |
| Thermal correction to Gibbs Free Energy=     | 0.348728                    |
| Sum of electronic and zero-point Energies=   | -1428.577629                |
| Sum of electronic and thermal Energies=      | -1428.549526                |
| Sum of electronic and thermal Enthalpies=    | -1428.548582                |
| Sum of electronic and thermal Free Energies= | -1428.642376                |

|   |             |              |             |
|---|-------------|--------------|-------------|
| N | 6.195893000 | -1.461981000 | 1.721503000 |
| H | 5.825740000 | -0.849127000 | 2.443004000 |
| C | 5.537133000 | -1.235533000 | 0.433490000 |



|   |              |              |              |
|---|--------------|--------------|--------------|
| H | 5.895715000  | -2.008473000 | -0.253952000 |
| C | 3.997164000  | -1.235926000 | 0.486148000  |
| C | 6.062914000  | 0.112454000  | -0.067192000 |
| H | 3.672430000  | -2.182727000 | 0.932004000  |
| H | 3.671145000  | -0.434566000 | 1.156691000  |
| C | 3.341402000  | -1.055813000 | -0.885808000 |
| O | 5.628190000  | 1.189112000  | 0.291658000  |
| H | 3.694879000  | -0.139352000 | -1.376784000 |
| H | 3.594724000  | -1.873147000 | -1.572762000 |
| C | 1.837483000  | -0.952273000 | -0.835529000 |
| O | 1.164959000  | -0.932473000 | 0.191058000  |
| H | 6.102568000  | -2.425253000 | 2.027099000  |
| O | 7.080290000  | -0.018919000 | -0.939191000 |
| H | 7.409643000  | 0.871918000  | -1.152961000 |
| O | 1.287971000  | -0.866043000 | -2.054069000 |
| H | 0.312889000  | -0.778200000 | -1.971690000 |
| C | -2.613615000 | -1.657632000 | -0.120981000 |
| C | -4.011728000 | -1.778306000 | -0.064392000 |
| C | -4.633001000 | -2.933583000 | 0.390424000  |
| C | -3.806339000 | -3.993007000 | 0.792664000  |
| C | -2.412712000 | -3.886564000 | 0.748193000  |
| C | -1.802083000 | -2.708263000 | 0.294409000  |
| C | -2.273912000 | -0.279143000 | -0.638003000 |
| H | -5.713992000 | -3.023280000 | 0.426778000  |
| H | -4.262772000 | -4.912859000 | 1.144264000  |
| H | -1.798196000 | -4.722836000 | 1.064154000  |
| H | -0.720657000 | -2.618329000 | 0.264327000  |
| N | -4.612476000 | -0.580704000 | -0.519214000 |
| H | -5.599126000 | -0.465035000 | -0.714818000 |
| C | -3.680509000 | 0.315394000  | -0.963330000 |
| O | -3.859010000 | 1.367619000  | -1.550288000 |
| C | -1.200932000 | 2.036340000  | 0.147225000  |

|   |              |              |              |
|---|--------------|--------------|--------------|
| C | -1.646090000 | 2.795712000  | 1.240188000  |
| C | -1.507209000 | 4.174624000  | 1.350473000  |
| C | -0.875207000 | 4.813624000  | 0.282627000  |
| C | -0.402501000 | 4.081248000  | -0.817548000 |
| C | -0.549742000 | 2.691364000  | -0.894618000 |
| C | -1.496909000 | 0.581831000  | 0.434358000  |
| H | -1.860784000 | 4.727300000  | 2.214892000  |
| H | -0.739446000 | 5.889393000  | 0.309353000  |
| H | 0.095490000  | 4.605752000  | -1.626413000 |
| H | -0.155357000 | 2.147821000  | -1.745270000 |
| H | -0.543277000 | 0.018306000  | 0.557602000  |
| N | -2.217178000 | 1.889316000  | 2.172301000  |
| H | -2.611080000 | 2.171855000  | 3.066557000  |
| C | -2.160107000 | 0.651988000  | 1.759247000  |
| H | -2.551800000 | -0.168873000 | 2.347963000  |
| O | -1.509671000 | -0.289647000 | -1.836199000 |
| H | -1.845247000 | 0.414894000  | -2.418185000 |

## TS2

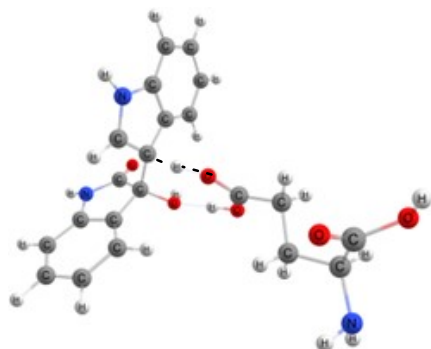

|                                              |                             |
|----------------------------------------------|-----------------------------|
| Zero-point correction=                       | 0.409055 (Hartree/Particle) |
| Thermal correction to Energy=                | 0.436278                    |
| Thermal correction to Enthalpy=              | 0.437223                    |
| Thermal correction to Gibbs Free Energy=     | 0.346658                    |
| Sum of electronic and zero-point Energies=   | -1428.572609                |
| Sum of electronic and thermal Energies=      | -1428.545386                |
| Sum of electronic and thermal Enthalpies=    | -1428.544441                |
| Sum of electronic and thermal Free Energies= | -1428.635006                |

|   |              |              |              |
|---|--------------|--------------|--------------|
| N | 6.240625000  | -1.718450000 | -0.824406000 |
| H | 5.931103000  | -2.448521000 | -0.189306000 |
| C | 5.469339000  | -0.489163000 | -0.674264000 |
| H | 5.808513000  | 0.207806000  | -1.447389000 |
| C | 3.939862000  | -0.679000000 | -0.766562000 |
| C | 5.859882000  | 0.087939000  | 0.689794000  |
| H | 3.713652000  | -1.170221000 | -1.718495000 |
| H | 3.626580000  | -1.342191000 | 0.047219000  |
| C | 3.161803000  | 0.659905000  | -0.674317000 |
| O | 5.373245000  | -0.276103000 | 1.741392000  |
| H | 3.372626000  | 1.161904000  | 0.271861000  |
| H | 3.448479000  | 1.312140000  | -1.506565000 |
| C | 1.685823000  | 0.428761000  | -0.750984000 |
| O | 0.972652000  | 0.474015000  | 0.285862000  |
| H | 6.230448000  | -2.068566000 | -1.776469000 |
| O | 6.816846000  | 1.027793000  | 0.597963000  |
| H | 7.072993000  | 1.289590000  | 1.500238000  |
| O | 1.212074000  | 0.146905000  | -1.932789000 |
| H | 0.230168000  | -0.073043000 | -1.923926000 |
| C | -2.008291000 | -1.977262000 | -0.035354000 |
| C | -3.313289000 | -2.479697000 | 0.097152000  |
| C | -3.571261000 | -3.713481000 | 0.680189000  |
| C | -2.471730000 | -4.457913000 | 1.130356000  |
| C | -1.165545000 | -3.974686000 | 1.004398000  |
| C | -0.926832000 | -2.720209000 | 0.424584000  |
| C | -2.089328000 | -0.597492000 | -0.651481000 |
| H | -4.582072000 | -4.096300000 | 0.777616000  |
| H | -2.642302000 | -5.429918000 | 1.582110000  |
| H | -0.332115000 | -4.574041000 | 1.355023000  |
| H | 0.089168000  | -2.348565000 | 0.331205000  |
| N | -4.237961000 | -1.558562000 | -0.444852000 |
| H | -5.213418000 | -1.759824000 | -0.626269000 |

|   |              |              |              |
|---|--------------|--------------|--------------|
| C | -3.600494000 | -0.507776000 | -1.041469000 |
| O | -4.054787000 | 0.327554000  | -1.801704000 |
| C | -1.859888000 | 1.976856000  | 0.082073000  |
| C | -1.916732000 | 2.591572000  | 1.351056000  |
| C | -2.007926000 | 3.970950000  | 1.539503000  |
| C | -2.056496000 | 4.755109000  | 0.390904000  |
| C | -2.010936000 | 4.169849000  | -0.889008000 |
| C | -1.904904000 | 2.790894000  | -1.057842000 |
| C | -1.676143000 | 0.521244000  | 0.316856000  |
| H | -2.043198000 | 4.413024000  | 2.530134000  |
| H | -2.135800000 | 5.833156000  | 0.483241000  |
| H | -2.066001000 | 4.808511000  | -1.764564000 |
| H | -1.887355000 | 2.368326000  | -2.055066000 |
| H | -0.302962000 | 0.444174000  | 0.280972000  |
| N | -1.870764000 | 1.570273000  | 2.312682000  |
| H | -1.855369000 | 1.722921000  | 3.314019000  |
| C | -1.786213000 | 0.372848000  | 1.733138000  |
| H | -1.743856000 | -0.536556000 | 2.317126000  |
| O | -1.347214000 | -0.463457000 | -1.883359000 |
| H | -1.929312000 | -0.035777000 | -2.537925000 |

## D

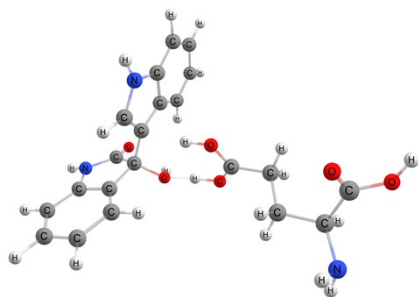

|                                            |                             |
|--------------------------------------------|-----------------------------|
| Zero-point correction=                     | 0.412431 (Hartree/Particle) |
| Thermal correction to Energy=              | 0.440041                    |
| Thermal correction to Enthalpy=            | 0.440986                    |
| Thermal correction to Gibbs Free Energy=   | 0.349341                    |
| Sum of electronic and zero-point Energies= | -1428.579179                |
| Sum of electronic and thermal Energies=    | -1428.551568                |
| Sum of electronic and thermal Enthalpies=  | -1428.550624                |

Sum of electronic and thermal Free Energies= -1428.642269

|   |              |              |              |
|---|--------------|--------------|--------------|
| N | 6.040029000  | -2.379055000 | -0.493700000 |
| H | 5.715153000  | -2.880231000 | 0.327615000  |
| C | 5.420907000  | -1.069500000 | -0.641412000 |
| H | 5.752102000  | -0.656288000 | -1.599814000 |
| C | 3.877140000  | -1.090247000 | -0.577199000 |
| C | 5.995261000  | -0.190781000 | 0.476299000  |
| H | 3.512354000  | -1.778986000 | -1.346073000 |
| H | 3.577131000  | -1.470549000 | 0.404717000  |
| C | 3.253050000  | 0.318915000  | -0.798990000 |
| O | 5.506237000  | -0.103545000 | 1.585030000  |
| H | 3.601426000  | 1.007738000  | -0.026735000 |
| H | 3.524086000  | 0.695913000  | -1.789640000 |
| C | 1.771171000  | 0.244746000  | -0.725500000 |
| O | 1.220851000  | 0.510067000  | 0.417455000  |
| H | 5.937496000  | -2.960812000 | -1.317803000 |
| O | 7.109620000  | 0.453859000  | 0.097391000  |
| H | 7.469415000  | 0.925544000  | 0.869644000  |
| O | 1.112071000  | -0.112152000 | -1.753943000 |
| H | 0.056058000  | -0.226337000 | -1.684926000 |
| C | -2.433184000 | -1.801983000 | 0.033248000  |
| C | -3.804893000 | -2.103746000 | 0.009919000  |
| C | -4.311297000 | -3.269024000 | 0.570016000  |
| C | -3.396546000 | -4.156390000 | 1.154040000  |
| C | -2.026334000 | -3.878146000 | 1.176698000  |
| C | -1.537224000 | -2.687575000 | 0.620183000  |
| C | -2.237089000 | -0.439281000 | -0.589954000 |
| H | -5.372639000 | -3.494463000 | 0.550529000  |
| H | -3.763064000 | -5.079471000 | 1.591655000  |
| H | -1.338895000 | -4.587049000 | 1.625762000  |
| H | -0.471513000 | -2.477050000 | 0.640997000  |

|   |              |              |              |
|---|--------------|--------------|--------------|
| N | -4.509295000 | -1.078270000 | -0.659923000 |
| H | -5.473656000 | -1.143183000 | -0.960745000 |
| C | -3.651805000 | -0.163409000 | -1.197452000 |
| O | -3.865956000 | 0.677518000  | -2.052691000 |
| C | -1.652673000 | 2.062474000  | 0.128187000  |
| C | -1.415039000 | 2.672602000  | 1.388467000  |
| C | -1.177493000 | 4.043795000  | 1.536969000  |
| C | -1.191846000 | 4.818001000  | 0.383721000  |
| C | -1.440042000 | 4.240348000  | -0.880288000 |
| C | -1.668882000 | 2.877493000  | -1.022374000 |
| C | -1.816483000 | 0.635015000  | 0.384188000  |
| H | -0.997116000 | 4.485647000  | 2.512019000  |
| H | -1.019652000 | 5.886927000  | 0.456652000  |
| H | -1.465664000 | 4.878435000  | -1.757768000 |
| H | -1.899521000 | 2.465301000  | -1.997735000 |
| H | 0.220716000  | 0.470245000  | 0.432974000  |
| N | -1.469950000 | 1.675323000  | 2.352175000  |
| H | -1.332062000 | 1.813650000  | 3.343105000  |
| C | -1.717533000 | 0.470378000  | 1.763350000  |
| H | -1.826454000 | -0.427396000 | 2.353976000  |
| O | -1.342642000 | -0.453967000 | -1.756320000 |
| H | -1.787623000 | 0.050080000  | -2.466345000 |

## E

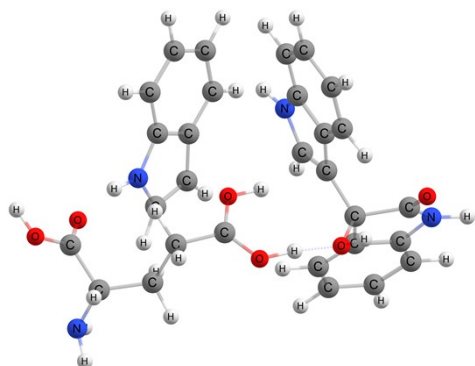

|                                              |                             |
|----------------------------------------------|-----------------------------|
| Zero-point correction=                       | 0.543175 (Hartree/Particle) |
| Thermal correction to Energy=                | 0.578908                    |
| Thermal correction to Enthalpy=              | 0.579852                    |
| Thermal correction to Gibbs Free Energy=     | 0.468961                    |
| Sum of electronic and zero-point Energies=   | -1792.309731                |
| Sum of electronic and thermal Energies=      | -1792.273997                |
| Sum of electronic and thermal Enthalpies=    | -1792.273053                |
| Sum of electronic and thermal Free Energies= | -1792.383945                |

|   |              |              |              |
|---|--------------|--------------|--------------|
| N | 5.308358000  | -3.449689000 | 0.187700000  |
| H | 5.002930000  | -3.219878000 | 1.128228000  |
| C | 4.658379000  | -2.644606000 | -0.837831000 |
| H | 4.923778000  | -3.074254000 | -1.808790000 |
| C | 3.124306000  | -2.544717000 | -0.698388000 |
| C | 5.305921000  | -1.257379000 | -0.749991000 |
| H | 2.717166000  | -3.558193000 | -0.630612000 |
| H | 2.897604000  | -2.021569000 | 0.236851000  |
| C | 2.460303000  | -1.799589000 | -1.891886000 |
| O | 4.943528000  | -0.383028000 | 0.019097000  |
| H | 2.953689000  | -0.840563000 | -2.066582000 |
| H | 2.514636000  | -2.411256000 | -2.796406000 |
| C | 1.027850000  | -1.522986000 | -1.589624000 |
| O | 0.761392000  | -0.372763000 | -1.065871000 |
| H | 5.212696000  | -4.446150000 | 0.027130000  |
| O | 6.335726000  | -1.116950000 | -1.589848000 |
| H | 6.762642000  | -0.256670000 | -1.426009000 |
| O | 0.155584000  | -2.422093000 | -1.806670000 |
| H | -0.871705000 | -2.234088000 | -1.546808000 |

|   |              |              |              |
|---|--------------|--------------|--------------|
| C | -2.839483000 | -1.563226000 | 1.093784000  |
| C | -4.175239000 | -1.524885000 | 1.527424000  |
| C | -4.533270000 | -1.819551000 | 2.836071000  |
| C | -3.507821000 | -2.179723000 | 3.721478000  |
| C | -2.174338000 | -2.234459000 | 3.305000000  |
| C | -1.831735000 | -1.915634000 | 1.983140000  |
| C | -2.798086000 | -1.121935000 | -0.351004000 |
| H | -5.567141000 | -1.784218000 | 3.163988000  |
| H | -3.759289000 | -2.424381000 | 4.748561000  |
| H | -1.400702000 | -2.523959000 | 4.008180000  |
| H | -0.792757000 | -1.953910000 | 1.668572000  |
| N | -5.018300000 | -1.174798000 | 0.449482000  |
| H | -6.027528000 | -1.251424000 | 0.458910000  |
| C | -4.317070000 | -1.103906000 | -0.718747000 |
| O | -4.736561000 | -1.108989000 | -1.863039000 |
| C | -2.076884000 | 0.990840000  | -1.813131000 |
| C | -1.470001000 | 2.230203000  | -1.473960000 |
| C | -1.212439000 | 3.231418000  | -2.418208000 |
| C | -1.586800000 | 2.978179000  | -3.731592000 |
| C | -2.203641000 | 1.760711000  | -4.092767000 |
| C | -2.451908000 | 0.766887000  | -3.153924000 |
| C | -2.131691000 | 0.211853000  | -0.579379000 |
| H | -0.745294000 | 4.167846000  | -2.131505000 |
| H | -1.411490000 | 3.732572000  | -4.491889000 |
| H | -2.502707000 | 1.604243000  | -5.124339000 |
| H | -2.965930000 | -0.140925000 | -3.447434000 |
| H | -0.205952000 | -0.208335000 | -0.839574000 |
| N | -1.213707000 | 2.217213000  | -0.111815000 |
| H | -0.724420000 | 2.942062000  | 0.408454000  |
| C | -1.611721000 | 1.033663000  | 0.422546000  |
| H | -1.500295000 | 0.840551000  | 1.479211000  |
| O | -2.231590000 | -2.145344000 | -1.251208000 |



|   |              |              |              |
|---|--------------|--------------|--------------|
| H | -2.818947000 | -2.197205000 | -2.031399000 |
| C | 1.306157000  | 2.410011000  | 2.622218000  |
| C | 2.280364000  | 2.263771000  | 1.588899000  |
| C | 2.450482000  | 3.223590000  | 0.581933000  |
| C | 1.631628000  | 4.348950000  | 0.617129000  |
| C | 0.659013000  | 4.516582000  | 1.631556000  |
| C | 0.491243000  | 3.559725000  | 2.631131000  |
| C | 1.431496000  | 1.261221000  | 3.476616000  |
| H | 3.207180000  | 3.105966000  | -0.188095000 |
| H | 1.755731000  | 5.122728000  | -0.134517000 |
| H | 0.057997000  | 5.421199000  | 1.647357000  |
| H | -0.240328000 | 3.711068000  | 3.420249000  |
| H | 0.872169000  | 1.053946000  | 4.378069000  |
| N | 2.950022000  | 1.080506000  | 1.817375000  |
| H | 3.705056000  | 0.704872000  | 1.255441000  |
| C | 2.441529000  | 0.487888000  | 2.956507000  |
| H | 2.862691000  | -0.436707000 | 3.325873000  |

## F

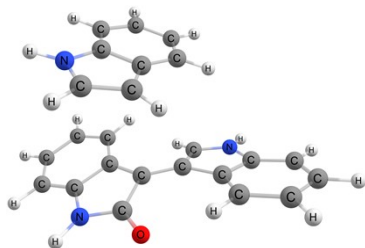

|                                              |                             |
|----------------------------------------------|-----------------------------|
| Zero-point correction=                       | 0.364336 (Hartree/Particle) |
| Thermal correction to Energy=                | 0.386536                    |
| Thermal correction to Enthalpy=              | 0.387480                    |
| Thermal correction to Gibbs Free Energy=     | 0.309434                    |
| Sum of electronic and zero-point Energies=   | -1164.372850                |
| Sum of electronic and thermal Energies=      | -1164.350651                |
| Sum of electronic and thermal Enthalpies=    | -1164.349706                |
| Sum of electronic and thermal Free Energies= | -1164.427753                |

|   |              |              |              |
|---|--------------|--------------|--------------|
| C | -1.262346000 | 1.271903000  | 0.811804000  |
| C | -1.953292000 | 2.396567000  | 0.272259000  |
| C | -3.270929000 | 2.684032000  | 0.602947000  |
| C | -3.924654000 | 1.806774000  | 1.474923000  |
| C | -3.289141000 | 0.656358000  | 1.976873000  |
| C | -1.970076000 | 0.376611000  | 1.641169000  |
| C | 0.081721000  | 1.297916000  | 0.302145000  |
| H | -3.778665000 | 3.553993000  | 0.199876000  |
| H | -4.954437000 | 2.009750000  | 1.752489000  |
| H | -3.840422000 | -0.026381000 | 2.614042000  |
| H | -1.520949000 | -0.550485000 | 1.977056000  |
| N | -1.109874000 | 3.082700000  | -0.590466000 |
| H | -1.348990000 | 3.896645000  | -1.139778000 |
| C | 0.122767000  | 2.463587000  | -0.691057000 |
| O | 1.037075000  | 2.829449000  | -1.403161000 |
| C | 2.576134000  | 0.467230000  | 0.183435000  |
| C | 3.292065000  | -0.358406000 | 1.082305000  |
| C | 4.619322000  | -0.733523000 | 0.911472000  |
| C | 5.264702000  | -0.256332000 | -0.232141000 |
| C | 4.584005000  | 0.556069000  | -1.149685000 |
| C | 3.248065000  | 0.925564000  | -0.959561000 |
| C | 1.209212000  | 0.587477000  | 0.719714000  |
| H | 5.131225000  | -1.369110000 | 1.627202000  |
| H | 6.302011000  | -0.519988000 | -0.409566000 |
| H | 5.106826000  | 0.915966000  | -2.029806000 |
| H | 2.750035000  | 1.571474000  | -1.667854000 |
| N | 2.419358000  | -0.706545000 | 2.125712000  |
| H | 2.679734000  | -1.253058000 | 2.937726000  |
| C | 1.212570000  | -0.186825000 | 1.923464000  |
| H | 0.428991000  | -0.303342000 | 2.655402000  |
| C | -0.682087000 | -1.851161000 | -1.150374000 |
| C | -2.097737000 | -2.001207000 | -1.163703000 |

|   |              |              |              |
|---|--------------|--------------|--------------|
| C | -2.763748000 | -2.919147000 | -0.347317000 |
| C | -1.987268000 | -3.695965000 | 0.511993000  |
| C | -0.583909000 | -3.561836000 | 0.550797000  |
| C | 0.076019000  | -2.650061000 | -0.272419000 |
| C | -0.358706000 | -0.840360000 | -2.117306000 |
| H | -3.843052000 | -3.034381000 | -0.383169000 |
| H | -2.470976000 | -4.428757000 | 1.150168000  |
| H | -0.009802000 | -4.203928000 | 1.212313000  |
| H | 1.160556000  | -2.587885000 | -0.271529000 |
| H | 0.625010000  | -0.500697000 | -2.407951000 |
| N | -2.592908000 | -1.109404000 | -2.102029000 |
| H | -3.560909000 | -1.025427000 | -2.373832000 |
| C | -1.549304000 | -0.425878000 | -2.679535000 |
| H | -1.729130000 | 0.296457000  | -3.463217000 |

### TS3

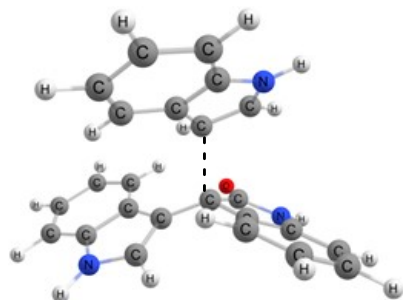

|                                              |                             |
|----------------------------------------------|-----------------------------|
| Zero-point correction=                       | 0.365410 (Hartree/Particle) |
| Thermal correction to Energy=                | 0.386044                    |
| Thermal correction to Enthalpy=              | 0.386988                    |
| Thermal correction to Gibbs Free Energy=     | 0.315781                    |
| Sum of electronic and zero-point Energies=   | -1164.359438                |
| Sum of electronic and thermal Energies=      | -1164.338803                |
| Sum of electronic and thermal Enthalpies=    | -1164.337859                |
| Sum of electronic and thermal Free Energies= | -1164.409066                |

|   |             |              |             |
|---|-------------|--------------|-------------|
| C | 1.350964000 | -1.124828000 | 0.580129000 |
| C | 1.918896000 | -2.337762000 | 0.135669000 |
| C | 3.114758000 | -2.826468000 | 0.646240000 |
| C | 3.764928000 | -2.058714000 | 1.622108000 |

|   |              |              |              |
|---|--------------|--------------|--------------|
| C | 3.235745000  | -0.838430000 | 2.057668000  |
| C | 2.026978000  | -0.362067000 | 1.535079000  |
| C | 0.071017000  | -0.921818000 | -0.142997000 |
| H | 3.531599000  | -3.769971000 | 0.308540000  |
| H | 4.698747000  | -2.419084000 | 2.042070000  |
| H | 3.766123000  | -0.256040000 | 2.803677000  |
| H | 1.636152000  | 0.597073000  | 1.858451000  |
| N | 1.100524000  | -2.894895000 | -0.854751000 |
| H | 1.274513000  | -3.759807000 | -1.349453000 |
| C | -0.004289000 | -2.114808000 | -1.122714000 |
| O | -0.837483000 | -2.328465000 | -1.982919000 |
| C | -2.502643000 | -0.374489000 | 0.087647000  |
| C | -3.276910000 | 0.021949000  | 1.208104000  |
| C | -4.643211000 | 0.294036000  | 1.141044000  |
| C | -5.254061000 | 0.169094000  | -0.104885000 |
| C | -4.514225000 | -0.222171000 | -1.235535000 |
| C | -3.150556000 | -0.500238000 | -1.155659000 |
| C | -1.132925000 | -0.540762000 | 0.565720000  |
| H | -5.207999000 | 0.589894000  | 2.019784000  |
| H | -6.316106000 | 0.369648000  | -0.201363000 |
| H | -5.020033000 | -0.326240000 | -2.190046000 |
| H | -2.614724000 | -0.854299000 | -2.026757000 |
| N | -2.423944000 | 0.075257000  | 2.309005000  |
| H | -2.711640000 | 0.268109000  | 3.258202000  |
| C | -1.164759000 | -0.245458000 | 1.935645000  |
| H | -0.369298000 | -0.298272000 | 2.662608000  |
| C | 0.643556000  | 1.791986000  | -0.820079000 |
| C | 2.015484000  | 2.049289000  | -1.020178000 |
| C | 2.684136000  | 3.131517000  | -0.456513000 |
| C | 1.921789000  | 3.989139000  | 0.340446000  |
| C | 0.550895000  | 3.760743000  | 0.550886000  |
| C | -0.101935000 | 2.664631000  | -0.021793000 |

|   |              |              |              |
|---|--------------|--------------|--------------|
| C | 0.319651000  | 0.550971000  | -1.531378000 |
| H | 3.740253000  | 3.312166000  | -0.629811000 |
| H | 2.395488000  | 4.853230000  | 0.794577000  |
| H | -0.013447000 | 4.458971000  | 1.160747000  |
| H | -1.164690000 | 2.510083000  | 0.130327000  |
| H | -0.646034000 | 0.355108000  | -1.983738000 |
| N | 2.498892000  | 1.047864000  | -1.885158000 |
| H | 3.457493000  | 0.973840000  | -2.204090000 |
| C | 1.517591000  | 0.215762000  | -2.236236000 |
| H | 1.689918000  | -0.600900000 | -2.924561000 |

## G

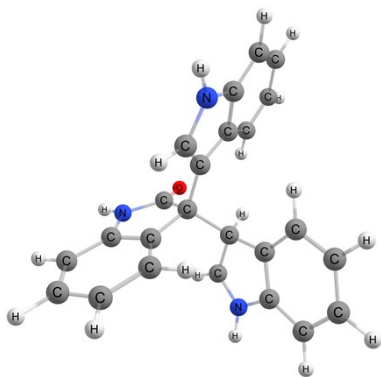

|                                              |                             |
|----------------------------------------------|-----------------------------|
| Zero-point correction=                       | 0.366694 (Hartree/Particle) |
| Thermal correction to Energy=                | 0.387503                    |
| Thermal correction to Enthalpy=              | 0.388447                    |
| Thermal correction to Gibbs Free Energy=     | 0.316716                    |
| Sum of electronic and zero-point Energies=   | -1164.366563                |
| Sum of electronic and thermal Energies=      | -1164.345754                |
| Sum of electronic and thermal Enthalpies=    | -1164.344809                |
| Sum of electronic and thermal Free Energies= | -1164.416540                |

|   |             |              |              |
|---|-------------|--------------|--------------|
| C | 1.480575000 | -1.178818000 | 0.353580000  |
| C | 1.871460000 | -2.440628000 | -0.127094000 |
| C | 2.948097000 | -3.136858000 | 0.410520000  |
| C | 3.654391000 | -2.530803000 | 1.458081000  |
| C | 3.288972000 | -1.271504000 | 1.943595000  |
| C | 2.191971000 | -0.589609000 | 1.394760000  |

|   |              |              |              |
|---|--------------|--------------|--------------|
| C | 0.247129000  | -0.725027000 | -0.414380000 |
| H | 3.235085000  | -4.114179000 | 0.035520000  |
| H | 4.498916000  | -3.052022000 | 1.897658000  |
| H | 3.851035000  | -0.821844000 | 2.755534000  |
| H | 1.901041000  | 0.379459000  | 1.788851000  |
| N | 1.036959000  | -2.813789000 | -1.194519000 |
| H | 1.132650000  | -3.654671000 | -1.749031000 |
| C | 0.135318000  | -1.830055000 | -1.517230000 |
| O | -0.582883000 | -1.793613000 | -2.500319000 |
| C | -2.368494000 | -0.421488000 | -0.003824000 |
| C | -3.175290000 | -0.471874000 | 1.166207000  |
| C | -4.554707000 | -0.242560000 | 1.149295000  |
| C | -5.139167000 | 0.047580000  | -0.078926000 |
| C | -4.367084000 | 0.092892000  | -1.257703000 |
| C | -2.996913000 | -0.145969000 | -1.236839000 |
| C | -1.007558000 | -0.696578000 | 0.421574000  |
| H | -5.147890000 | -0.293796000 | 2.057400000  |
| H | -6.207940000 | 0.228358000  | -0.132265000 |
| H | -4.856864000 | 0.297184000  | -2.204498000 |
| H | -2.440381000 | -0.175827000 | -2.166277000 |
| N | -2.344251000 | -0.777717000 | 2.231620000  |
| H | -2.645097000 | -0.925154000 | 3.183379000  |
| C | -1.056671000 | -0.912183000 | 1.787594000  |
| H | -0.260515000 | -1.158235000 | 2.473507000  |
| C | 0.584878000  | 1.922008000  | -0.376883000 |
| C | 1.792448000  | 2.539743000  | -0.736284000 |
| C | 2.254183000  | 3.734719000  | -0.197691000 |
| C | 1.432954000  | 4.333226000  | 0.761387000  |
| C | 0.213872000  | 3.746535000  | 1.133913000  |
| C | -0.227250000 | 2.541906000  | 0.569777000  |
| C | 0.433450000  | 0.661461000  | -1.193438000 |
| H | 3.192220000  | 4.186589000  | -0.503781000 |

|   |              |              |              |
|---|--------------|--------------|--------------|
| H | 1.739939000  | 5.268935000  | 1.216332000  |
| H | -0.407072000 | 4.243099000  | 1.872559000  |
| H | -1.178987000 | 2.110875000  | 0.856699000  |
| H | -0.435238000 | 0.704473000  | -1.870835000 |
| N | 2.394888000  | 1.729606000  | -1.736180000 |
| H | 3.286781000  | 1.940069000  | -2.176591000 |
| C | 1.666396000  | 0.683438000  | -2.021530000 |
| H | 1.974471000  | -0.038449000 | -2.768818000 |

### LYS -H (Deprotonated)

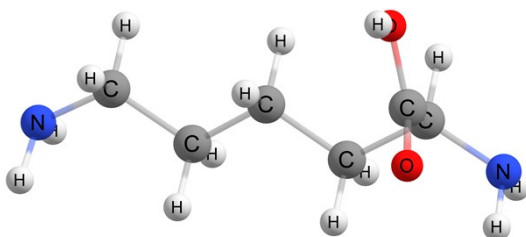

|                                              |                             |
|----------------------------------------------|-----------------------------|
| Zero-point correction=                       | 0.210954 (Hartree/Particle) |
| Thermal correction to Energy=                | 0.223155                    |
| Thermal correction to Enthalpy=              | 0.224100                    |
| Thermal correction to Gibbs Free Energy=     | 0.171361                    |
| Sum of electronic and zero-point Energies=   | -496.864625                 |
| Sum of electronic and thermal Energies=      | -496.852424                 |
| Sum of electronic and thermal Enthalpies=    | -496.851480                 |
| Sum of electronic and thermal Free Energies= | -496.904218                 |

|   |              |              |              |
|---|--------------|--------------|--------------|
| N | -2.769690000 | 1.620407000  | -0.176488000 |
| H | -2.945554000 | 1.651789000  | 0.825397000  |
| C | -1.730555000 | 0.631710000  | -0.473426000 |
| H | -1.676952000 | 0.504990000  | -1.559797000 |
| C | -0.321252000 | 0.990400000  | 0.064115000  |
| C | -2.195509000 | -0.686628000 | 0.131349000  |
| H | -0.075047000 | 1.984552000  | -0.333849000 |
| H | -0.385969000 | 1.093531000  | 1.155359000  |
| C | 0.795254000  | 0.005119000  | -0.309126000 |
| O | -2.598778000 | -0.812085000 | 1.269179000  |
| H | 0.579012000  | -0.982934000 | 0.118756000  |

|   |              |              |              |
|---|--------------|--------------|--------------|
| H | 0.810773000  | -0.132702000 | -1.399547000 |
| C | 2.181053000  | 0.464277000  | 0.166165000  |
| H | 2.411951000  | 1.448506000  | -0.267611000 |
| H | 2.168259000  | 0.602921000  | 1.257138000  |
| C | 3.304548000  | -0.520339000 | -0.200747000 |
| H | 3.081867000  | -1.504487000 | 0.231024000  |
| H | 3.324037000  | -0.661962000 | -1.289013000 |
| N | 4.657475000  | -0.148551000 | 0.221198000  |
| H | 4.711882000  | -0.049386000 | 1.231809000  |
| H | 4.936859000  | 0.740895000  | -0.184939000 |
| H | -2.478723000 | 2.546113000  | -0.478118000 |
| O | -2.087825000 | -1.728878000 | -0.724294000 |
| H | -2.385302000 | -2.524338000 | -0.248631000 |

## H

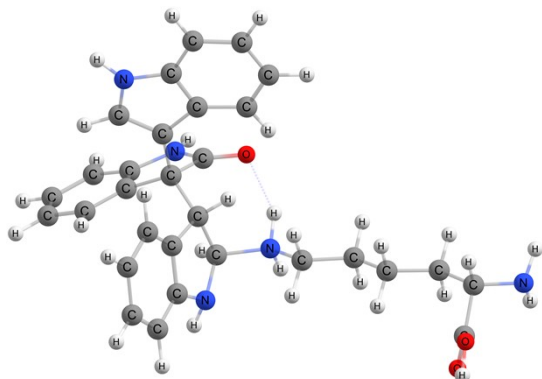

|                                              |                             |
|----------------------------------------------|-----------------------------|
| Zero-point correction=                       | 0.584137 (Hartree/Particle) |
| Thermal correction to Energy=                | 0.617454                    |
| Thermal correction to Enthalpy=              | 0.618399                    |
| Thermal correction to Gibbs Free Energy=     | 0.515062                    |
| Sum of electronic and zero-point Energies=   | -1661.255577                |
| Sum of electronic and thermal Energies=      | -1661.222260                |
| Sum of electronic and thermal Enthalpies=    | -1661.221316                |
| Sum of electronic and thermal Free Energies= | -1661.324653                |

|   |              |              |              |
|---|--------------|--------------|--------------|
| C | -3.416570000 | -1.007086000 | -0.806511000 |
| C | -3.777024000 | -0.995310000 | -2.164156000 |
| C | -4.838227000 | -1.736333000 | -2.666605000 |
| C | -5.552193000 | -2.532735000 | -1.760247000 |



|   |              |              |              |
|---|--------------|--------------|--------------|
| C | -5.203127000 | -2.573373000 | -0.407502000 |
| C | -4.135703000 | -1.802970000 | 0.080577000  |
| C | -2.278941000 | -0.012895000 | -0.592511000 |
| H | -5.105737000 | -1.707630000 | -3.718253000 |
| H | -6.385916000 | -3.127438000 | -2.119768000 |
| H | -5.764523000 | -3.203234000 | 0.274890000  |
| H | -3.879834000 | -1.830450000 | 1.134263000  |
| N | -2.878793000 | -0.167008000 | -2.873845000 |
| H | -2.844133000 | -0.072788000 | -3.881102000 |
| C | -1.882296000 | 0.291184000  | -2.069601000 |
| O | -0.815727000 | 0.782444000  | -2.455406000 |
| C | -2.062874000 | 2.521021000  | 0.252705000  |
| C | -2.951788000 | 3.395727000  | 0.938134000  |
| C | -2.599181000 | 4.696141000  | 1.316630000  |
| C | -1.320938000 | 5.134196000  | 0.993187000  |
| C | -0.423306000 | 4.297345000  | 0.297550000  |
| C | -0.779799000 | 3.007335000  | -0.077683000 |
| C | -2.783089000 | 1.276189000  | 0.047812000  |
| H | -3.299657000 | 5.340697000  | 1.839279000  |
| H | -1.013327000 | 6.137789000  | 1.268905000  |
| H | 0.559975000  | 4.676923000  | 0.037111000  |
| H | -0.091954000 | 2.406341000  | -0.661076000 |
| N | -4.143119000 | 2.718829000  | 1.118040000  |
| H | -4.969405000 | 3.095579000  | 1.556918000  |
| C | -4.042833000 | 1.460268000  | 0.580748000  |
| H | -4.878253000 | 0.778251000  | 0.621667000  |
| C | -1.133120000 | -1.135818000 | 1.521285000  |
| C | -0.513762000 | -2.390157000 | 1.548398000  |
| C | -0.460855000 | -3.163814000 | 2.704212000  |
| C | -1.049947000 | -2.642980000 | 3.862308000  |
| C | -1.646909000 | -1.377133000 | 3.860403000  |
| C | -1.682954000 | -0.609299000 | 2.689579000  |

|   |              |              |              |
|---|--------------|--------------|--------------|
| C | -0.997375000 | -0.537427000 | 0.136097000  |
| H | 0.025830000  | -4.134293000 | 2.713033000  |
| H | -1.027819000 | -3.226420000 | 4.777395000  |
| H | -2.080036000 | -0.983983000 | 4.774342000  |
| H | -2.138655000 | 0.374736000  | 2.690787000  |
| H | -0.331945000 | 0.329837000  | 0.186391000  |
| N | 0.059390000  | -2.709433000 | 0.283369000  |
| H | -0.071534000 | -3.662358000 | -0.036266000 |
| C | -0.280521000 | -1.677341000 | -0.651247000 |
| H | -0.882225000 | -2.052155000 | -1.486136000 |
| N | 8.232774000  | 1.112622000  | -1.204931000 |
| H | 8.441989000  | 0.427306000  | -1.925970000 |
| C | 7.047362000  | 0.738600000  | -0.432291000 |
| H | 6.828944000  | 1.566998000  | 0.249444000  |
| C | 5.800088000  | 0.400049000  | -1.273143000 |
| C | 7.469956000  | -0.464433000 | 0.414519000  |
| H | 5.591166000  | 1.261198000  | -1.920919000 |
| H | 6.049305000  | -0.446643000 | -1.924631000 |
| C | 4.554953000  | 0.060211000  | -0.440373000 |
| O | 7.517020000  | -1.605303000 | 0.000188000  |
| H | 4.780819000  | -0.778984000 | 0.229429000  |
| H | 4.289296000  | 0.914360000  | 0.197192000  |
| C | 3.351117000  | -0.316798000 | -1.319002000 |
| H | 3.094620000  | 0.522740000  | -1.978633000 |
| H | 3.632723000  | -1.160091000 | -1.965449000 |
| C | 2.138818000  | -0.704982000 | -0.473326000 |
| H | 2.344948000  | -1.560349000 | 0.172778000  |
| H | 1.801148000  | 0.127196000  | 0.147466000  |
| N | 0.979075000  | -1.105871000 | -1.353092000 |
| H | 1.318827000  | -1.798686000 | -2.026392000 |
| H | 0.626359000  | -0.291571000 | -1.899242000 |
| H | 8.129667000  | 2.025323000  | -1.636641000 |

|   |             |              |             |
|---|-------------|--------------|-------------|
| O | 7.807358000 | -0.121764000 | 1.673007000 |
| H | 8.141055000 | -0.919465000 | 2.120440000 |

### 3a

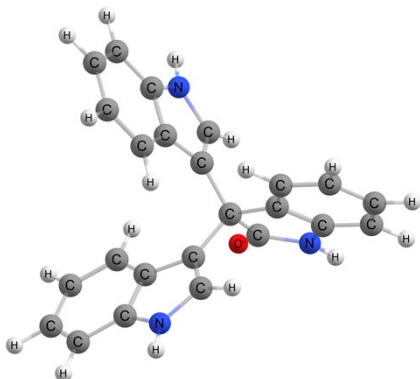

|                                              |                             |
|----------------------------------------------|-----------------------------|
| Zero-point correction=                       | 0.353568 (Hartree/Particle) |
| Thermal correction to Energy=                | 0.374604                    |
| Thermal correction to Enthalpy=              | 0.375548                    |
| Thermal correction to Gibbs Free Energy=     | 0.303465                    |
| Sum of electronic and zero-point Energies=   | -1164.015607                |
| Sum of electronic and thermal Energies=      | -1163.994572                |
| Sum of electronic and thermal Enthalpies=    | -1163.993628                |
| Sum of electronic and thermal Free Energies= | -1164.065711                |

|   |              |              |              |
|---|--------------|--------------|--------------|
| C | -2.099061000 | -0.353980000 | -0.240443000 |
| C | -3.009442000 | -1.130481000 | 0.493337000  |
| C | -4.331555000 | -1.302248000 | 0.095258000  |
| C | -4.745357000 | -0.659772000 | -1.079617000 |
| C | -3.858351000 | 0.130389000  | -1.816084000 |
| C | -2.527719000 | 0.287614000  | -1.395647000 |
| C | -0.733008000 | -0.377723000 | 0.453959000  |
| H | -5.022740000 | -1.906352000 | 0.675668000  |
| H | -5.772273000 | -0.774102000 | -1.414119000 |
| H | -4.200007000 | 0.631077000  | -2.716731000 |
| H | -1.846849000 | 0.912584000  | -1.963985000 |
| N | -2.370808000 | -1.636539000 | 1.631937000  |
| H | -2.807229000 | -2.194798000 | 2.352133000  |
| C | -1.071457000 | -1.189543000 | 1.753985000  |
| O | -0.343883000 | -1.409249000 | 2.705798000  |

|   |              |              |              |
|---|--------------|--------------|--------------|
| C | 1.676257000  | -1.423905000 | 0.000731000  |
| C | 2.216853000  | -2.252560000 | -1.020456000 |
| C | 3.552180000  | -2.674283000 | -1.022926000 |
| C | 4.357660000  | -2.253808000 | 0.029860000  |
| C | 3.842023000  | -1.437301000 | 1.059940000  |
| C | 2.515794000  | -1.021817000 | 1.057414000  |
| C | 0.287080000  | -1.192284000 | -0.336248000 |
| H | 3.944092000  | -3.306870000 | -1.814758000 |
| H | 5.398658000  | -2.562086000 | 0.061730000  |
| H | 4.495589000  | -1.133341000 | 1.872327000  |
| H | 2.123348000  | -0.413187000 | 1.863240000  |
| N | 1.200408000  | -2.516009000 | -1.918969000 |
| H | 1.285855000  | -3.073185000 | -2.753718000 |
| C | 0.046864000  | -1.881068000 | -1.503404000 |
| H | -0.863098000 | -1.963185000 | -2.078713000 |
| C | 0.369300000  | 1.981990000  | -0.083640000 |
| C | 0.598296000  | 3.161748000  | 0.679262000  |
| C | 1.178724000  | 4.313076000  | 0.134216000  |
| C | 1.541256000  | 4.277560000  | -1.208184000 |
| C | 1.334140000  | 3.117765000  | -1.985353000 |
| C | 0.757405000  | 1.976858000  | -1.438408000 |
| C | -0.234084000 | 1.013844000  | 0.807343000  |
| H | 1.342972000  | 5.201772000  | 0.737487000  |
| H | 1.995547000  | 5.152954000  | -1.662790000 |
| H | 1.639759000  | 3.115586000  | -3.027571000 |
| H | 0.627121000  | 1.086194000  | -2.043887000 |
| N | 0.154777000  | 2.913309000  | 1.962618000  |
| H | 0.233271000  | 3.546363000  | 2.742176000  |
| C | -0.333638000 | 1.623777000  | 2.035686000  |
| H | -0.694550000 | 1.226164000  | 2.972549000  |

## References for the Computational part:

1. H. J. Swift, L. Brady, Z. S. Derewenda, E. J. Dodson, G. G. Dodson, J. P. Turkenburg, A. J. Wilkinson, *Acta Crystallogr Sect B: Struct Sci*, 1991, **47**, 535-544.
2. Gaussian 16, Revision C.01, M. J. Frisch, G. W. Trucks, H. B. Schlegel, G. E. Scuseria, M. A. Robb, J. R. Cheeseman, G. Scalmani, V. Barone, G. A. Petersson, H. Nakatsuji, X. Li, M. Caricato, A. V. Marenich, J. Bloino, B. G. Janesko, R. Gomperts, B. Mennucci, H. P. Hratchian, J. V. Ortiz, A. F. Izmaylov, J. L. Sonnenberg, D. Williams-Young, F. Ding, F. Lipparini, F. Egidi, J. Goings, B. Peng, A. Petrone, T. Henderson, D. Ranasinghe, V. G. Zakrzewski, J. Gao, N. Rega, G. Zheng, W. Liang, M. Hada, M. Ehara, K. Toyota, R. Fukuda, J. Hasegawa, M. Ishida, T. Nakajima, Y. Honda, O. Kitao, H. Nakai, T. Vreven, K. Throssell, J. A. Montgomery, Jr., J. E. Peralta, F. Ogliaro, M. J. Bearpark, J. J. Heyd, E. N. Brothers, K. N. Kudin, V. N. Staroverov, T. A. Keith, R. Kobayashi, J. Normand, K. Raghavachari, A. P. Rendell, J. C. Burant, S. S. Iyengar, J. Tomasi, M. Cossi, J. M. Millam, M. Klene, C. Adamo, R. Cammi, J. W. Ochterski, R. L. Martin, K. Morokuma, O. Farkas, J. B. Foresman, and D. J. Fox, Gaussian, Inc., Wallingford CT, **2016**.
3. A. Soni, P. Khurana, T. Singh and B. Jayaram, *Bioinformatics*. 2017, **33**, 1488-1496.
4. O. Trott and A.J. Olson, *Journal of computational chemistry*. 2010, **31**, 455-461.
5. Schrödinger, L. & DeLano, W., **2020**. PyMOL, Available at: <http://www.pymol.org/pymol>. 6. M. H. M. Olsson, C. R. Søndergaard, M. Rostkowski, J. H. Jensen, *J. Chem. Theory Comput.* 2011, **7**, 525.
6. D.A. Case, K. Belfon, I.Y. Ben-Shalom, S.R. Brozell, D.S. Cerutti, T.E. Cheatham, III, V.W.D. Cruzeiro, T.A. Darden, R.E. Duke, G. Giambasu, M.K. Gilson, H. Gohlke, A.W. Goetz, R. Harris, S. Izadi, S.A. Izmailov, K. Kasavajhala, A. Kovalenko, R. Krasny, T. Kurtzman, T.S. Lee, S. LeGrand, P. Li, C. Lin, J. Liu, T. Luchko, R. Luo, V. Man, K.M. Merz, Y. Miao, O. Mikhailovskii, G. Monard, H. Nguyen, A. Onufriev, F. Pan, S. Pantano, R. Qi, D.R. Roe, A. Roitberg, C. Sagui, S. Schott-Verdugo, J. Shen, C.L. Simmerling, N.R. Skrynnikov, J. Smith, J. Swails, R.C. Walker, J. Wang, L. Wilson, R.M. Wolf, X. Wu, Y. Xiong, Y. Xue, D.M. York and P.A. Kollman (2020), AMBER 2020, University of California, San Francisco.
7. J. Wang, R. M. Wolf, J. W. Caldwell, P. A. Kollman, D. A. Case, *J. Comput. Chem.* 2020, **25**, 1157.
8. X. He, V. H. Man, W. Yang, T. S. Lee and J. Wang, *The Journal of Chemical Physics*. 2020, **153**, 11.
9. W. L. Jorgensen, J. Chandrasekhar, J. D. Madura, R. W. Impey, M. L. Klein, *The Journal of chemical physics*. 1983, **79**, 926-935.
10. J.A. Maier, C. Martinez, K. Kasavajhala, L. Wickstrom, K.E. Hauser and C. Simmerling, *J. Chem. Theory Comput.* 2015, **11**, 3696-3713.
11. J. A. Izaguirre, D. P. Catarello, J. M. Wozniak, R. D. Skeel, *J. Chem. Phys.* 2001, **114**, 2090.
12. H. J. C. Berendsen, J. P. M. Postma, W. F. V. Gunsteren, A. DiNola, J. R. Haak, *J. Chem. Phys.* 1984, **81**, 3684.
13. J.-P. Ryckaert, G. Ciccotti, H. J. C. Berendsen, *Journal of Computational Physics*. 1977, **23**, 327.
14. T. Darden, D. York, L. Pedersen, *J. Chem. Phys.* 1993, **98**, 10089.
15. Daniel R. Roe and Thomas E. Cheatham, *J. Chem. Theory Comput.* 2013, **9**, 3084-3095.
16. Humphrey, W., Dalke, A. and Schulten, K., *J. Molec. Graphics*. 1996, **14.1**, 33-38.
17. Turner, P. J., & Xmgrace, V. (2005). Center for coastal and land-margin research. Oregon Graduate Institute of Science and Technology.

18. A. D. Becke, *Phys. Rev. A: At., Mol., Opt. Phys.*, 1988, **38**, 3098; (b) C. Lee, W. Yang and R. G. Parr, *Phys. Rev. B: Condens. Matter Mater. Phys.*, 1988, **37**, 785; (c) B. Michlich, A. Savin, H. Stoll and H. Preuss, *Chem. Phys. Lett.*, 1989, **157**, 200.

19. W. J. Hehre, L. Radom, P. V. R. Schleyer and J. A. Pople, *Ab Initio Molecular Orbital Theory*, WileyInterscience, New York, 1986.
